# Supplementary material for: Rh(iii)-catalysed C–H/C–H cross-coupling of S-aryl sulfoximines with thiophenes: facile access to [1]benzothieno[3,2-b][1]benzothiophene (BTBT) and benzothiazines
Source: Royal Society of Chemistry journal article supplement (doi:10.1039/d2cc02232j), 2022-01-01

## *Supporting Information*

**Rh(III)-catalysed C–H/C–H cross-coupling of *S*-Aryl sulfoximines with thiophenes: facile access to [1]benzothieno[3,2-*b*][1]benzothiophene (BTBT) and benzothiazines**

*Chengyong Yang, Zheng Liu, Rui Cheng, Jiping Du, Chunhao Ran, Di Wu\* and Jingbo Lan\**

Key Laboratory of Green Chemistry and Technology of Ministry of Education, College of Chemistry, Sichuan University, 29 Wangjiang Road, Chengdu 610064, P.R. China

## Table of contents

|                                                                           |     |
|---------------------------------------------------------------------------|-----|
| I. General remarks.....                                                   | S1  |
| II. Optimization of reaction conditions.....                              | S2  |
| III. General procedure for heteroarylation of sulfoximines.....           | S6  |
| IV. Procedure for the synthesis of <b>3a</b> on 1.0 mmol scale.....       | S6  |
| V. Mechanistic studies.....                                               | S17 |
| VI. Synthesis of BTBT derivatives.....                                    | S22 |
| VII. Synthesis of thermally activated delayed fluorescence molecules..... | S24 |
| VIII. Single-crystal X-ray structure of <b>3v</b> .....                   | S27 |
| IX. References.....                                                       | S29 |
| X. Copies of <sup>1</sup> H and <sup>13</sup> C NMR spectra.....          | S30 |

## I. General remarks

NMR spectra were obtained on an Agilent 400-MR DD2 spectrometer. The  $^1\text{H}$  NMR (400 MHz) chemical shifts were measured relative to  $\text{CDCl}_3$  as the internal reference ( $\text{CDCl}_3$ :  $\delta = 7.26$ ). The  $^{13}\text{C}$  NMR (100 MHz) chemical shifts were given using  $\text{CDCl}_3$  or  $\text{DMSO-d}_6$  as the internal standard ( $\text{CDCl}_3$ :  $\delta = 77.16$ ). High-resolution mass spectra (HRMS) were obtained with a Shimadzu LCMS-IT-TOF (ESI). X-Ray single-crystal diffraction data were collected on an Agilent Technologies Gemini single-crystal diffractometer. Absorption spectra were obtained on a HITACHI U-2910 spectrometer. Fluorescence spectra and absolute quantum yields were collected on a Horiba Jobin Yvon-Edison Fluoromax-4 fluorescence spectrometer with a calibrated integrating sphere system. The excited state lifetimes were obtained using an HORIBA TEMPRO-01 instrument. Unless otherwise noted, all reagents were obtained from commercial suppliers and used without further purification.

### (1) List of sulfoximine derivatives 1

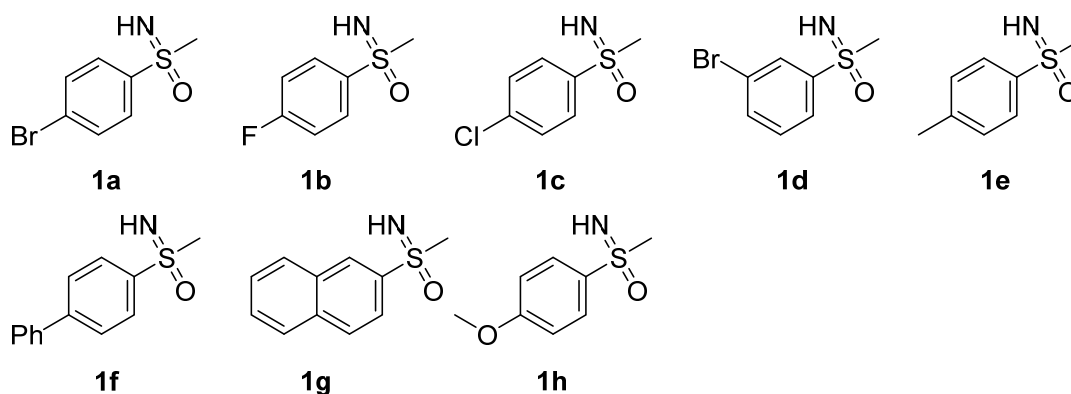

### (2) List of thiophene derivatives 2

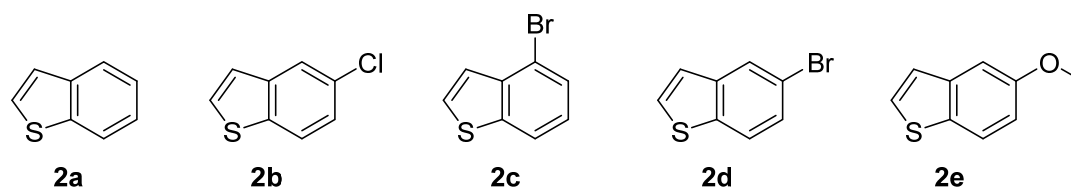

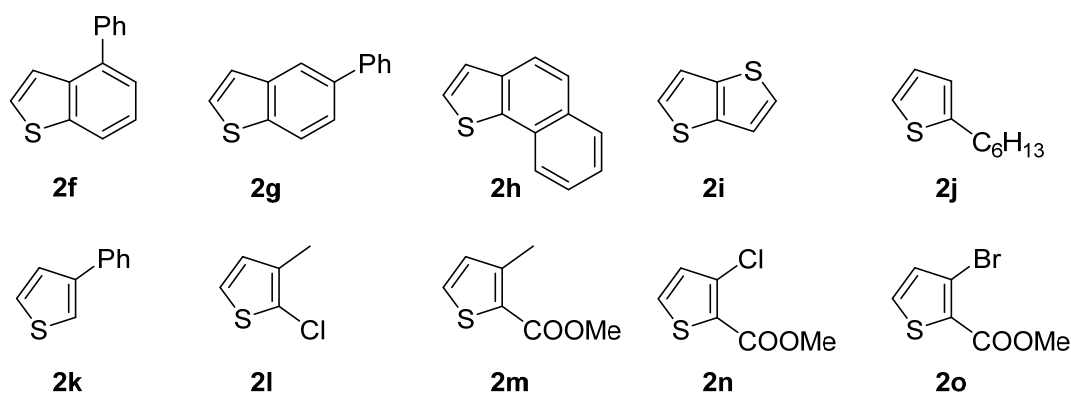

**Synthesis of sulfoximine derivatives 1:** **1a-h**<sup>1</sup> were prepared according to literature procedures.

**Synthesis of thiophene derivatives 2:** **2e**<sup>2</sup>, **2f**<sup>3</sup>, **2g**<sup>4</sup> were prepared according to literature procedures.

**2a-2d, 2h-2o** were purchased from Energy Chemistry.

## II. Optimization of reaction conditions

A flame-dried Schlenk tube with a magnetic stir bar was charged with *S*-(4-bromophenyl)-*S*-methyl sulfoximine (**1a**, 0.3 mmol), benzo[*b*]thiophene (**2a**, 0.1 mmol), catalyst (5.0 mol%), oxidant (3.0 equiv), additive and solvent (1.0 mL). The resulting mixture was stirred at indicated temperature in oil bath for 4.5 h. The solution was filtered through a celite pad and washed with 10-20 mL of dichloromethane. The filtrate was concentrated and the residue was purified by column chromatography on silica gel to provide the desired product **3a**.

**Table S1.** Screening of catalyst<sup>a</sup>

| entry | catalyst                                                 | yield (%) <sup>b</sup> |
|-------|----------------------------------------------------------|------------------------|
| 1     | [Cp*RhCl <sub>2</sub> ] <sub>2</sub> /AgSbF <sub>6</sub> | 21                     |

|                 |                                                                          |           |
|-----------------|--------------------------------------------------------------------------|-----------|
| 2               | [Cp*IrCl <sub>2</sub> ] <sub>2</sub> /AgSbF <sub>6</sub>                 | trace     |
| 3               | Cp*Co(CO)I <sub>2</sub> (10%)                                            | n.d.      |
| 4               | [Rh(cod)Cl] <sub>2</sub> /AgSbF <sub>6</sub>                             | trace     |
| 5               | [Ru( <i>p</i> -cymene)Cl <sub>2</sub> ] <sub>2</sub> /AgSbF <sub>6</sub> | n.d.      |
| 6               | RhCl <sub>3</sub>                                                        | n.d.      |
| 7               | [Cp*RhCl <sub>2</sub> ] <sub>2</sub>                                     | 14        |
| 8               | [Cp*RhCl <sub>2</sub> ] <sub>2</sub> /AgOTFA (20%)                       | 31        |
| <b>9</b>        | <b>[Cp*RhCl<sub>2</sub>]<sub>2</sub>/AgOTFA (30%)</b>                    | <b>38</b> |
| 10              | [Cp*RhCl <sub>2</sub> ] <sub>2</sub> /AgOTFA (50%)                       | 34        |
| 11              | AgOTFA (30%)                                                             | n.d.      |
| 12 <sup>c</sup> | AgOTFA (30%)/Ag <sub>2</sub> CO <sub>3</sub>                             | n.d.      |

<sup>a</sup>Reaction conditions: *S*-(4-bromophenyl)-*S*-methyl sulfoximine (**1a**, 0.3 mmol), benzo[*b*]thiophene (**2a**, 0.1 mmol), catalyst, Ag<sub>2</sub>O (3.0 equiv), K<sub>2</sub>HPO<sub>4</sub> (4.0 equiv), HFIP (1.0 mL) at 120 °C in oil bath for 4.5 h. <sup>b</sup>Isolated yield. n.d. = not detected. HFIP = 1,1,1,3,3,3-hexafluoro-2-propanol. <sup>c</sup> Ag<sub>2</sub>CO<sub>3</sub> (3.0 equiv) was used instead of Ag<sub>2</sub>O (3.0 equiv) as the oxidant.

**Table S2.** Screening of oxidant<sup>a</sup>

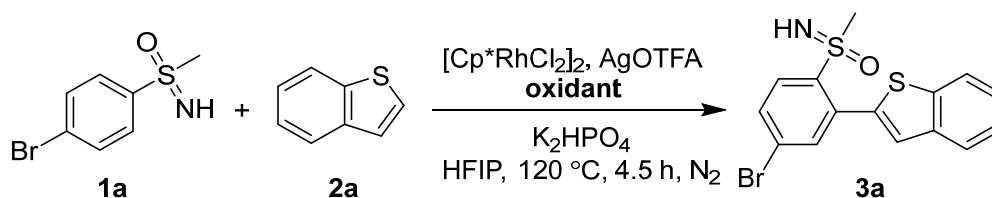

| entry    | oxidant (equiv)                             | yield (%) <sup>b</sup> |
|----------|---------------------------------------------|------------------------|
| 1        | Ag <sub>2</sub> CO <sub>3</sub> (3.0)       | 24                     |
| <b>2</b> | <b>Ag<sub>2</sub>O (3.0)</b>                | <b>38</b>              |
| 3        | Cu(OAc) <sub>2</sub> (3.0)                  | n.d.                   |
| 4        | Cu(OAc) <sub>2</sub> (3.0) + O <sub>2</sub> | trace                  |
| 5        | Ag <sub>2</sub> O (2.0)                     | 29                     |
| 6        | AgOTFA (6.0)                                | trace                  |
| 7        | AgOAc (6.0)                                 | trace                  |
| 8        | PhI(OAc) <sub>2</sub> (3.0)                 | n.d.                   |

|    |                                                      |       |
|----|------------------------------------------------------|-------|
| 9  | Na <sub>2</sub> S <sub>2</sub> O <sub>8</sub> (3.0)  | n.d.  |
| 10 | MnO <sub>2</sub> (3.0)                               | n.d.  |
| 11 | AgNO <sub>3</sub> (6.0)                              | n.d.  |
| 12 | AgOTf (6.0)                                          | n.d.  |
| 13 | Cu(OTf) <sub>2</sub> (3.0)                           | n.d.  |
| 14 | Cu(OTFA) <sub>2</sub> (3.0)                          | n.d.  |
| 15 | BQ                                                   | n.d.  |
| 16 | Cu(OAc) <sub>2</sub> (2.0) + Ag <sub>2</sub> O (1.0) | trace |
| 17 | Cu(OAc) <sub>2</sub> (1.5) + Ag <sub>2</sub> O (1.5) | trace |

<sup>a</sup>Reaction conditions: *S*-(4-bromophenyl)-*S*-methyl sulfoximine (**1a**, 0.3 mmol), benzo[*b*]thiophene (**2a**, 0.1 mmol), [Cp\**RhCl*<sub>2</sub>]<sub>2</sub> (3.1 mg, 5 μmol), AgOTFA (6.6 mg, 30 μmol), oxidant, K<sub>2</sub>HPO<sub>4</sub> (4.0 equiv), HFIP (1.0 mL) at 120 °C in oil bath for 4.5 h. <sup>b</sup>Isolated yield. n.d. = not detected. HFIP = 1,1,1,3,3,3-hexafluoro-2-propanol. BQ = benzoquinone.

**Table S3.** Screening of solvent<sup>a</sup>

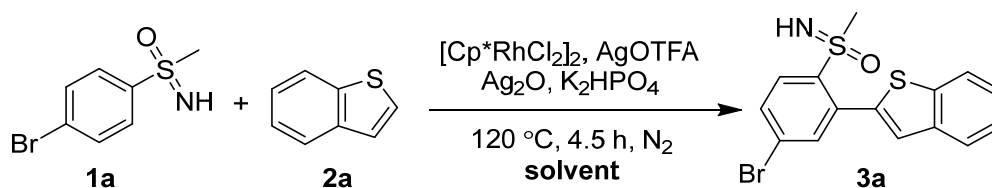

| entry          | solvent            | yield (%) <sup>b</sup> |
|----------------|--------------------|------------------------|
| <b>1</b>       | <b>HFIP</b>        | <b>38</b>              |
| 2 <sup>c</sup> | HFIP               | trace                  |
| 3 <sup>d</sup> | HFIP               | 29                     |
| 4              | TFE                | 17                     |
| 5              | DCE                | trace                  |
| 6              | toluene            | n.d.                   |
| 7              | THF                | n.d.                   |
| 8              | dioxane            | n.d.                   |
| 9              | DMSO               | n.d.                   |
| 10             | MeOH               | n.d.                   |
| 11             | CH <sub>3</sub> CN | n.d.                   |

|    |                |      |
|----|----------------|------|
| 12 | <i>i</i> -PrOH | n.d. |
|----|----------------|------|

<sup>a</sup>Reaction conditions: *S*-(4-bromophenyl)-*S*-methyl sulfoximine (**1a**, 0.3 mmol), benzo[*b*]thiophene (**2a**, 0.1 mmol), [Cp\*RhCl<sub>2</sub>]<sub>2</sub> (3.1 mg, 5.0 μmol), AgOTFA (6.6 mg, 30.0 μmol), Ag<sub>2</sub>O (3.0 equiv), K<sub>2</sub>HPO<sub>4</sub> (4.0 equiv), solvent (1.0 mL) at 120 °C in oil bath for 4.5 h.

<sup>b</sup>Isolated yield. n.d. = not detected. <sup>c</sup>HFIP (2.0 mL). <sup>d</sup>HFIP (0.5 mL). HFIP = 1,1,1,3,3,3-hexafluoro-2-propanol, TFE = 2,2,2-trifluoroethanol, DCE = 1,2-dichloroethane, THF = tetrahydrofuran, DMSO = dimethyl sulfoxide, *i*-PrOH = isopropyl alcohol.

**Table S4.** Screening of additive<sup>a</sup>

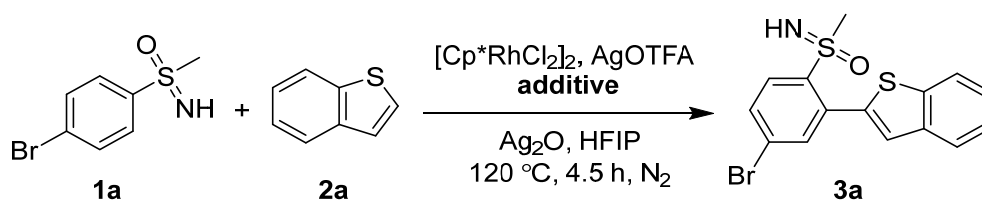

| entry | additive (equiv)                           | yield (%) <sup>b</sup> |
|-------|--------------------------------------------|------------------------|
| 1     | K <sub>2</sub> HPO <sub>4</sub> (4.0)      | 38                     |
| 2     | <b>Na<sub>2</sub>HPO<sub>4</sub> (4.0)</b> | <b>41</b>              |
| 3     | Na <sub>2</sub> HPO <sub>4</sub> (2.0)     | 26                     |
| 4     | Na <sub>2</sub> HPO <sub>4</sub> (1.0)     | 19                     |
| 5     | NaOAc (1.0)                                | trace                  |
| 6     | Zn(OAc) <sub>2</sub> (1.0)                 | trace                  |
| 7     | K <sub>3</sub> PO <sub>4</sub> (1.0)       | 16                     |
| 8     | KH <sub>2</sub> PO <sub>4</sub> (2.0)      | trace                  |
| 9     | NaHCO <sub>3</sub> (2.0)                   | 14                     |
| 10    | Na <sub>2</sub> CO <sub>3</sub> (1.0)      | trace                  |
| 11    | HOAc (1.0)                                 | trace                  |
| 12    | PivOH (1.0)                                | trace                  |
| 13    | -                                          | 24                     |

<sup>a</sup>Reaction conditions: *S*-(4-bromophenyl)-*S*-methyl sulfoximine (**1a**, 0.3 mmol), benzo[*b*]thiophene (**2a**, 0.1 mmol), [Cp\*RhCl<sub>2</sub>]<sub>2</sub> (3.1 mg, 5 μmol), AgOTFA (6.6 mg, 30.0 μmol), Ag<sub>2</sub>O (3.0 equiv), additive, HFIP (1.0 mL) at 120 °C in oil bath for 4.5 h. <sup>b</sup>Isolated yield. HFIP = 1,1,1,3,3,3-hexafluoro-2-propanol.

**Table S5.** Screening of temperature<sup>a</sup>

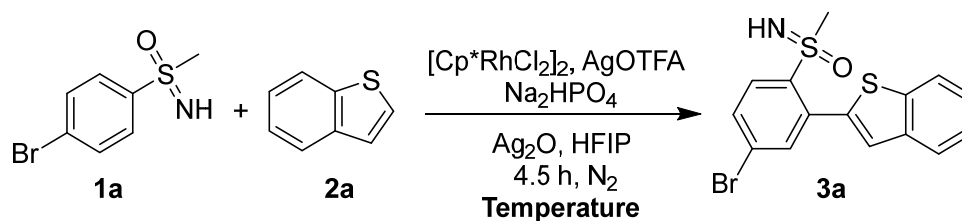

| entry          | temperature   | yield (%) <sup>b</sup> |
|----------------|---------------|------------------------|
| 1              | 120 °C        | 41                     |
| 2              | 100 °C        | 28                     |
| 3              | 130 °C        | 43                     |
| <b>4</b>       | <b>150 °C</b> | <b>69</b>              |
| 5 <sup>c</sup> | 150 °C        | 61                     |
| 6 <sup>d</sup> | 150 °C        | 58                     |

<sup>a</sup>Reaction conditions: *S*-(4-bromophenyl)-*S*-methyl sulfoximine (**1a**, 0.3 mmol), benzo[*b*]thiophene (**2a**, 0.1 mmol),  $[\text{Cp}^*\text{RhCl}_2]_2$  (3.1 mg, 5.0  $\mu\text{mol}$ ), AgOTFA (6.6 mg, 30.0  $\mu\text{mol}$ ),  $\text{Ag}_2\text{O}$  (3.0 equiv),  $\text{Na}_2\text{HPO}_4$  (4.0 equiv), HFIP (1.0 mL) at indicated temperature in oil bath for 4.5 h. <sup>b</sup>Isolated yield. <sup>c</sup>3 h. <sup>d</sup>6 h. HFIP = 1,1,1,3,3,3-hexafluoro-2-propanol.

### III. General procedure for heteroarylation of sulfoximines

A flame-dried Schlenk with a magnetic stir bar was charged with  $[\text{Cp}^*\text{RhCl}_2]_2$  (3.1 mg, 5.0  $\mu\text{mol}$ ),  $\text{Ag}_2\text{O}$  (69.5 mg, 0.3 mmol), AgOTFA (6.6 mg, 30.0  $\mu\text{mol}$ ),  $\text{Na}_2\text{HPO}_4$  (56.8 mg, 0.4 mmol), sulfoximines **1** (0.3 mmol), and thiophenes **2** (0.1 mmol) in HFIP (1.0 mL) under an  $\text{N}_2$  atmosphere. The resulting mixture was stirred at 150 °C in oil bath for 4.5 h and then diluted with 5 mL of dichloromethane. The solution was filtered through a celite pad and washed with 10-20 mL of dichloromethane. The filtrate was concentrated and the residue was purified by column chromatography on silica gel to provide the desired product **3**.

### IV. Procedure for the synthesis of **3a** on 1.0 mmol scale

A flame-dried Schlenk with a magnetic stir bar was charged with  $[\text{Cp}^*\text{RhCl}_2]_2$  (31 mg, 50.0  $\mu\text{mol}$ ),  $\text{Ag}_2\text{O}$  (695 mg, 3.0 mmol), AgOTFA (66 mg, 0.3 mmol),  $\text{Na}_2\text{HPO}_4$  (568 mg, 4.0 mmol), *S*-(4-bromophenyl)-*S*-methyl sulfoximine **1a** (699 mg, 3.0 mmol), and



benzo[*b*]thiophene **2a** (134 mg, 1.0 mmol) in HFIP (10.0 mL) under an N<sub>2</sub> atmosphere. The resulting mixture was stirred at 150 °C in oil bath for 4.5 h and then diluted with 50 mL of dichloromethane. The solution was filtered through a celite pad and washed with 100-200 mL of dichloromethane. The filtrate was concentrated, and the residue was purified by column chromatography on silica gel to provide the desired product **3a** (182 mg, 50% yield).

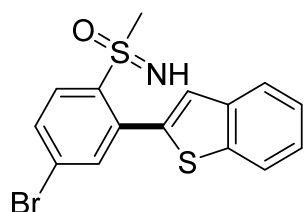

### 2-(5-Bromo-2-(S-methylsulfonimidoyl)phenyl)benzo[*b*]thiophene (**3a**)

Following the general procedure. Purification *via* column chromatography on silica gel (petroleum ether/EtOAc = 2/1, v/v) afforded **3a** as a yellow solid (25.2 mg, 69% yield). <sup>1</sup>H NMR (400 MHz, CDCl<sub>3</sub>): δ = 8.13 (d, *J* = 8.4 Hz, 1H), 7.87-7.83 (m, 2H), 7.74-7.67 (m, 3H), 7.44-7.38 (m, 2H), 2.94 (s, 3H) ppm. <sup>13</sup>C NMR (100 MHz, CDCl<sub>3</sub>): δ = 142.6, 140.6, 139.5, 137.2, 136.8, 135.3, 132.1, 130.4, 127.7, 127.1, 125.4, 125.1, 124.6, 122.1, 44.1 ppm. HRMS (ESI): calcd for C<sub>15</sub>H<sub>13</sub><sup>81</sup>BrNOS<sub>2</sub> [M+H]<sup>+</sup> 367.9596, found 367.9588; calcd for C<sub>15</sub>H<sub>13</sub><sup>79</sup>BrNOS<sub>2</sub> [M+H]<sup>+</sup> 365.9616, found 395.9611.

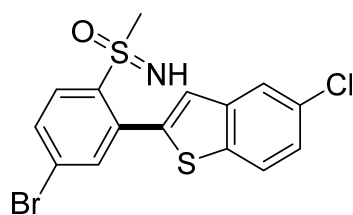

### 2-(5-Bromo-2-(S-methylsulfonimidoyl)phenyl)-5-chlorobenzo[*b*]thiophene (**3b**)

Following the general procedure. Purification *via* column chromatography on silica gel (petroleum ether/EtOAc = 2/1, v/v) afforded **3b** as a gray solid (22.3 mg, 56% yield). <sup>1</sup>H NMR (400 MHz, CDCl<sub>3</sub>): δ = 8.14 (d, *J* = 8.8 Hz, 1H), 7.82-7.72 (m, 4H), 7.58 (s, 1H), 7.36 (d, *J* = 8.8 Hz, 1H), 2.94 (s, 3H) ppm. <sup>13</sup>C NMR (100 MHz, CDCl<sub>3</sub>): δ = 140.5, 138.6, 136.7, 135.7, 134.4, 132.4, 131.4, 130.6, 130.2, 127.2, 126.8, 125.8, 124.0,

123.2, 45.1 ppm. HRMS (ESI): calcd for  $C_{15}H_{12}^{81}Br^{37}ClNOS_2 [M+H]^+$  403.9177, found 403.9171; calcd for  $C_{15}H_{12}^{81}Br^{35}ClNOS_2 [M+H]^+$  401.9206, found 401.9197; calcd for  $C_{15}H_{12}^{79}Br^{35}ClNOS_2 [M+H]^+$  399.9227, found 399.9227.

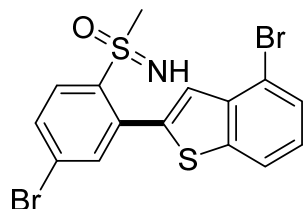

### 2-Bromo-2-(5-bromo-2-(S-methylsulfonimidoyl)phenyl)benzo[b]thiophene (3c)

Following the general procedure. Purification *via* column chromatography on silica gel (petroleum ether/EtOAc = 2/1, v/v) afforded **3c** as a yellow solid (20.7 mg, 47% yield).  $^1H$  NMR (400 MHz,  $CDCl_3$ ):  $\delta$  = 8.14 (d,  $J$  = 8.4 Hz, 1H), 7.79-7.73 (m, 3H), 7.67 (s, 1H), 7.58 (d,  $J$  = 7.6 Hz, 1H), 7.27-7.23 (m, 1H), 3.02 (s, 3H) ppm.  $^{13}C$  NMR (100 MHz,  $CDCl_3$ ):  $\delta$  = 139.2, 138.9, 137.4, 132.64, 132.61, 130.8, 129.6, 128.3, 127.2, 126.2, 125.5, 121.3, 115.9, 115.3, 47.8 ppm. HRMS (ESI): calcd for  $C_{15}H_{12}^{81}Br^{81}BrNOS_2 [M+H]^+$  447.8681, found 447.8680; calcd for  $C_{15}H_{12}^{81}Br^{79}BrNOS_2 [M+H]^+$  445.8701, found 445.8701; calcd for  $C_{15}H_{12}^{79}Br^{79}BrNOS_2 [M+H]^+$  443.8722, found 443.8722.

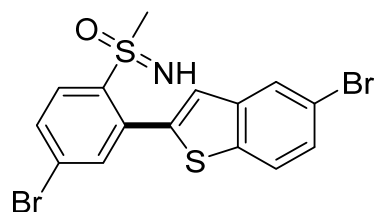

### 2-Bromo-2-(5-bromo-2-(S-methylsulfonimidoyl)phenyl)benzo[b]thiophene (3d)

Following the general procedure. Purification *via* column chromatography on silica gel (petroleum ether/EtOAc = 2/1, v/v) afforded **3d** as a yellow solid (18.9 mg, 43% yield).  $^1H$  NMR (400 MHz,  $CDCl_3$ ):  $\delta$  = 8.14 (d,  $J$  = 9.2 Hz, 1H), 7.98 (s, 1H), 7.74-7.70 (m, 3H), 7.58 (s, 1H), 7.49 (d,  $J$  = 8.4 Hz, 1H), 2.93 (s, 3H) ppm.  $^{13}C$  NMR (100 MHz,  $CDCl_3$ ):  $\delta$  = 140.9, 139.2, 136.7, 134.8, 134.3, 132.5, 130.6, 130.2, 128.5, 127.2, 127.1, 126.6, 123.5, 119.1, 44.3 ppm. HRMS (ESI): calcd for  $C_{15}H_{12}^{81}Br^{81}BrNOS_2 [M+H]^+$

447.8681, found 447.8678; calcd for  $C_{15}H_{12}^{81}Br^{79}BrNOS_2 [M+H]^+$  445.8701, found 445.8698; calcd for  $C_{15}H_{12}^{79}Br^{79}BrNOS_2 [M+H]^+$  443.8722, found 443.8723.

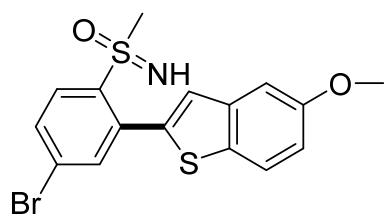

### 2-(5-Bromo-2-(S-methylsulfonimidoyl)phenyl)-5-methoxybenzo[b]thiophene (3e)

Following the general procedure. Purification *via* column chromatography on silica gel (petroleum ether/EtOAc = 2/1, v/v) afforded **3e** as a yellow solid (27.7 mg, 70% yield).  $^1H$  NMR (400 MHz,  $CDCl_3$ ):  $\delta$  = 8.12 (d,  $J$  = 8.8 Hz, 1H), 7.74-7.69 (m, 3H), 7.63 (s, 1H), 7.28 (d,  $J$  = 2.0 Hz, 1H), 7.05 (dd,  $J$  = 8.8 Hz, 2.0 Hz, 1H), 3.88 (s, 3H), 2.93 (s, 3H) ppm.  $^{13}C$  NMR (100 MHz,  $CDCl_3$ ):  $\delta$  = 158.1, 140.6, 138.2, 137.4, 136.7, 135.3, 133.0, 132.0, 130.3, 127.6, 127.1, 122.8, 116.0, 106.2, 55.7, 43.9 ppm. HRMS (ESI): calcd for  $C_{16}H_{15}^{81}BrNO_2S_2 [M+H]^+$  397.9702, found 397.9692; calcd for  $C_{16}H_{15}^{79}BrNO_2S_2 [M+H]^+$  395.9722, found 395.9720.

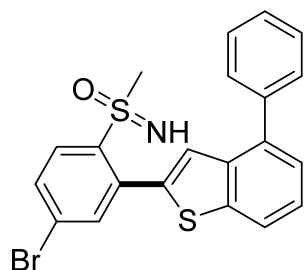

### 2-(5-Bromo-2-(S-methylsulfonimidoyl)phenyl)-4-phenylbenzo[b]thiophene (3f)

Following the general procedure. Purification *via* column chromatography on silica gel (petroleum ether/EtOAc = 2/1, v/v) afforded **3f** as a yellow solid (30.3 mg, 69% yield).  $^1H$  NMR (400 MHz,  $CDCl_3$ ):  $\delta$  = 8.11 (d,  $J$  = 8.0 Hz, 1H), 7.85 (d,  $J$  = 8.0 Hz, 1H), 7.70-7.68 (m, 3H), 7.61-7.59 (m, 2H), 7.49-7.37 (m, 5H), 2.97 (s, 3H) ppm.  $^{13}C$  NMR (100 MHz,  $CDCl_3$ ):  $\delta$  = 142.5, 141.3, 140.5, 138.7, 137.6, 137.1, 136.7, 135.6, 132.2, 130.5, 129.2, 128.7, 127.8, 127.2, 127.1, 125.5, 121.2, 118.1, 44.5 ppm. HRMS (ESI): calcd for  $C_{21}H_{17}^{81}BrNOS_2 [M+H]^+$  443.9909, found 443.9907; calcd for  $C_{21}H_{17}^{79}BrNOS_2 [M+H]^+$  441.9929, found 441.9929.

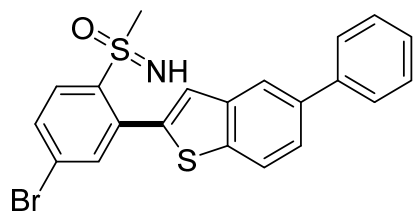

### 2-(5-Bromo-2-(S-methylsulfonimidoyl)phenyl)-5-phenylbenzo[b]thiophene (**3g**)

Following the general procedure. Purification *via* column chromatography on silica gel (petroleum ether/EtOAc = 2/1, v/v) afforded **3g** as a yellow solid (29.9 mg, 68% yield).

$^1\text{H}$  NMR (400 MHz,  $\text{CDCl}_3$ ):  $\delta$  = 8.15 (d,  $J$  = 8.4 Hz, 1H), 8.04 (s, 1H), 7.91 (d,  $J$  = 8.4 Hz, 1H), 7.76-7.72 (m, 3H), 7.67-7.64 (m, 3H), 7.50-7.46 (m, 2H), 7.40-7.36 (m, 1H), 2.97 (s, 3H).  $^{13}\text{C}$  NMR (100 MHz,  $\text{CDCl}_3$ ):  $\delta$  = 168.6, 167.9, 167.5, 159.2, 142.7, 138.7, 136.8, 132.2, 131.6, 130.9, 130.4, 129.3, 129.1, 127.9, 127.5, 125.1, 122.9, 112.4, 43.4 ppm. HRMS (ESI): calcd for  $\text{C}_{21}\text{H}_{17}^{81}\text{BrNOS}_2$   $[\text{M}+\text{H}]^+$  443.9909, found 443.9908; calcd for  $\text{C}_{21}\text{H}_{17}^{79}\text{BrNOS}_2$   $[\text{M}+\text{H}]^+$  441.9929, found 441.9928.

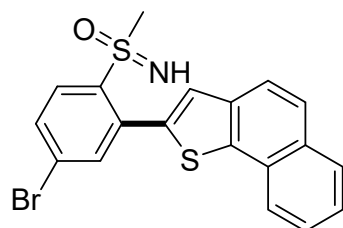

### 2-(5-Bromo-2-(S-methylsulfonimidoyl)phenyl)naphtho[1,2-*b*]thiophene (**3h**)

Following the general procedure. Purification *via* column chromatography on silica gel (petroleum ether/EtOAc = 2/1, v/v) afforded **3h** as a yellow solid (28.0 mg, 67% yield).

$^1\text{H}$  NMR (400 MHz,  $\text{CDCl}_3$ ):  $\delta$  = 8.16 (d,  $J$  = 8.8 Hz, 1H), 8.10 (d,  $J$  = 8.0 Hz, 1H), 7.95 (d,  $J$  = 7.6 Hz, 1H), 7.84-7.77 (m, 4H), 7.73 (dd,  $J$  = 8.8 Hz, 2.0 Hz, 1H), 7.62-7.54 (m, 2H), 2.92 (s, 3H) ppm.  $^{13}\text{C}$  NMR (100 MHz,  $\text{CDCl}_3$ ):  $\delta$  = 142.6, 138.6, 137.4, 136.9, 136.2, 135.2, 132.0, 131.2, 130.3, 129.1, 129.0, 128.6, 127.11, 127.06, 126.4, 126.2, 123.8, 122.5, 43.9 ppm. HRMS (ESI): calcd for  $\text{C}_{19}\text{H}_{15}^{81}\text{BrNOS}_2$   $[\text{M}+\text{H}]^+$  417.9752, found 417.9745; calcd for  $\text{C}_{19}\text{H}_{15}^{79}\text{BrNOS}_2$   $[\text{M}+\text{H}]^+$  415.9773, found 415.9773.

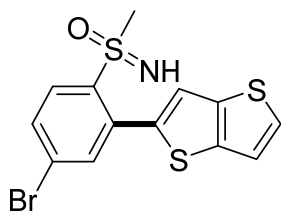

**2-(5-Bromo-2-(S-methylsulfonimidoyl)phenyl)thieno[3,2-*b*]thiophene (3i)**

Following the general procedure. Purification *via* column chromatography on silica gel (petroleum ether/EtOAc = 2/1, v/v) afforded **3i** as a yellow solid (21.9 mg, 59% yield). <sup>1</sup>H NMR (400 MHz, CDCl<sub>3</sub>): δ = 8.12 (d, *J* = 8.8 Hz, 1H), 7.73-7.68 (m, 3H), 7.46 (d, *J* = 6.0 Hz, 1H), 7.29 (d, *J* = 5.2 Hz, 1H), 2.92 (s, 3H) ppm. <sup>13</sup>C NMR (100 MHz, CDCl<sub>3</sub>): δ = 142.4, 140.6, 139.4, 138.4, 136.9, 135.2, 131.9, 130.2, 128.5, 127.1, 123.3, 119.4, 43.7 ppm. HRMS (ESI): calcd for C<sub>13</sub>H<sub>11</sub><sup>81</sup>BrNOS<sub>3</sub> [M+H]<sup>+</sup> 373.9160, found 373.9153; calcd for C<sub>13</sub>H<sub>11</sub><sup>79</sup>BrNOS<sub>3</sub> [M+H]<sup>+</sup> 371.9181, found 371.9176.

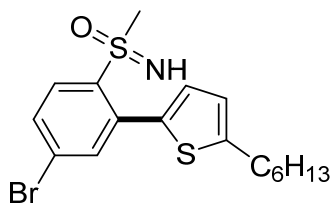

**2-(5-Bromo-2-(S-methylsulfonimidoyl)phenyl)-5-hexylthiophene (3j)**

Following the general procedure. Purification *via* column chromatography on silica gel (petroleum ether/EtOAc = 2/1, v/v) afforded **3j** as a yellow solid (21.2 mg, 53% yield). <sup>1</sup>H NMR (400 MHz, CDCl<sub>3</sub>): δ = 8.07 (d, *J* = 8.4 Hz, 1H), 7.65-7.61 (m, 2H), 7.28 (d, *J* = 3.2 Hz, 1H), 6.78 (d, *J* = 3.6 Hz, 1H), 2.87 (s, 3H), 2.84 (t, *J* = 7.6 Hz, 2H), 1.73-1.66 (m, 2H), 1.40-1.25 (m, 6H), 0.91-0.88 (m, 3H) ppm. <sup>13</sup>C NMR (100 MHz, CDCl<sub>3</sub>): δ = 149.0, 142.2, 136.7, 135.7, 134.2, 131.2, 130.8, 130.0, 126.9, 124.7, 43.4, 31.7, 31.7, 30.2, 28.9, 22.7, 14.2 ppm. HRMS (ESI): calcd for C<sub>17</sub>H<sub>23</sub><sup>81</sup>BrNOS<sub>2</sub> [M+H]<sup>+</sup> 402.0378, found 402.0378; calcd for C<sub>17</sub>H<sub>23</sub><sup>79</sup>BrNOS<sub>2</sub> [M+H]<sup>+</sup> 400.0399, found 400.0399.

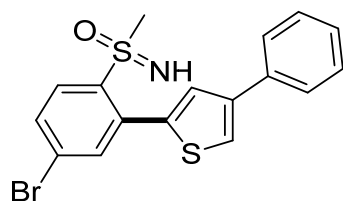

### 3-(5-Bromo-2-(S-methylsulfonimidoyl)phenyl)-4-phenylthiophene (3k)

Following the general procedure. Purification *via* column chromatography on silica gel (petroleum ether/EtOAc = 2/1, v/v) afforded **3k** as a yellow solid (18.8 mg, 48% yield).  $^1\text{H}$  NMR (400 MHz,  $\text{CDCl}_3$ ):  $\delta$  = 8.12 (d,  $J$  = 8.4 Hz, 1H), 7.77 (d,  $J$  = 1.2 Hz, 1H), 7.72-7.68 (m, 2H), 7.62-7.58 (m, 3H), 7.43-7.40 (m, 2H), 7.34-7.30 (m, 1H), 2.92 (s, 3H) ppm.  $^{13}\text{C}$  NMR (100 MHz,  $\text{CDCl}_3$ ):  $\delta$  = 142.6, 142.3, 138.0, 136.6, 135.3, 135.2, 131.8, 130.24, 130.15, 129.1, 127.7, 127.1, 126.6, 122.4, 43.8 ppm. HRMS (ESI): calcd for  $\text{C}_{17}\text{H}_{15}^{81}\text{BrNOS}_2$   $[\text{M}+\text{H}]^+$  393.9752, found 391.9736; calcd for  $\text{C}_{17}\text{H}_{15}^{79}\text{BrNOS}_2$   $[\text{M}+\text{H}]^+$  391.9773, found 391.9770.

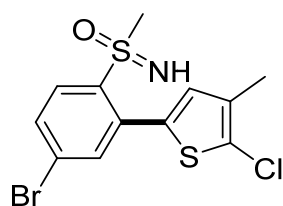

### 2-(5-Bromo-2-(S-methylsulfonimidoyl)phenyl)-2-chloro-3-methylthiophene (3l)

Following the general procedure. Purification *via* column chromatography on silica gel (petroleum ether/EtOAc = 2/1, v/v) afforded **3l** as a yellow solid (22.4 mg, 62% yield).  $^1\text{H}$  NMR (400 MHz,  $\text{CDCl}_3$ ):  $\delta$  = 8.08 (d,  $J$  = 8.8 Hz, 1H), 7.66 (dd,  $J$  = 8.8 Hz, 2.0 Hz, 1H), 7.61 (d,  $J$  = 2.0 Hz, 1H), 7.12 (s, 1H), 2.95 (s, 3H), 2.22 (s, 3H) ppm.  $^{13}\text{C}$  NMR (100 MHz,  $\text{CDCl}_3$ ):  $\delta$  = 142.2, 136.7, 134.9, 134.6, 133.4, 132.4, 131.9, 130.3, 127.5, 127.2, 43.8, 13.8 ppm. HRMS (ESI): calcd for  $\text{C}_{12}\text{H}_{11}^{81}\text{Br}^{37}\text{ClNNaOS}_2$   $[\text{M}+\text{Na}]^+$  389.8996, found 389.8999; calcd for  $\text{C}_{12}\text{H}_{11}^{81}\text{Br}^{35}\text{ClNNaOS}_2$   $[\text{M}+\text{Na}]^+$  387.9026, found 387.9028; calcd for  $\text{C}_{12}\text{H}_{11}^{79}\text{Br}^{37}\text{ClNNaOS}_2$   $[\text{M}+\text{Na}]^+$  387.9017, found 387.9018; calcd for  $\text{C}_{12}\text{H}_{11}^{79}\text{Br}^{35}\text{ClNNaOS}_2$   $[\text{M}+\text{Na}]^+$  385.9046, found 385.9045.

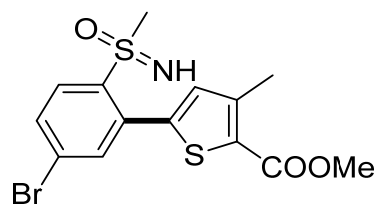

**Methyl 5-(5-bromo-2-(S-methylsulfonimidoyl)phenyl)-3-methylthiophene-2-carboxylate (3m)**

Following the general procedure. Purification *via* column chromatography on silica gel (petroleum ether/EtOAc = 2/1, v/v) afforded **3m** as a yellow solid (18.2 mg, 47% yield).  $^1\text{H}$  NMR (400 MHz,  $\text{CDCl}_3$ ):  $\delta$  = 8.11 (d,  $J$  = 8.8 Hz, 1H), 7.71 (dd,  $J$  = 8.4 Hz, 2.0 Hz, 1H), 7.63 (d,  $J$  = 2.0 Hz, 1H), 7.20 (s, 1H), 3.88 (s, 3H), 2.94 (s, 3H), 2.58 (s, 3H) ppm.  $^{13}\text{C}$  NMR (100 MHz,  $\text{CDCl}_3$ ):  $\delta$  = 162.9, 152.8, 146.2, 142.3, 141.6, 136.5, 134.9, 134.5, 132.4, 130.6, 127.2, 52.1, 44.4, 16.2 ppm. HRMS (ESI): calcd for  $\text{C}_{14}\text{H}_{15}^{81}\text{BrNO}_3\text{S}_2$   $[\text{M}+\text{H}]^+$  389.9651, found 389.9641; calcd for  $\text{C}_{14}\text{H}_{15}^{79}\text{BrNO}_3\text{S}_2$   $[\text{M}+\text{H}]^+$  387.9671, found 387.9670.

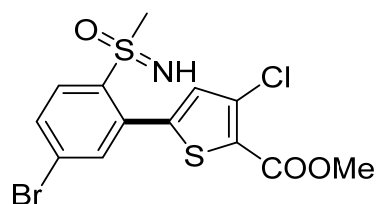

**Methyl 5-(5-bromo-2-(S-methylsulfonimidoyl)phenyl)-3-chlorothiophene-2-carboxylate (3n)**

Following the general procedure. Purification *via* column chromatography on silica gel (petroleum ether/EtOAc = 2/1, v/v) afforded **3n** as a yellow solid (23.8 mg, 58% yield).  $^1\text{H}$  NMR (400 MHz,  $\text{CDCl}_3$ ):  $\delta$  = 8.13 (d,  $J$  = 8.4 Hz, 1H), 7.75 (d,  $J$  = 8.4 Hz, 1H), 7.63 (s, 1H), 7.30 (s, 1H), 3.91 (s, 3H), 2.97 (s, 3H) ppm.  $^{13}\text{C}$  NMR (100 MHz,  $\text{CDCl}_3$ ):  $\delta$  = 160.8, 142.3, 142.2, 136.4, 133.3, 133.1, 132.8, 131.1, 131.0, 127.5, 127.2, 52.6, 44.8 ppm. HRMS (ESI): calcd for  $\text{C}_{13}\text{H}_{12}^{81}\text{Br}^{37}\text{ClNO}_3\text{S}_2$   $[\text{M}+\text{H}]^+$  411.9075, found 411.9062; calcd for  $\text{C}_{13}\text{H}_{12}^{79}\text{Br}^{37}\text{ClNO}_3\text{S}_2$   $[\text{M}+\text{H}]^+$  409.9096, found 409.9091; calcd for  $\text{C}_{13}\text{H}_{12}^{79}\text{Br}^{35}\text{ClNO}_3\text{S}_2$   $[\text{M}+\text{H}]^+$  407.9125, found 407.9125.

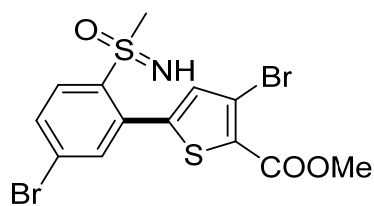

**Methyl 3-bromo-5-(5-bromo-2-(S-methylsulfonimidoyl)phenyl)thiophene-2-carboxylate (3o)**

Following the general procedure. Purification *via* column chromatography on silica gel (petroleum ether/EtOAc = 2/1, v/v) afforded **3o** as a yellow solid (29.3 mg, 65% yield). <sup>1</sup>H NMR (400 MHz, CDCl<sub>3</sub>): δ = 8.13 (d, *J* = 8.8 Hz, 1H), 7.75 (dd, *J* = 8.8 Hz, 2.0 Hz, 1H), 7.63 (d, *J* = 2.0 Hz, 1H), 7.35 (s, 1H), 3.92 (s, 3H), 2.97 (s, 3H) ppm. <sup>13</sup>C NMR (100 MHz, CDCl<sub>3</sub>): δ = 160.9, 143.2, 142.3, 136.4, 135.4, 133.2, 133.1, 131.0, 128.8, 127.5, 116.6, 52.6, 44.8 ppm. HRMS (ESI): calcd for C<sub>13</sub>H<sub>12</sub><sup>81</sup>Br<sup>81</sup>BrNO<sub>3</sub>S<sub>2</sub> [M+H]<sup>+</sup> 455.8579, found 455.8578; calcd for C<sub>13</sub>H<sub>12</sub><sup>81</sup>Br<sup>79</sup>BrNO<sub>3</sub>S<sub>2</sub> [M+H]<sup>+</sup> 453.8599, found 453.8600; calcd for C<sub>13</sub>H<sub>12</sub><sup>79</sup>Br<sup>79</sup>BrNO<sub>3</sub>S<sub>2</sub> [M+H]<sup>+</sup> 451.8620, found 451.8619.

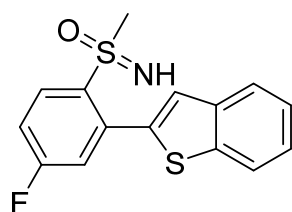

**2-(5-Fluoro-2-(S-methylsulfonimidoyl)phenyl)benzo[b]thiophene (3p)**

Following the general procedure. Purification *via* column chromatography on silica gel (petroleum ether/EtOAc = 2/1, v/v) afforded **3p** as a yellow solid (10.4 mg, 34% yield). <sup>1</sup>H NMR (400 MHz, CDCl<sub>3</sub>): δ = 8.32-8.29 (m, 1H), 7.87-7.84 (m, 2H), 7.70 (s, 1H), 7.44-7.38 (m, 2H), 7.31-7.24 (m, 2H), 2.94 (s, 3H). <sup>13</sup>C NMR (100 MHz, CDCl<sub>3</sub>): δ = 164.0 (d, *J*<sub>C-F</sub> = 249.9 Hz), 141.7, 140.3, 139.3 (d, *J*<sub>C-F</sub> = 9.6 Hz), 131.7 (d, *J*<sub>C-F</sub> = 9.3 Hz), 130.6, 127.3, 125.2, 125.1, 124.9, 124.4 122.0, 121.1 (d, *J*<sub>C-F</sub> = 22.8 Hz), 115.7 (d, *J*<sub>C-F</sub> = 21.2 Hz), 44.0. HRMS (ESI): calcd for C<sub>15</sub>H<sub>12</sub>FNNaOS<sub>2</sub> [M+Na]<sup>+</sup> 328.0237, found 328.0240.



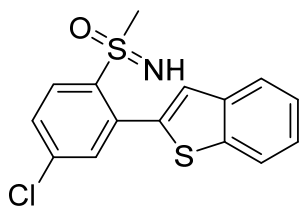

**2-(5-Chloro-2-(S-methylsulfonimidoyl)phenyl)benzo[b]thiophene (3q)**

Following the general procedure. Purification *via* column chromatography on silica gel (petroleum ether/EtOAc = 2/1, v/v) afforded **3q** as a yellow solid (24.1 mg, 75% yield). <sup>1</sup>H NMR (400 MHz, CDCl<sub>3</sub>): δ = 8.21 (d, *J* = 8.8 Hz, 1H), 7.85 (t, *J* = 6.4 Hz, 2H), 7.68 (s, 1H), 7.58-7.53 (m, 2H), 7.44-7.38 (m, 2H), 2.93 (s, 3H) ppm. <sup>13</sup>C NMR (100 MHz, CDCl<sub>3</sub>): δ = 141.9, 140.5, 139.5, 138.7, 137.3, 135.2, 133.9, 130.4, 129.0, 127.6, 125.4, 125.1, 124.6, 122.1, 44.1 ppm. HRMS (ESI): calcd for C<sub>15</sub>H<sub>13</sub><sup>37</sup>ClNOS<sub>2</sub> [M+H]<sup>+</sup> 324.0092, found 324.0091; calcd for C<sub>15</sub>H<sub>13</sub><sup>35</sup>ClNOS<sub>2</sub> [M+H]<sup>+</sup> 322.0122, found 322.0119.

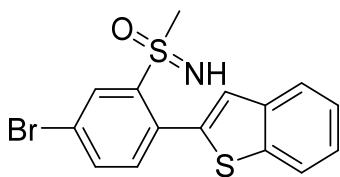

**2-(4-Bromo-2-(S-methylsulfonimidoyl)phenyl)benzo[b]thiophene (3r)**

Following the general procedure. Purification *via* column chromatography on silica gel (petroleum ether/EtOAc = 2/1, v/v) afforded **3r** as a yellow solid (18.6 mg, 51% yield). <sup>1</sup>H NMR (400 MHz, CDCl<sub>3</sub>): δ = 8.41 (d, *J* = 2.0 Hz, 1H), 7.86-7.83 (m, 2H), 7.74 (dd, *J* = 8.0 Hz, 2.0 Hz, 1H), 7.66 (s, 1H), 7.46-7.37 (m, 3H), 2.95 (s, 3H) ppm. <sup>13</sup>C NMR (100 MHz, CDCl<sub>3</sub>): δ = 135.6, 135.4, 131.7, 130.3, 130.3, 127.5, 125.3, 125.1, 124.9, 124.6, 124.5, 123.3, 122.5, 122.1, 53.7 ppm. HRMS (ESI): calcd for C<sub>15</sub>H<sub>13</sub><sup>81</sup>BrNOS<sub>2</sub> [M+H]<sup>+</sup> 367.9596, found 367.9570; calcd for C<sub>15</sub>H<sub>13</sub><sup>79</sup>BrNOS<sub>2</sub> [M+H]<sup>+</sup> 365.9616, found 365.9614.

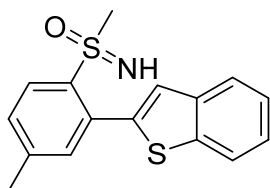

### 2-(5-Methyl-2-(*S*-methylsulfonimidoyl)phenyl)benzo[*b*]thiophene (3s)

Following the general procedure. Purification *via* column chromatography on silica gel (petroleum ether/EtOAc = 2/1, v/v) afforded **3s** as a yellow solid (19.3 mg, 64% yield). <sup>1</sup>H NMR (400 MHz, CDCl<sub>3</sub>): δ = 8.14 (d, *J* = 8.0 Hz, 1H), 7.86-7.82 (m, 2H), 7.64 (s, 1H), 7.42-7.35 (m, 4H), 2.94 (s, 3H), 2.45 (s, 3H) ppm. <sup>13</sup>C NMR (100 MHz, CDCl<sub>3</sub>): δ = 143.2, 140.48, 140.45, 139.7, 139.1, 134.8, 133.3, 129.6, 128.9, 126.9, 125.0, 124.8, 124.3, 122.0, 44.2, 21.4 ppm. HRMS (ESI): calcd for C<sub>16</sub>H<sub>16</sub>NOS<sub>2</sub> [M+H]<sup>+</sup> 302.0668, found 302.0683.

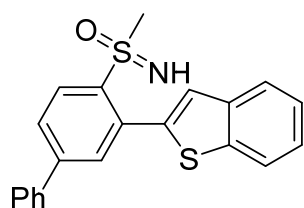

### 2-(4-(*S*-Methylsulfonimidoyl)-[1,1'-biphenyl]-3-yl)benzo[*b*]thiophene (3t)

Following the general procedure. Purification *via* column chromatography on silica gel (petroleum ether/EtOAc = 2/1, v/v) afforded **3t** as a yellow solid (23.1 mg, 64% yield). <sup>1</sup>H NMR (400 MHz, CDCl<sub>3</sub>): δ = 8.32 (d, *J* = 8.4 Hz, 1H), 7.87-7.82 (m, 2H), 7.80-7.77 (m, 2H), 7.71 (s, 1H), 7.63 (d, *J* = 7.6 Hz, 2H), 7.50-7.37 (m, 5H), 3.00 (s, 3H) ppm. <sup>13</sup>C NMR (100 MHz, CDCl<sub>3</sub>): δ = 145.4, 142.8, 141.8, 138.9, 138.0, 134.0, 132.9, 129.5, 129.3, 128.9, 127.5, 127.4, 127.2, 125.1, 125.0, 124.4, 122.1, 120.6, 44.3 ppm. C<sub>21</sub>H<sub>18</sub>NOS<sub>2</sub> [M+H]<sup>+</sup> 364.0824, found 364.0826.

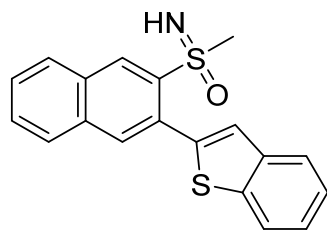

### 2-(3-(*S*-Methylsulfonimidoyl)naphthalen-2-yl)benzo[*b*]thiophene (3u)

Following the general procedure. Purification *via* column chromatography on silica gel (petroleum ether/EtOAc = 2/1, v/v) afforded **3u** as a yellow solid (22.3 mg, 66% yield). <sup>1</sup>H NMR (400 MHz, CDCl<sub>3</sub>): δ = 8.82 (s, 1H), 8.06-8.04 (m, 2H), 7.92 (d, *J* = 7.2 Hz, 1H), 7.88-7.85 (m, 2H), 7.73 (s, 1H), 7.72-7.65 (m, 2H), 7.44-7.38 (m, 2H), 3.01 (s, 3H)

ppm.  $^{13}\text{C}$  NMR (100 MHz,  $\text{CDCl}_3$ ):  $\delta = 140.5, 139.8, 139.5, 139.1, 134.3, 134.2, 131.9, 130.3, 129.7, 129.3, 128.9, 128.4, 127.9, 127.4, 125.0, 124.9, 124.4, 122.0, 44.1$  ppm. HRMS (ESI): calcd for  $\text{C}_{19}\text{H}_{16}\text{NOS}_2$   $[\text{M}+\text{H}]^+$  338.0668, found 338.0667.

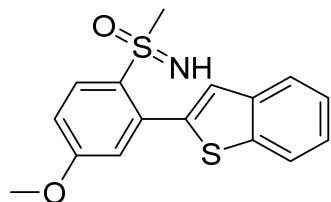

### 2-(5-Methoxy-2-(*S*-methylsulfonylimidoyl)phenyl)benzo[*b*]thiophene (**3v**)

Following the general procedure. Purification *via* column chromatography on silica gel (petroleum ether/EtOAc = 2/1, v/v) afforded **3v** as a yellow solid (16.5 mg, 52% yield).  $^1\text{H}$  NMR (400 MHz,  $\text{CDCl}_3$ ):  $\delta = 8.20$  (d,  $J = 8.8$  Hz, 1H), 7.85-7.82 (m, 2H), 7.64 (s, 1H), 7.42-7.35 (m, 2H), 7.07-7.02 (m, 2H), 3.89 (s, 3H), 2.93 (s, 3H) ppm.  $^{13}\text{C}$  NMR (100 MHz,  $\text{CDCl}_3$ ):  $\delta = 162.2, 140.4, 139.6, 138.9, 135.4, 135.1, 131.3, 126.8, 125.0, 124.9, 124.4, 122.1, 119.7, 113.7, 55.9, 44.6$  ppm. HRMS (ESI): calcd for  $\text{C}_{16}\text{H}_{15}\text{NNaO}_2\text{S}_2$   $[\text{M}+\text{Na}]^+$  340.0436, found 340.0433.

## V. Mechanistic studies

### Scheme S1. H/D exchange experiments of **1a**

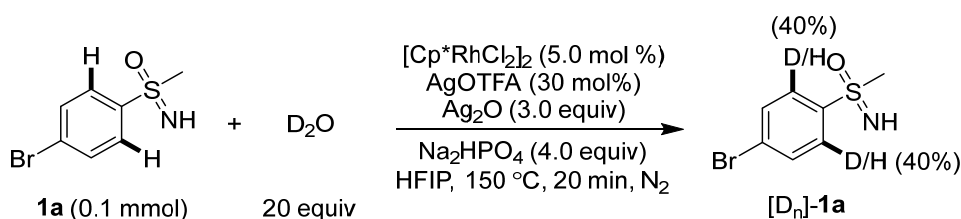

A flame-dried Schlenk with a magnetic stir bar was charged with  $[\text{Cp}^*\text{RhCl}_2]_2$  (3.1 mg,  $5 \mu\text{mol}$ ),  $\text{Ag}_2\text{O}$  (69.5 mg, 0.3 mmol),  $\text{AgOTFA}$  (6.6 mg,  $30 \mu\text{mol}$ ),  $\text{Na}_2\text{HPO}_4$  (56.8 mg, 0.4 mmol), *S*-(4-bromophenyl)-*S*-methyl sulfoximine (**1a**, 0.1 mmol) and  $\text{D}_2\text{O}$  (20 equiv) in HFIP (1 mL) under an  $\text{N}_2$  atmosphere. The resulting mixture was stirred at  $150 \text{ }^\circ\text{C}$  in oil bath for 20 min and then diluted with 5 mL of dichloromethane. The solution was filtered through a celite pad and washed with 10-20 mL of dichloromethane. The filtrate was concentrated and the residue was purified by column chromatography on silica gel to provide the desired product. The deuterated ratio was

calculated from  $^1\text{H}$  NMR analysis.

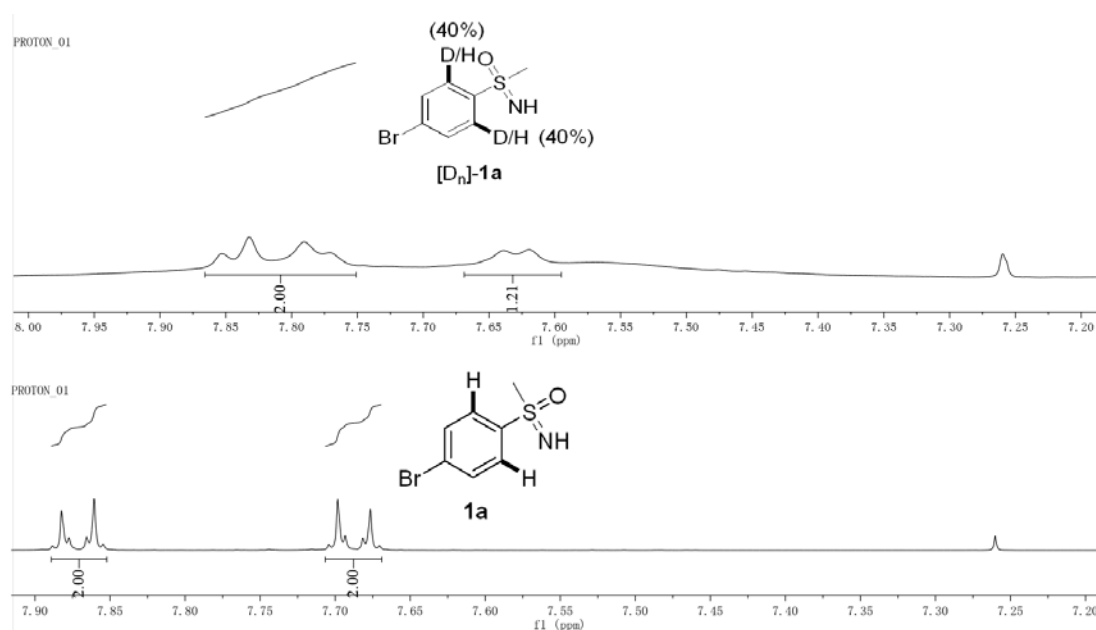

**Fig. S1.** H/D exchange experiments of **1a**

**Scheme S2.** H/D exchange experiments of **2a**

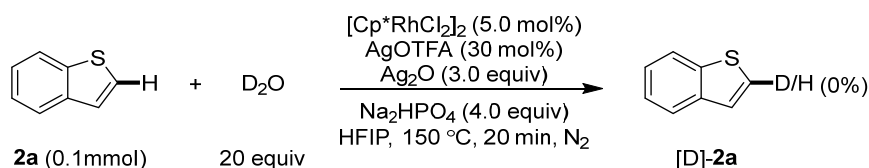

A flame-dried Schlenk with a magnetic stir bar was charged with  $[\text{Cp}^*\text{RhCl}_2]_2$  (3.1 mg,  $5.0\text{ }\mu\text{mol}$ ),  $\text{Ag}_2\text{O}$  (69.5 mg, 0.3 mmol), AgOTFA (6.6 mg,  $30.0\text{ }\mu\text{mol}$ ),  $\text{Na}_2\text{HPO}_4$  (56.8 mg, 0.4 mmol), benzo[*b*]thiophene (**2a**, 0.1 mmol) and  $\text{D}_2\text{O}$  (20.0 equiv) in HFIP (1.0 mL) under an  $\text{N}_2$  atmosphere. The resulting mixture was stirred at  $150\text{ }^\circ\text{C}$  in oil bath for 20 min and then diluted with 5 mL of dichloromethane. The solution was filtered through a celite pad and washed with 10-20 mL of dichloromethane. The filtrate was concentrated and the residue was purified by column chromatography on silica gel to provide the desired product. The deuterated ratio was calculated from  $^1\text{H}$  NMR analysis.

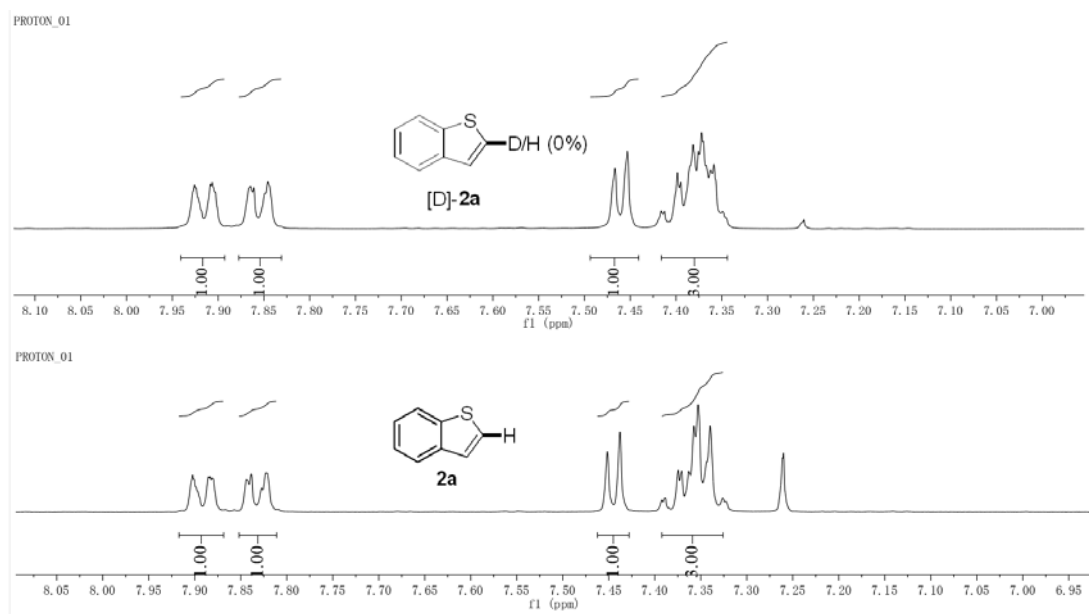

**Fig. S2.** H/D exchange experiments of **2a**

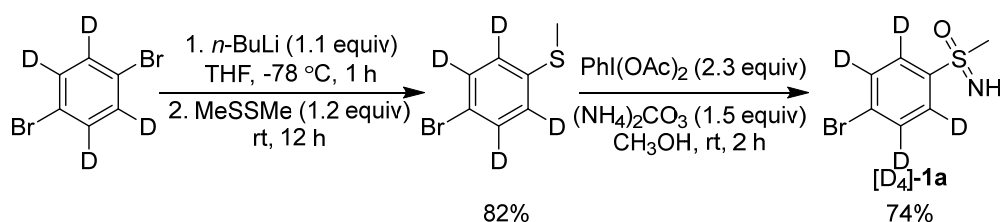

**Synthesis of [D<sub>4</sub>]-1a:** A flame-dried two-neck round-bottom flask with a magnetic stir bar was charged with 1,4-dibromobenzene-*d*<sub>4</sub> (10.0 mmol) and THF (20.0 mL) under an N<sub>2</sub> atmosphere. The solution was cooled to -78 °C and *n*-BuLi (2.5 mol/L in hexane, 11.0 mmol, 1.1 equiv) was added dropwise. After stirring for 1 h at -78 °C, dimethyl disulfide (12.0 mmol, 1.2 equiv) was added. The mixture was allowed to stir overnight, and 1.0 M HCl aq. was added. The organic layer was separated, washed with H<sub>2</sub>O and saturated aqueous NaHCO<sub>3</sub> solution, dried over Na<sub>2</sub>SO<sub>4</sub>, and concentrated in vacuo. Column chromatography (eluent: hexane) was performed to give 4-bromothioanisole-*d*<sub>4</sub> as white solid (1.7 g, 82% yield).

To a 50 mL round bottom flask equipped with a suitable magnetic stir bar, (NH<sub>4</sub>)<sub>2</sub>CO<sub>3</sub> (0.288 g, 1.5 equiv) was added the stirred solution of 4-bromothioanisole-*d*<sub>4</sub> (2.0 mmol, 1.0 equiv) in MeOH (20.0 mL). After stirred five minutes, PhI(OAc)<sub>2</sub> (1.482 g, 2.3 equiv) was added and the solution was stirred at room temperature for 2 h. After disappearance of the raw material detected by TLC (petroleum ether/EtOAc =

1:1), the solvent was removed under reduced pressure. Column chromatography (eluent: petroleum ether/EtOAc = 1/1) was performed to give [D<sub>4</sub>]-**1a** as white solid (348 mg, 74% yield). <sup>1</sup>H NMR (400 MHz, CDCl<sub>3</sub>): δ = 3.10 (s, 3H) ppm. <sup>13</sup>C NMR (100 MHz, CDCl<sub>3</sub>): δ = 142.4, 132.2 (t, *J*<sub>C-D</sub> = 24.9 Hz), 129.0 (t, *J*<sub>C-D</sub> = 25.9 Hz), 128.2, 46.2 ppm. HRMS (ESI): calcd for C<sub>7</sub>H<sub>5</sub>D<sub>4</sub><sup>81</sup>BrNOS<sub>2</sub> [M+H]<sup>+</sup> 239.9813, found 239.9794; calcd for C<sub>7</sub>H<sub>5</sub>D<sub>4</sub><sup>79</sup>BrNOS<sub>2</sub> [M+H]<sup>+</sup> 237.9834, found 237.9815.

**Scheme S3.** Kinetic isotope experiments of **1a**

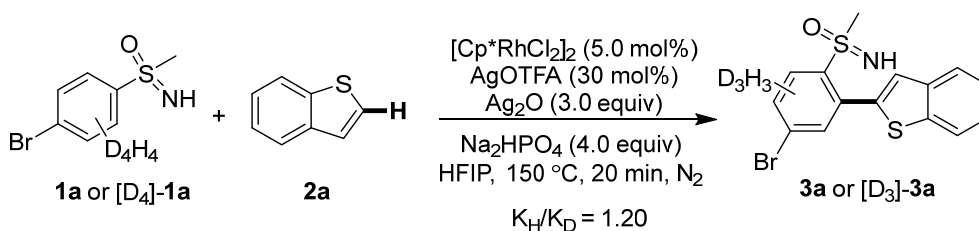

A flame-dried Schlenk with a magnetic stir bar was charged with [Cp\**RhCl*<sub>2</sub>]<sub>2</sub> (3.1 mg, 5.0 μmol), Ag<sub>2</sub>O (69.5 mg, 0.3 mmol), AgOTFA (6.6 mg, 30.0 μmol), Na<sub>2</sub>HPO<sub>4</sub> (56.8 mg, 0.4 mmol), **1a** or [D<sub>4</sub>]-**1a** (0.3 mmol), benzo[*b*]thiophene (**2a**, 0.1 mmol) in HFIP (1.0 mL) under an N<sub>2</sub> atmosphere. The resulting mixture was stirred at 150 °C in oil bath for indicated time and then diluted with 5.0 mL of dichloromethane. The solution was filtered through a celite pad and washed with 10-20 mL of dichloromethane. The filtrate was concentrated, and the residue was purified by column chromatography on silica gel to provide the desired product. The yield of **3a** was determined by <sup>1</sup>H NMR analysis of the crude product using dibromomethane (0.15 mmol, 10.5 μL) as internal standard. A kinetic isotope effect (KIE) value (*k*<sub>H</sub>/*k*<sub>D</sub> = 0.024/0.020 = 1.20) was obtained.

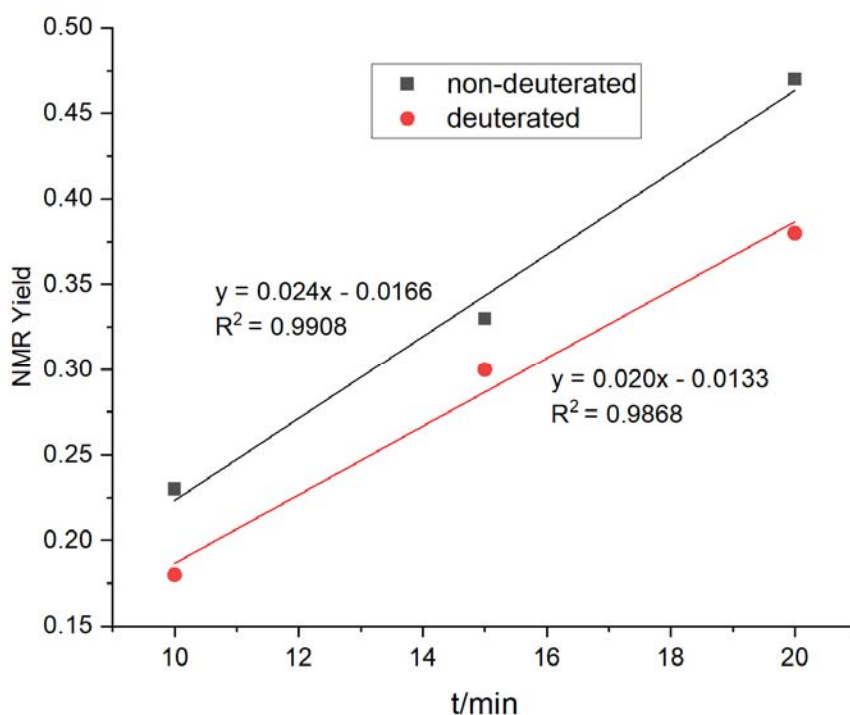

**Fig. S3.** Kinetic isotope experiments of **1a**

**Scheme S4.** Kinetic isotope experiments of **2a**

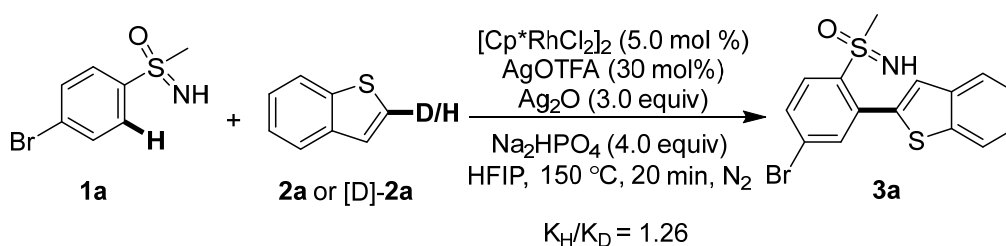

A flame-dried Schlenk with a magnetic stir bar was charged with  $[\text{Cp}^*\text{RhCl}_2]_2$  (3.1 mg, 5.0  $\mu\text{mol}$ ),  $\text{Ag}_2\text{O}$  (69.5 mg, 0.3 mmol), AgOTFA (6.6 mg, 30.0  $\mu\text{mol}$ ),  $\text{Na}_2\text{HPO}_4$  (56.8 mg, 0.4 mmol), *S*-(4-bromophenyl)-*S*-methyl sulfoximine (**1a**, 0.3 mmol), benzo[*b*]thiophene (**2a**, 0.1 mmol) or deuterated benzothiophene (**[D<sub>1</sub>]-2a**, 0.1 mmol) in HFIP (1.0 mL) under an  $\text{N}_2$  atmosphere. The resulting mixture was stirred at 150 °C in oil bath for indicated time and then diluted with 5 mL of dichloromethane. The solution was filtered through a celite pad and washed with 10-20 mL of dichloromethane. The filtrate was concentrated, and the residue was purified by column chromatography on silica gel to provide the desired product. The yield of **3a** was determined by  $^1\text{H}$  NMR analysis of the crude product using dibromomethane (0.15 mmol, 10.5  $\mu\text{L}$ ) as internal standard. A kinetic isotope effect (KIE) value ( $k_{\text{H}}/k_{\text{D}}$  =

0.024/0.019 = 1.26) was obtained.

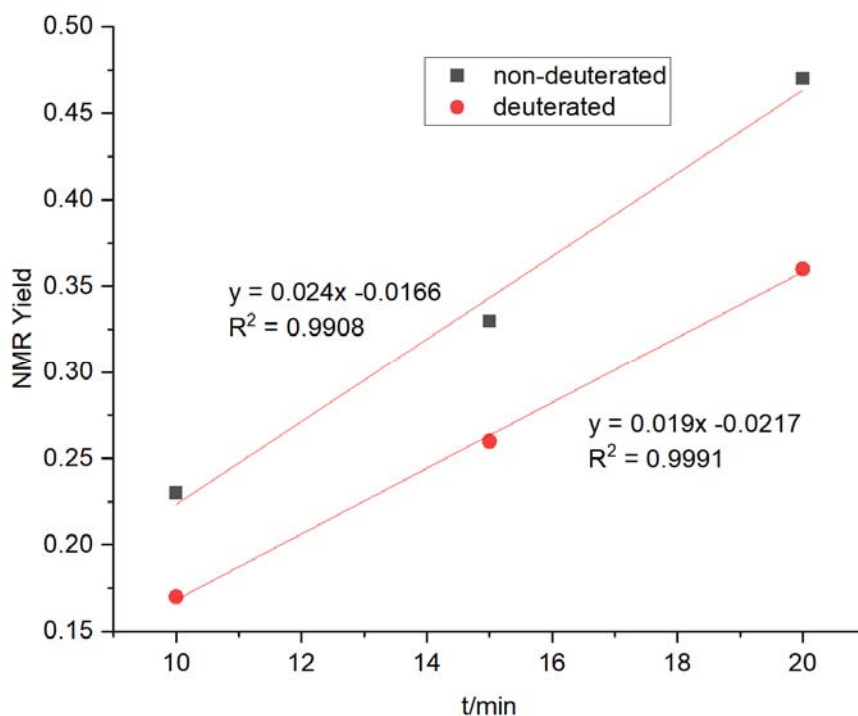

**Fig. S4.** Kinetic isotope experiments of **2a**

## VI. Synthesis of BTBT derivatives

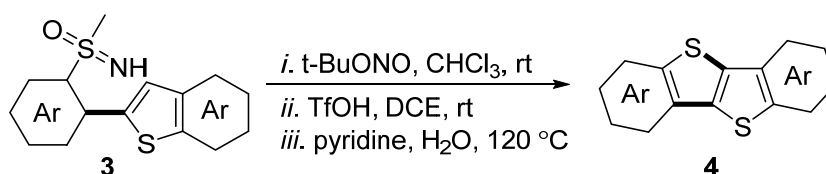

**Synthesis of 4:** **3** (0.1 mmol, 1.0 equiv) was dissolved in  $\text{CHCl}_3$  (2.0 mL) under air and  $t\text{-BuONO}$  (1.1 equiv) was added. The mixture was stirred at room temperature for 2 h. the solvent and  $t\text{-BuONO}$  were removed under reduced pressure. The residue was subjected to the next reaction without further purification.<sup>5</sup>

The corresponding crude sulfoxide was placed in a Schlenk tube and DCE (1.5 mL) was added. With continuous  $\text{N}_2$  streaming into the tube, TfOH (0.75 mL) was added dropwise. After stirring 24 hours at room temperature,  $\text{H}_2\text{O}$  (2.65 mL) and pyridine (0.35 mL) was charged, and the resulting mixture was stirred for 1 hour at 120 °C. The mixture was poured into 2.5 mL of 2 M aqueous HCl and diluted with  $\text{H}_2\text{O}$  and dichloromethane. The organic layer was separated, and the aqueous layer was extracted



with dichloromethane three times. The combined organic extracts was washed with H<sub>2</sub>O and brine, dried over Na<sub>2</sub>SO<sub>4</sub>, and concentrated in vacuo. The obtained crude material was purified through column chromatography (eluent: petroleum ether/EtOAc = 40/1) to give the cyclized product.<sup>6</sup>

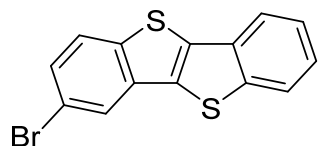

### 3-Bromobenzo[*b*]benzo[4,5]thieno[2,3-*d*]thiophene (**4a**)

Purification *via* column chromatography on silica gel (petroleum ether/EtOAc = 40/1, v/v) afforded **4a** as a white solid (20.4 mg, 64% yield). <sup>1</sup>H NMR (400 MHz, CDCl<sub>3</sub>): δ = 8.03 (s, 1H), 7.93 (d, *J* = 7.6 Hz, 1H), 7.89 (d, *J* = 8.0 Hz, 1H), 7.78 (d, *J* = 9.2 Hz, 1H), 7.51-7.42 (m, 3H) ppm. <sup>13</sup>C NMR (100 MHz, CDCl<sub>3</sub>): δ = 142.5, 140.9, 137.6, 135.0, 134.8, 132.9, 128.0, 125.6, 125.4, 125.2, 124.4, 124.2, 121.9, 119.0 ppm. HRMS (ESI): calcd for C<sub>14</sub>H<sub>8</sub><sup>79</sup>BrS<sub>2</sub> [M+H]<sup>+</sup> 318.9245, found 318.9251.

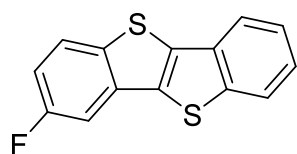

### 3-Fluorobenzo[*b*]benzo[4,5]thieno[2,3-*d*]thiophene (**4b**)

Purification *via* column chromatography on silica gel (petroleum ether/EtOAc = 40/1, v/v) afforded **4b** as a white solid (16.3 mg, 63% yield). <sup>1</sup>H NMR (400 MHz, CDCl<sub>3</sub>): δ = 7.92 (d, *J* = 8.0 Hz, 1H), 7.88 (d, *J* = 7.6 Hz, 1H), 7.84 (dd, *J* = 8.8 Hz, 4.8 Hz, 1H), 7.55 (dd, *J* = 9.2 Hz, 2.4 Hz, 1H), 7.49-7.41 (m, 2H), 7.16 (td, *J* = 8.8 Hz, 2.4 Hz, 1H) ppm. <sup>13</sup>C NMR (100 MHz, CDCl<sub>3</sub>): δ = 161.1 (d, *J*<sub>C-F</sub> = 241.7 Hz), 142.4, 137.5, 135.7, 134.1 (d, *J*<sub>C-F</sub> = 9.9 Hz), 133.0, 132.8 (d, *J*<sub>C-F</sub> = 4.3 Hz), 125.6, 125.2 (d, *J*<sub>C-F</sub> = 9.3 Hz), 125.1, 124.2, 121.9, 113.6 (d, *J*<sub>C-F</sub> = 24.8 Hz), 107.8 (d, *J*<sub>C-F</sub> = 24.0 Hz) ppm. HRMS (ESI): calcd for C<sub>14</sub>H<sub>8</sub>FS<sub>2</sub> [M+H]<sup>+</sup> 259.0046, found 259.0046. The <sup>1</sup>H NMR and <sup>13</sup>C NMR of **4b** are consistent with the previous report.<sup>7</sup>

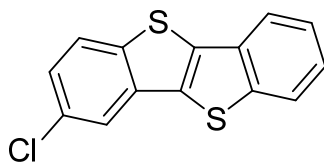

### 3-Chlorobenzo[*b*]benzo[4,5]thieno[2,3-*d*]thiophene (**4c**)

Purification *via* column chromatography on silica gel (petroleum ether/EtOAc = 40/1, v/v) afforded **4c** as a yellow solid (11.8 mg, 43% yield). <sup>1</sup>H NMR (400 MHz, CDCl<sub>3</sub>): δ = 7.94-7.81 (m, 4H), 7.49-7.41 (m, 2H), 7.36 (dd, *J* = 8.4 Hz, 1.6 Hz, 1H). ppm. <sup>13</sup>C NMR (100 MHz, CDCl<sub>3</sub>): δ = 142.5, 140.4, 135.2, 134.3, 132.9, 132.5, 131.3, 125.6, 125.4, 125.2, 125.1, 124.2, 121.9, 121.4 ppm. The <sup>1</sup>H NMR and <sup>13</sup>C NMR of **4c** are consistent with the previous report.<sup>8</sup>

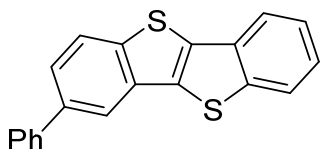

### 3-Phenylbenzo[*b*]benzo[4,5]thieno[2,3-*d*]thiophene (**4d**)

Purification *via* column chromatography on silica gel (petroleum ether/EtOAc = 40/1, v/v) afforded **4d** as a white solid (17.1 mg, 54% yield). <sup>1</sup>H NMR (400 MHz, CDCl<sub>3</sub>): δ = 8.06 (s, 1H), 7.97-7.88 (m, 3H), 7.70 (d, *J* = 7.6 Hz, 2H), 7.64 (d, *J* = 8.4 Hz, 1H), 7.50-7.36 (m, 5H) ppm. <sup>13</sup>C NMR (100 MHz, CDCl<sub>3</sub>): δ = 142.4, 141.4, 141.0, 140.3, 138.6, 134.2, 133.8, 133.6, 133.2, 129.0, 127.6, 125.2, 125.1, 124.7, 124.4, 124.2, 121.8, 120.1 ppm. HRMS (ESI): calcd for C<sub>20</sub>H<sub>13</sub>S<sub>2</sub> [M+H]<sup>+</sup> 317.0453, found 317.0451.

## VII. Synthesis of thermally activated delayed fluorescence molecules

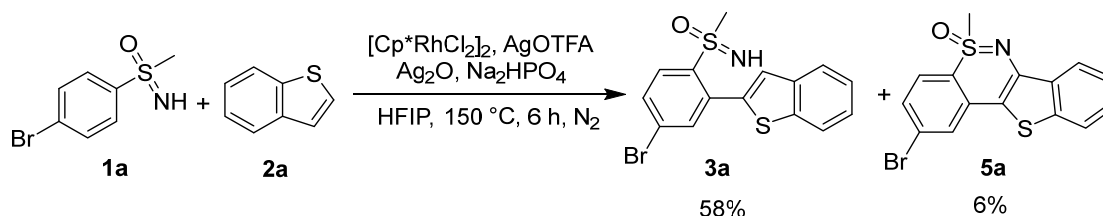

According to the conditions (Table S5, Entry 6). Purification *via* column chromatography on silica gel (petroleum ether/EtOAc) afforded **3a** as a yellow solid (21.2 mg, 58% yield) and **5a** as a yellow solid (2.2 mg, 6%).

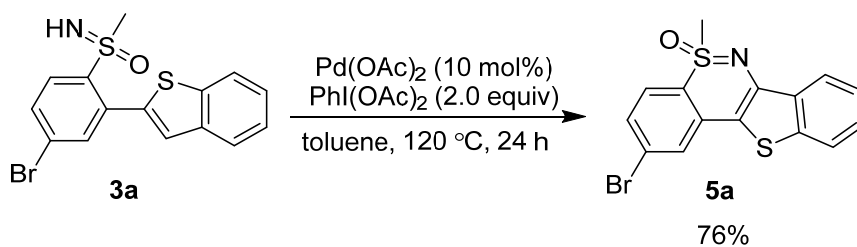

**Intramolecular annulation of 3a:** a Schlenk tube (25 mL) equipped with a stir bar was loaded with 2-(5-bromo-2-(*S*-methylsulfonylimidoyl)phenyl)benzo[*b*]thiophene **3a** (36.5 mg, 0.1 mmol), Pd(OAc)<sub>2</sub> (10 mol%) and PhI(OAc)<sub>2</sub> (2.0 equiv). Then, dry toluene (2.0 mL) was added, and the mixture was allowed to stir at 120 °C in oil bath for 24 h. After cooling to room temperature, the mixture was filtered through a short celite pad and washed with dichloromethane (3 × 20 mL). The filtrate was concentrated, and the product was purified by column chromatography using silica gel as stationary phase and a mixture of hexane and ethyl acetate as eluent to give pure product 2-bromo-5-methylbenzo[*e*]benzo[4,5]thieno[3,2-*c*][1,2]thiazine 5-oxide (**5a**) as a yellow solid (27.5 mg, 76% yield).<sup>9</sup> <sup>1</sup>H NMR (400 MHz, CDCl<sub>3</sub>): δ = 8.06-8.04 (m, 1H), 7.79-7.73 (m, 3H), 7.57 (dd, *J* = 8.4 Hz, 2.0 Hz, 1H), 7.46-7.39 (m, 2H), 3.63 (s, 3H) ppm. <sup>13</sup>C NMR (100 MHz, CDCl<sub>3</sub>): δ = 141.5, 138.2, 135.5, 134.2, 130.0, 128.4, 127.4, 126.8, 126.1, 124.7, 123.0, 122.9, 119.2, 109.5, 45.8 ppm. HRMS (ESI): calcd for C<sub>15</sub>H<sub>11</sub><sup>79</sup>BrNOS<sub>2</sub> [M+H]<sup>+</sup> 363.9460, found 363.9462.

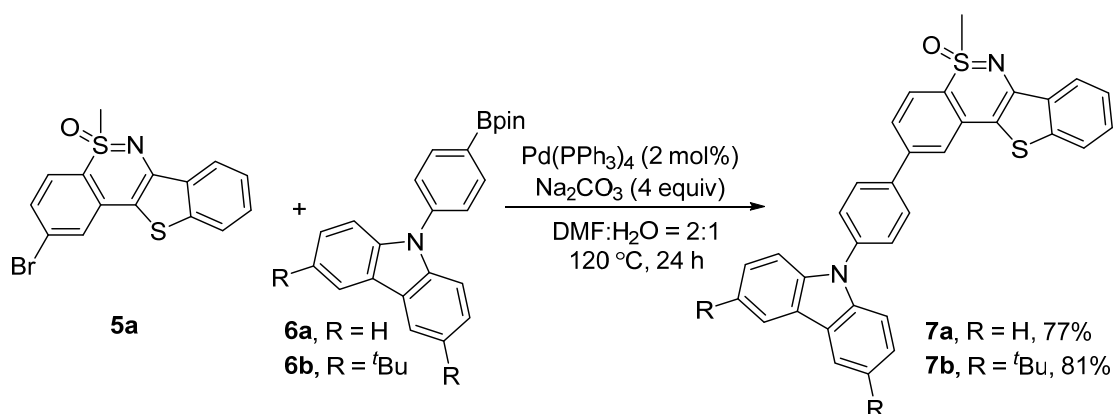

**Synthesis of 7:** a Schlenk tube with a magnetic stir bar was charged with Pd(PPh<sub>3</sub>)<sub>4</sub> (2.3 mg, 2.0 mol%), Na<sub>2</sub>CO<sub>3</sub> (42.4 mg, 4.0 equiv), **5a** (36.3 mg, 0.1 mmol, 1.0 equiv), aryl borates **6** (1.1 equiv, 0.11 mmol), DMF (1.4 mL) and H<sub>2</sub>O (0.7 mL) under an N<sub>2</sub> atmosphere. The resulting mixture was stirred at 120 °C in oil bath for 24 h and then

removes solvent under vacuum. The solution was filtered through a celite pad and washed with 10-25 mL of dichloromethane. The filtrate was concentrated under vacuum and the residue was purified by column chromatography on silica gel (petroleum ether/EtOAc = 5/1) to provide the desired product.<sup>10</sup>

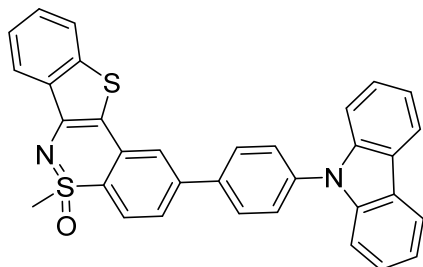

**2-(4-(9H-Carbazol-9-yl)phenyl)-5-methylbenzo[e]benzo[4,5]thieno[3,2-c][1,2]Thiazine 5-oxide (7a)**

Purification *via* column chromatography on silica gel (petroleum ether/EtOAc = 5/1, v/v) afforded **7a** as a yellow solid (38.9 mg, 74% yield). <sup>1</sup>H NMR (400 MHz, CDCl<sub>3</sub>):  $\delta$  = 8.18 (d, *J* = 7.6 Hz, 2H), 8.11-8.09 (m, 1H), 8.04 (d, *J* = 8.4 Hz, 1H), 7.94-7.92 (m, 2H), 7.84-7.75 (m, 5H), 7.53-7.43 (m, 6H), 7.33 (t, *J* = 7.6 Hz, 2H), 3.72 (s, 3H) ppm. <sup>13</sup>C NMR (100 MHz, CDCl<sub>3</sub>):  $\delta$  = 146.9, 145.6, 141.0, 141.0, 140.8, 129.2, 129.1, 127.8, 127.7, 127.1, 126.3, 126.2, 126.0, 125.5, 124.6, 123.7, 123.4, 123.0, 122.6, 120.61, 120.58, 120.4, 109.9, 109.8, 45.9 ppm. HRMS (ESI): calcd for C<sub>33</sub>H<sub>23</sub>N<sub>2</sub>OS<sub>2</sub> [M+H]<sup>+</sup> 527.1246, found 527.1245.

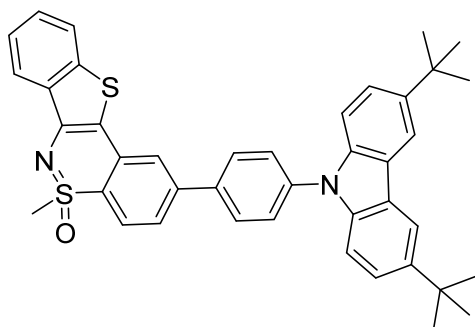

**2-(4-(3,6-Di-*tert*-butyl-9H-carbazol-9-yl)phenyl)-5-methylbenzo[e]benzo[4,5]thieno[3,2-c][1,2]thiazine 5-oxide (7b)**

Purification *via* column chromatography on silica gel (petroleum ether/EtOAc = 5/1, v/v) afforded **7b** as a yellow solid (51.7 mg, 81% yield). <sup>1</sup>H NMR (400 MHz, CDCl<sub>3</sub>):  $\delta$  = 8.17 (s, 2H), 8.11-8.08 (m, 1H), 8.03 (d, *J* = 8.4 Hz, 1H), 7.90 (d, *J* = 8.4 Hz, 2H),

7.84-7.78 (m, 3H), 7.74 (d,  $J = 8.4$  Hz, 2H), 7.52-7.42 (m, 6H), 3.72 (s, 3H), 1.49 (s, 18H) ppm.  $^{13}\text{C}$  NMR (100 MHz,  $\text{CDCl}_3$ ):  $\delta = 145.6, 145.5, 143.2, 138.9, 137.8, 137.5, 135.7, 133.1, 131.8, 128.8, 127.0, 126.9, 125.8, 125.2, 124.4, 123.9, 123.7, 123.6, 122.9, 122.8, 122.4, 119.4, 116.3, 109.2, 45.7, 34.8, 32.0$  ppm. HRMS (ESI): calcd for  $\text{C}_{41}\text{H}_{39}\text{N}_2\text{OS}_2$   $[\text{M}+\text{H}]^+$  639.2498, found 639.2493.

### VIII. Single-crystal X-ray structure of **3v**

**Table S6.** Crystal data and structure refinement for **3v**

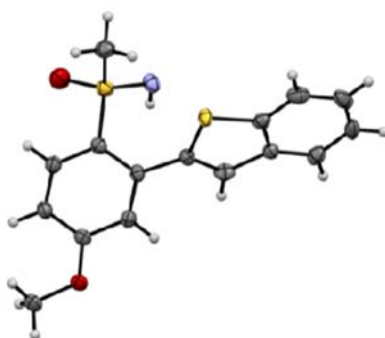

|                                  |                                                   |
|----------------------------------|---------------------------------------------------|
| Identification code              | <b>3v</b>                                         |
| Empirical formula                | $\text{C}_{16}\text{H}_{15}\text{NO}_2\text{S}_2$ |
| Formula weight                   | 317.41                                            |
| Temperature/K                    | 150.0                                             |
| Crystal system                   | monoclinic                                        |
| Space group                      | P21/c                                             |
| a/Å                              | 7.9599(3)                                         |
| b/Å                              | 11.6425(4)                                        |
| c/Å                              | 15.6846(4)                                        |
| $\alpha/^\circ$                  | 90                                                |
| $\beta/^\circ$                   | 95.3910(10)                                       |
| $\gamma/^\circ$                  | 90                                                |
| Volume/Å <sup>3</sup>            | 1447.11(8)                                        |
| Z                                | 4                                                 |
| $\rho_{\text{calc}}/\text{cm}^3$ | 1.457                                             |

|                                                |                                                              |
|------------------------------------------------|--------------------------------------------------------------|
| $\mu/\text{mm}^{-1}$                           | 0.371                                                        |
| F(000)                                         | 664.0                                                        |
| Crystal size/ $\text{mm}^3$                    | $0.43 \times 0.25 \times 0.17$                               |
| Radiation                                      | MoKa ( $\lambda = 0.71073$ )                                 |
| $2\Theta$ range for data collection/ $^\circ$  | 6.22 to 55.054                                               |
| Index ranges                                   | $-10 \leq h \leq 10, -15 \leq k \leq 15, -19 \leq l \leq 20$ |
| Reflections collected                          | 39620                                                        |
| Independent reflections                        | 3292 [Rint = 0.0821, Rsigma = 0.0370]                        |
| Data/restraints/parameters                     | 3292/7/215                                                   |
| Goodness-of-fit on $F_2$                       | 1.031                                                        |
| Final R indexes [ $I \geq 2\sigma(I)$ ]        | $R_1 = 0.0399, wR_2 = 0.0877$                                |
| Final R indexes [all data]                     | $R_1 = 0.0628, wR_2 = 0.0967$                                |
| Largest diff. peak/hole / $e \text{ \AA}^{-3}$ | 0.45/-0.36                                                   |

## IX. References

- (1) Y. Xie, B. Zhou, S. Zhou, S. Zhou, W. Wei, J. Liu, Y. Zhan, D. Cheng, M. Chen, Y. Li, B. Wang, X. Xue and Z. Li, *ChemistrySelect*, **2017**, *2*, 1620-1624.
- (2) H. L. Aalten, G. van Koten, D. M. Grove, T. Kuilman, O. G. Piekstra, L. A. Hulshof and R. A. Sheldon, *Tetrahedron*, **1989**, *45*, 5565-5578.
- (3) E. Zhang, J. Tang, S. Li, P. Wu, J. E. Moses and K. B. Sharpless, *Chem. Eur. J.*, **2016**, *22*, 5692-5697.
- (4) S. Lou and G. C. Fu, *Adv. Synth. Catal.*, **2010**, *352*, 2081-2084.
- (5) T. Zhou, P.-F. Qian, J.-Y. Li, Y.-B. Zhou, H. C. Li, H.-Y. Chen and B.-F. Shi, *J. Am. Chem. Soc.*, **2021**, *143*, 6810-6816.
- (6) S. Yang, R. Cheng, M. Zhang, Z. Bin and J. You, *ACS Catal.*, **2019**, *9*, 6188-6193.
- (7) K. Mitsudo, R. Matsuo, T. Yonezawa, H. Inoue, H. Mandai and S. Suga, *Angew. Chem. Int. Ed.* **2020**, *59*, 7803-7807.
- (8) K. Mitsudo, N. Habara, Y. Kobashi, Y. Kurimoto, H. Mandai and S. Suga, *Synlett*, **2020**, *31*, 1947-1952.
- (9) R. K. Chinnagolla, A. Vijeta and M. Jeganmohan, *Chem. Commun.*, **2015**, *51*, 12992-12995.
- (10) M. Wang, M. Zhang, Y. Luo, Z. Liu, C. Yang, J. Lan, D. Wu and J. You, *Org. Lett.*, **2020**, *22*, 135-139.

## X. Copies of $^1\text{H}$ and $^{13}\text{C}$ NMR spectra

$^1\text{H}$  NMR (400 MHz) spectrum of **3a** in  $\text{CDCl}_3$

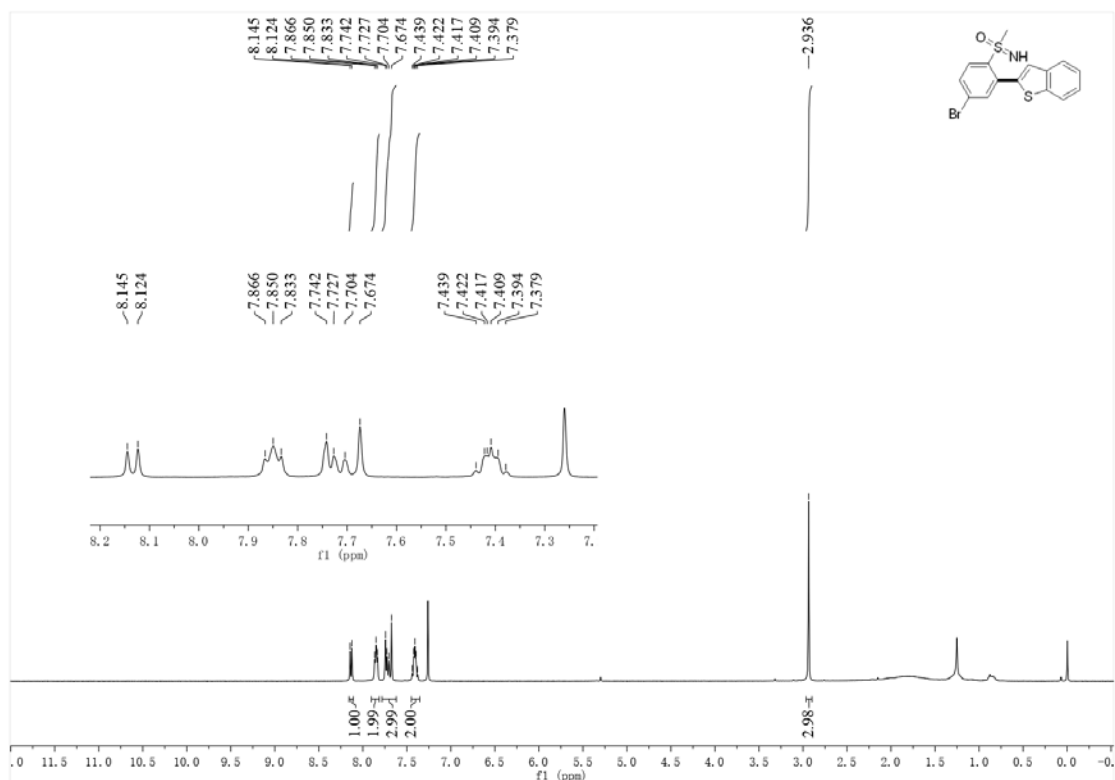

$^{13}\text{C}$  NMR (100 MHz) spectrum of **3a** in  $\text{CDCl}_3$

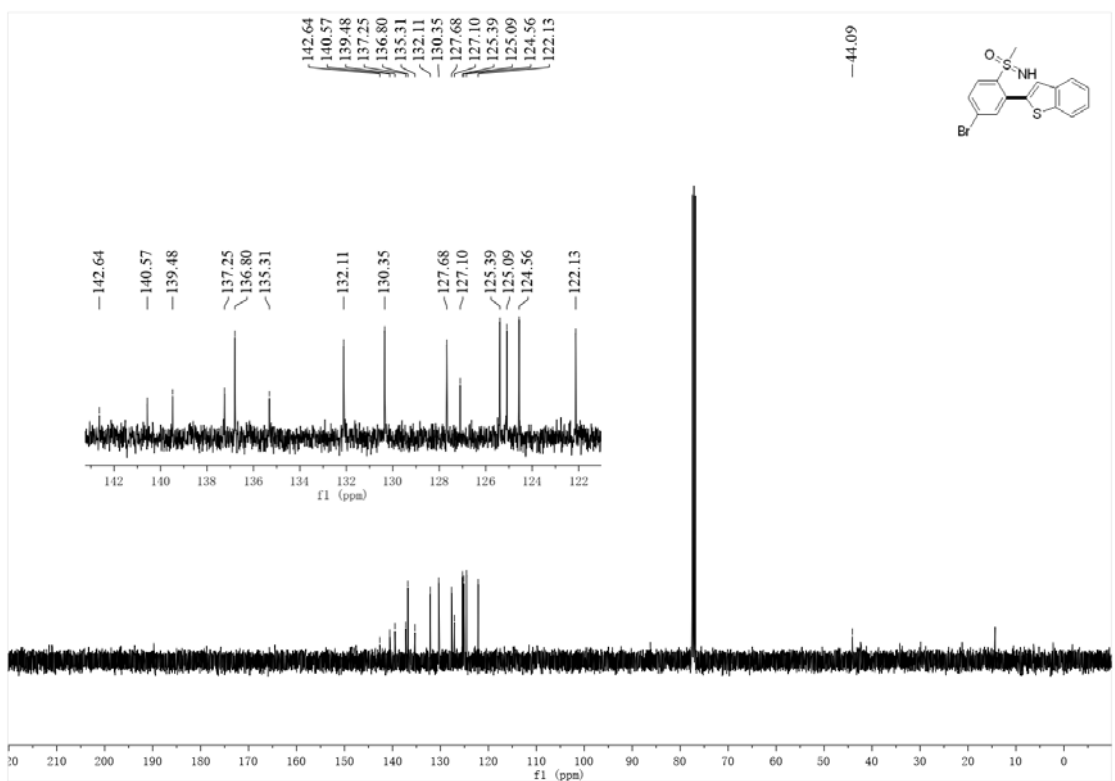



$^1\text{H}$  NMR (400 MHz) spectrum of **3b** in  $\text{CDCl}_3$

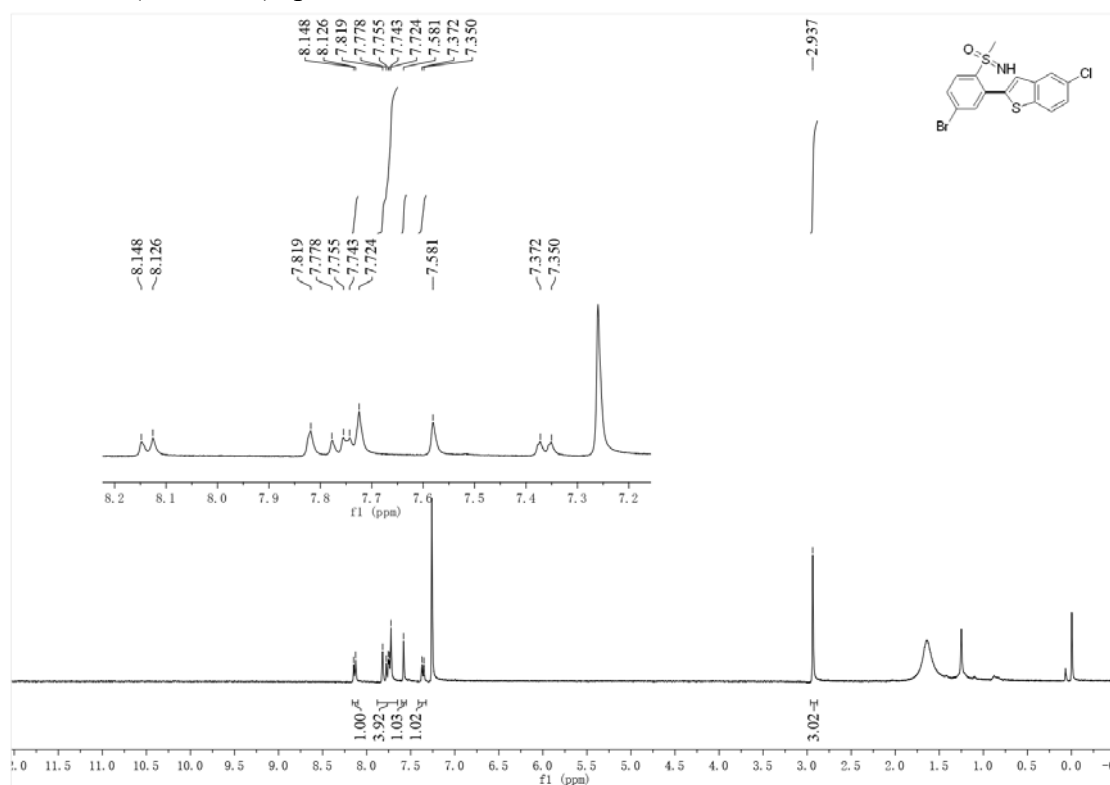

$^{13}\text{C}$  NMR (100 MHz) spectrum of **3b** in  $\text{CDCl}_3$

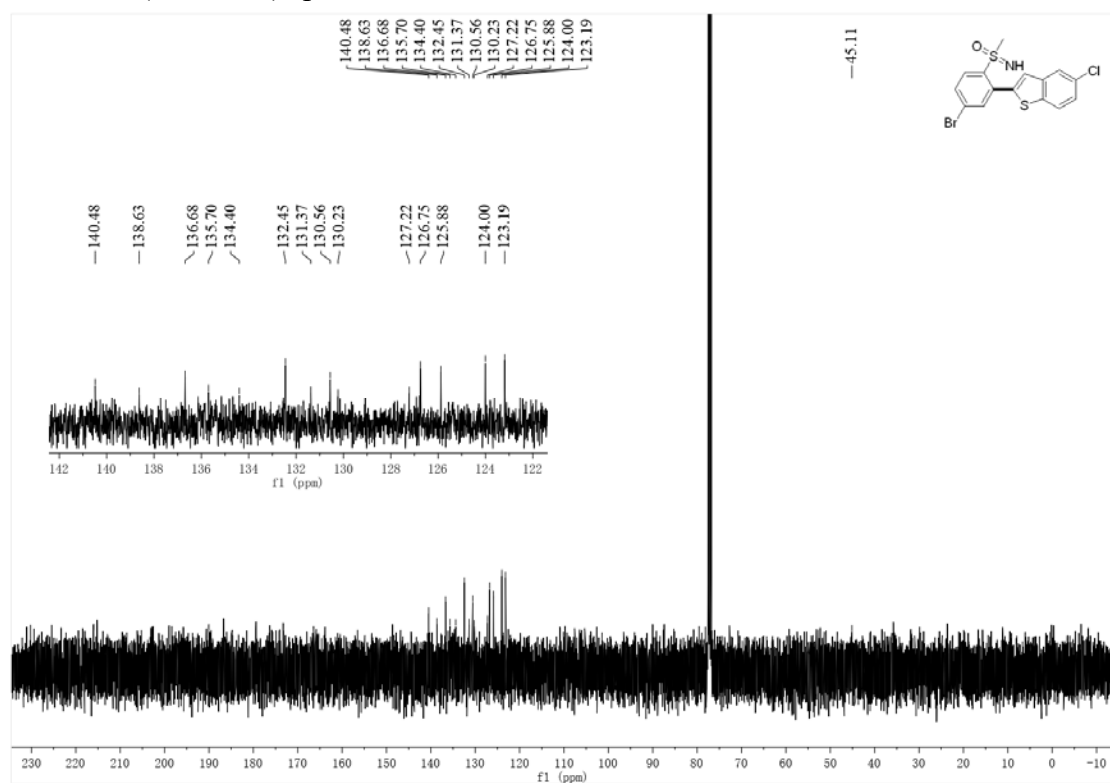

$^1\text{H}$  NMR (400 MHz) spectrum of **3c** in  $\text{CDCl}_3$

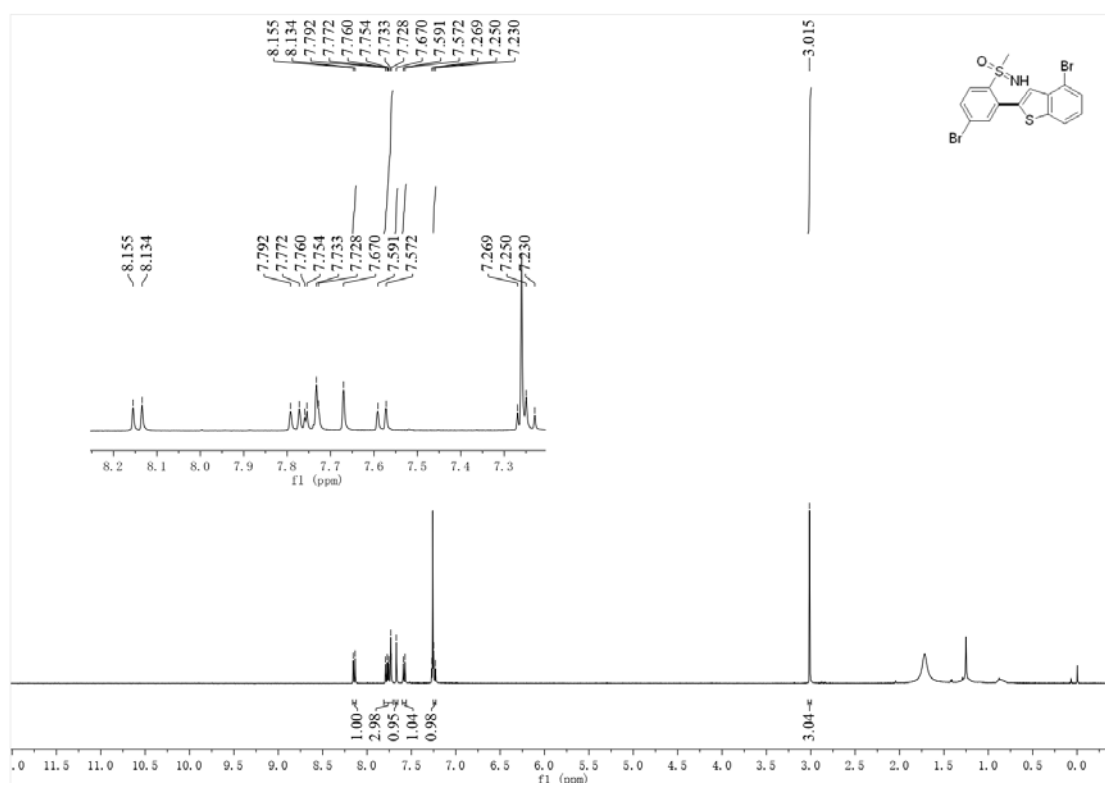

$^{13}\text{C}$  NMR (100 MHz) spectrum of **3c** in  $\text{CDCl}_3$

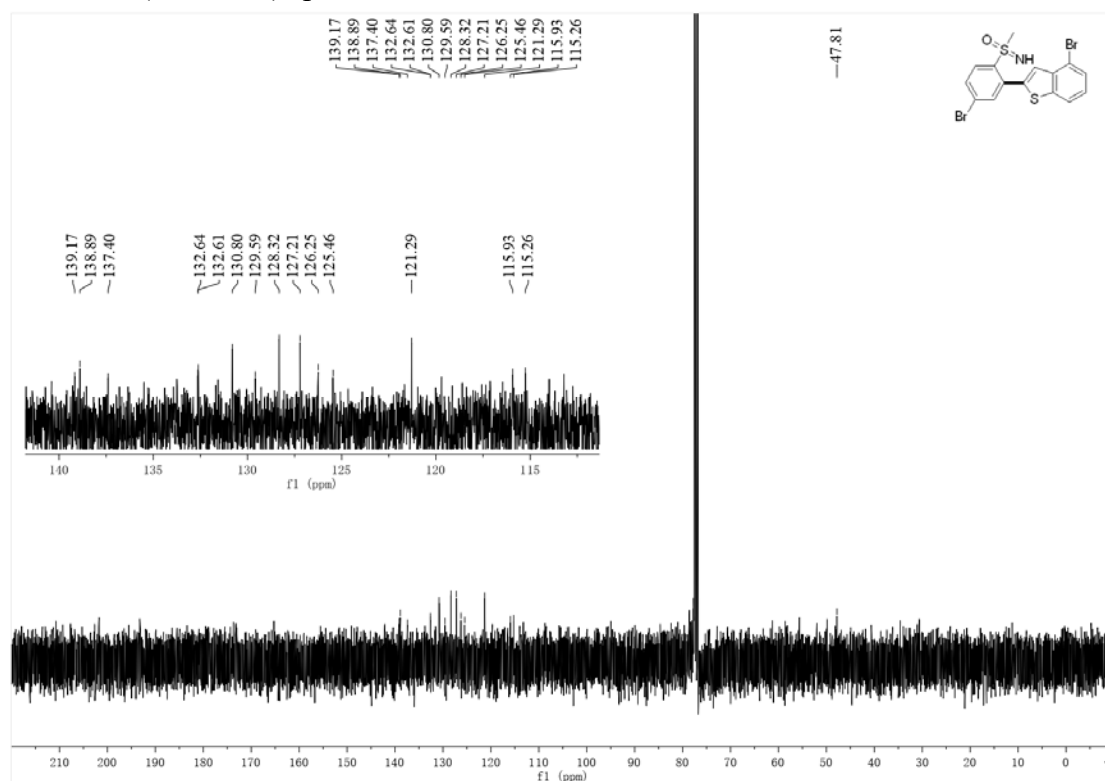

$^1\text{H}$  NMR (400 MHz) spectrum of **3d** in  $\text{CDCl}_3$

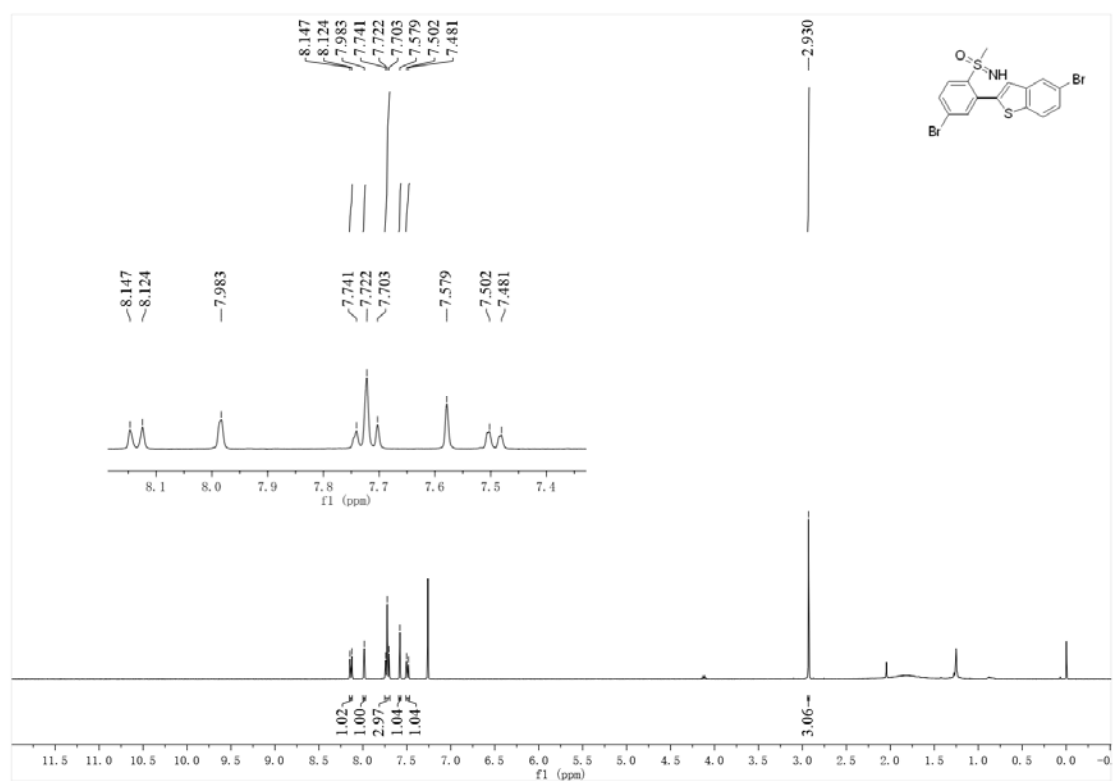

$^{13}\text{C}$  NMR (100 MHz) spectrum of **3d** in  $\text{CDCl}_3$

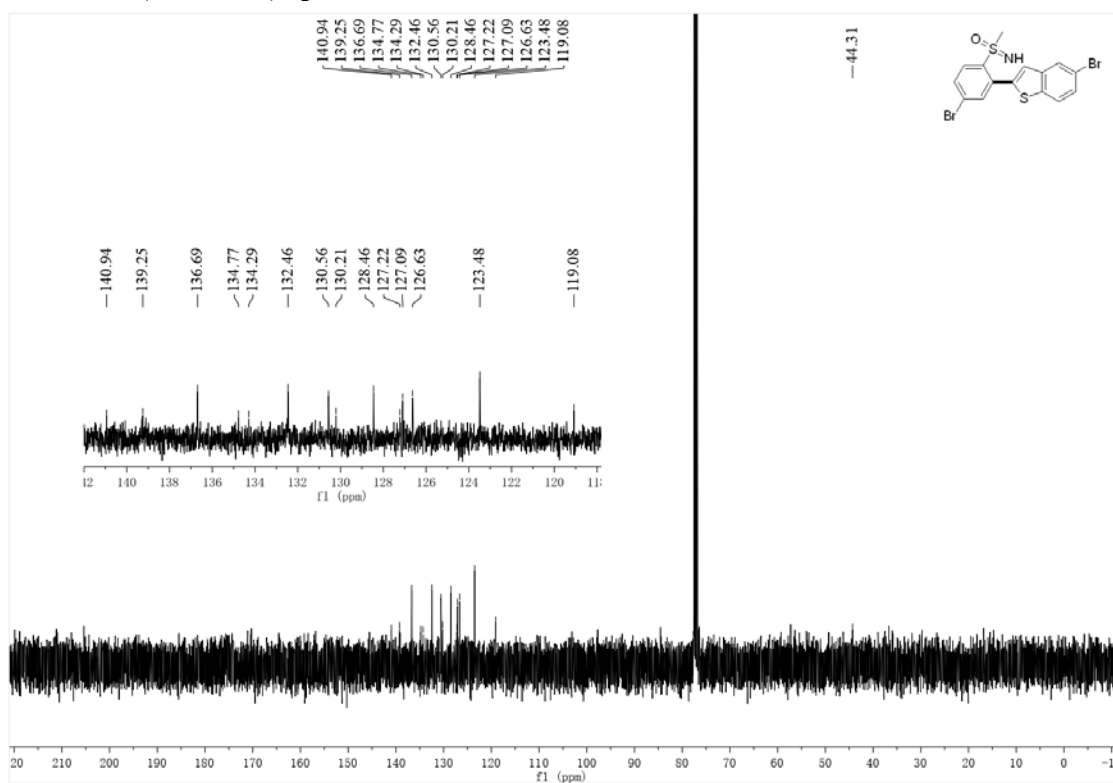

$^1\text{H}$  NMR (400 MHz) spectrum of **3e** in  $\text{CDCl}_3$

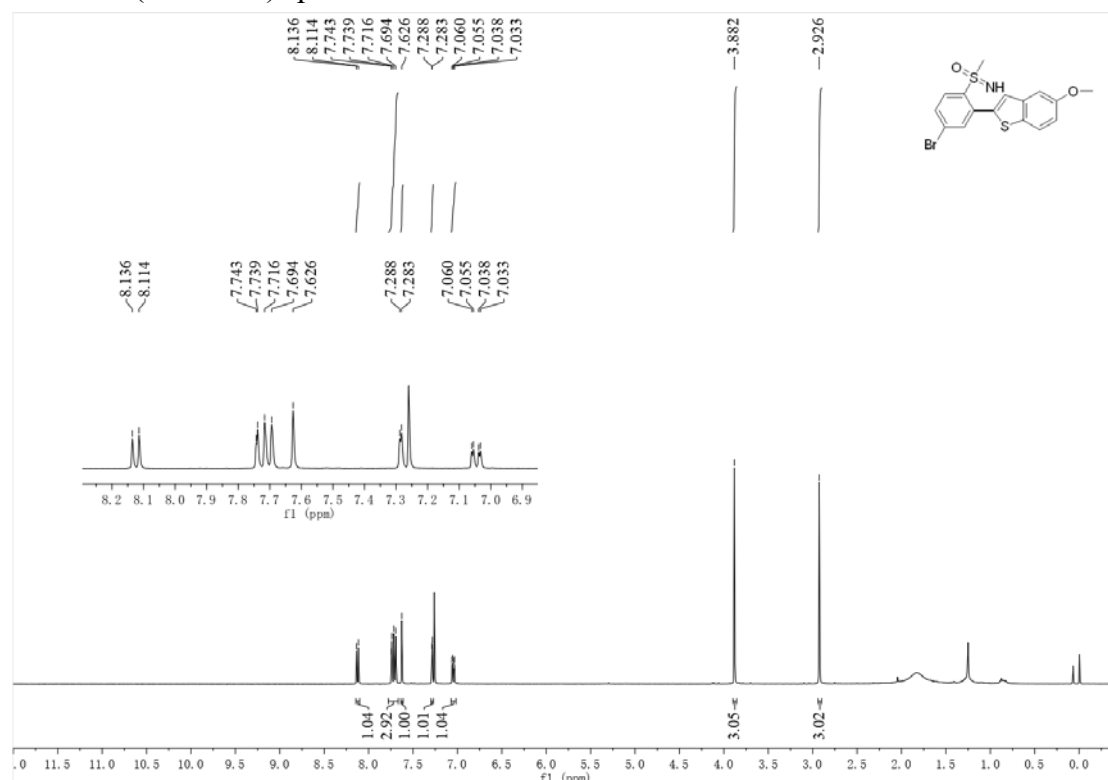

$^{13}\text{C}$  NMR (100 MHz) spectrum of **3e** in  $\text{CDCl}_3$

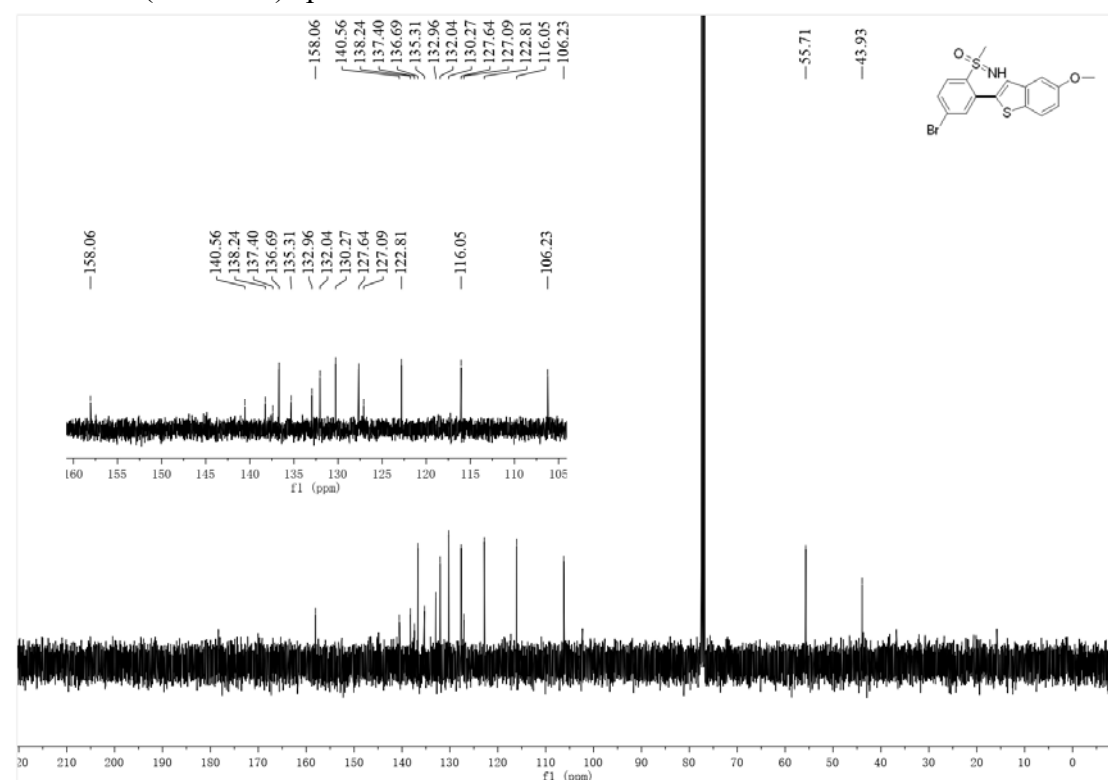

<sup>1</sup>H NMR (400 MHz) spectrum of **3f** in CDCl<sub>3</sub>

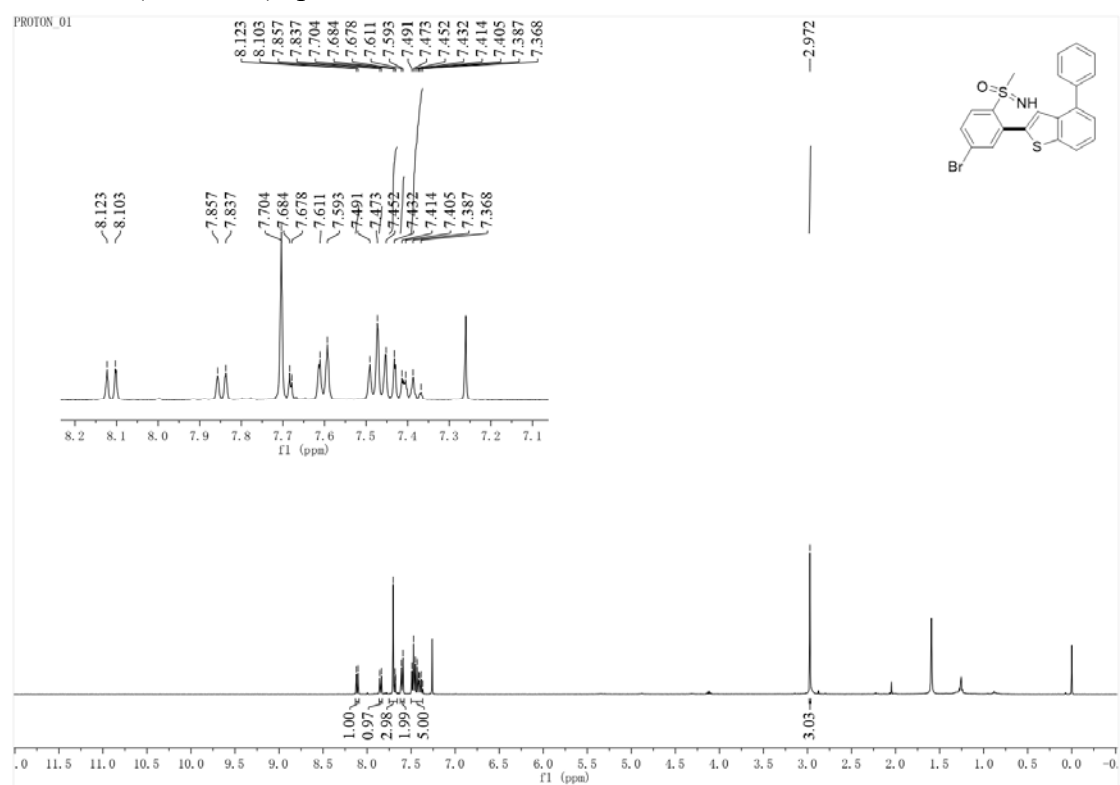

<sup>13</sup>C NMR (100 MHz) spectrum of **3f** in CDCl<sub>3</sub>

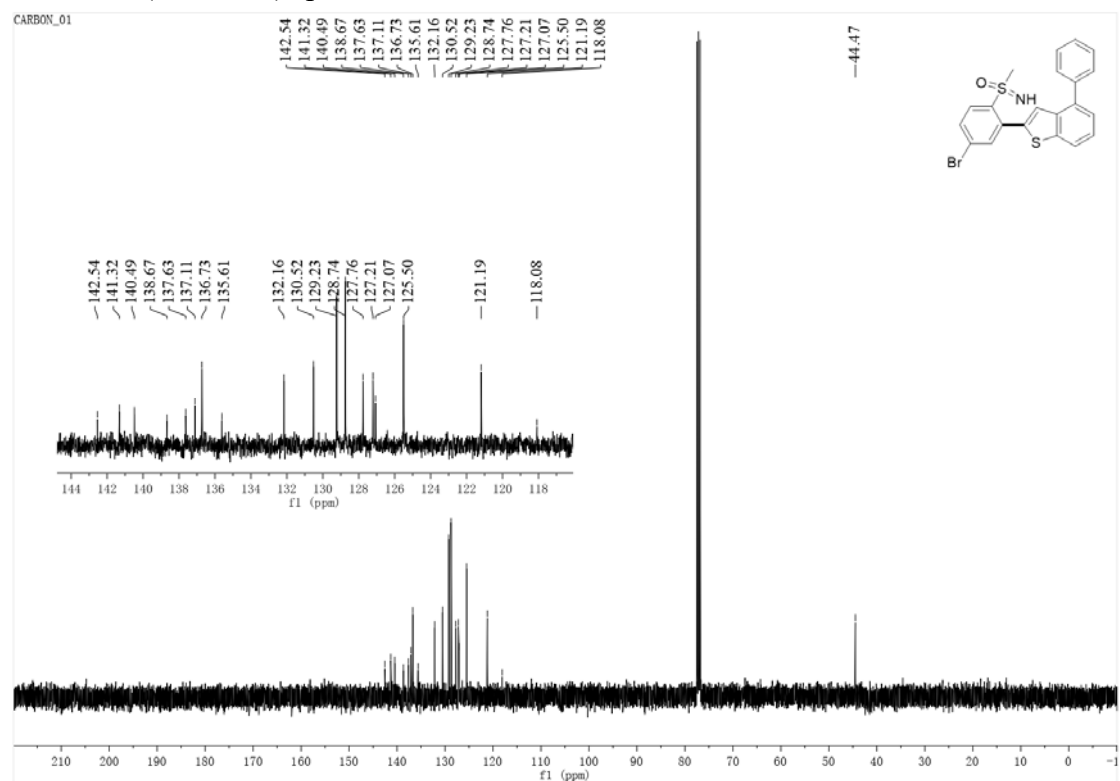



<sup>1</sup>H NMR (400 MHz) spectrum of **3h** in CDCl<sub>3</sub>

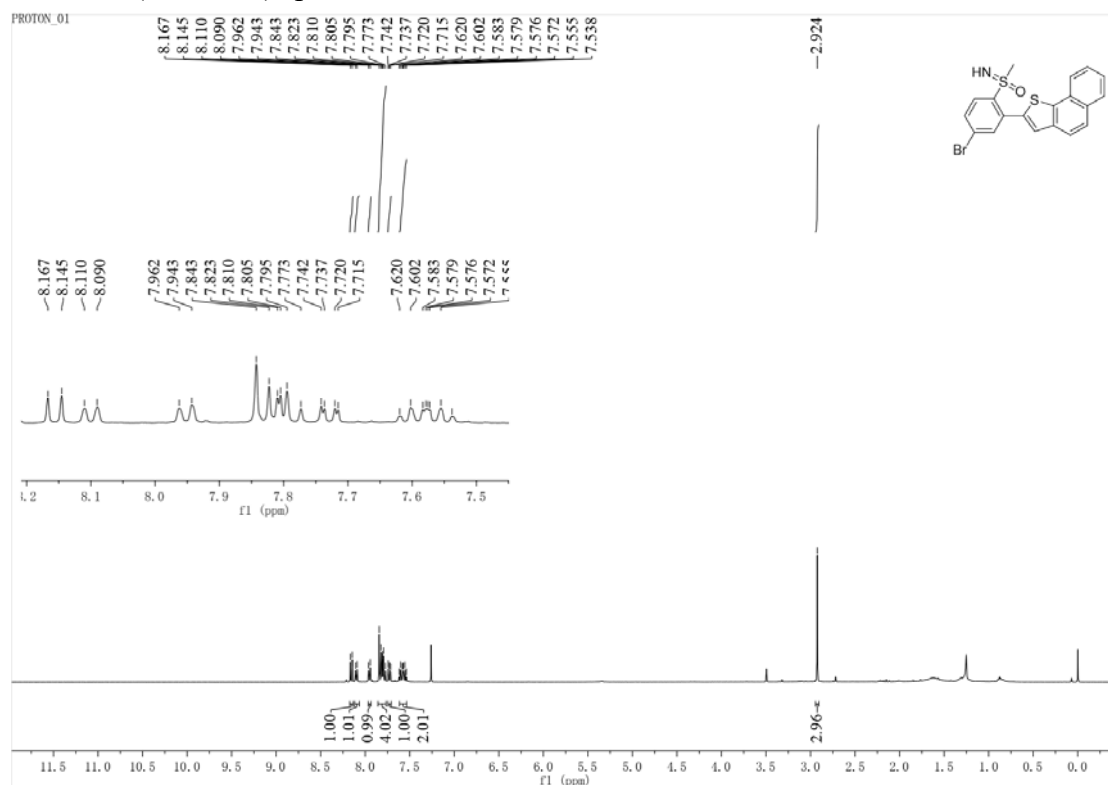

<sup>13</sup>C NMR (100 MHz) spectrum of **3h** in CDCl<sub>3</sub>

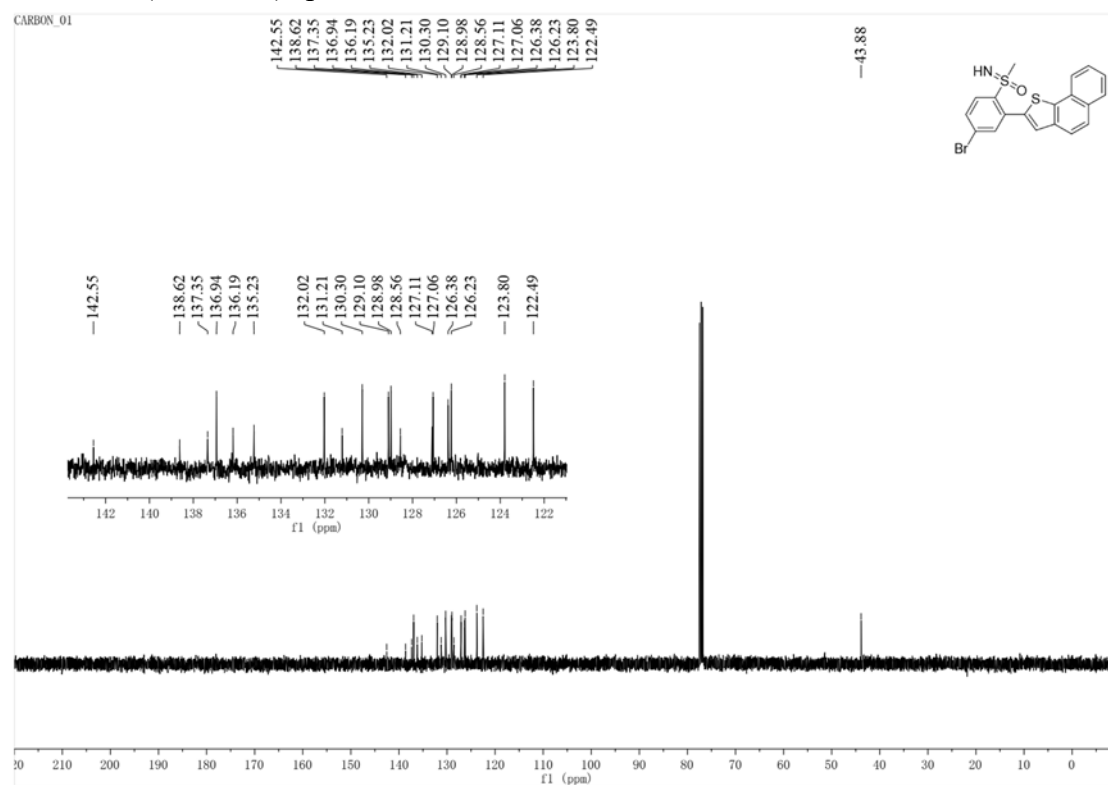

<sup>1</sup>H NMR (400 MHz) spectrum of **3i** in CDCl<sub>3</sub>

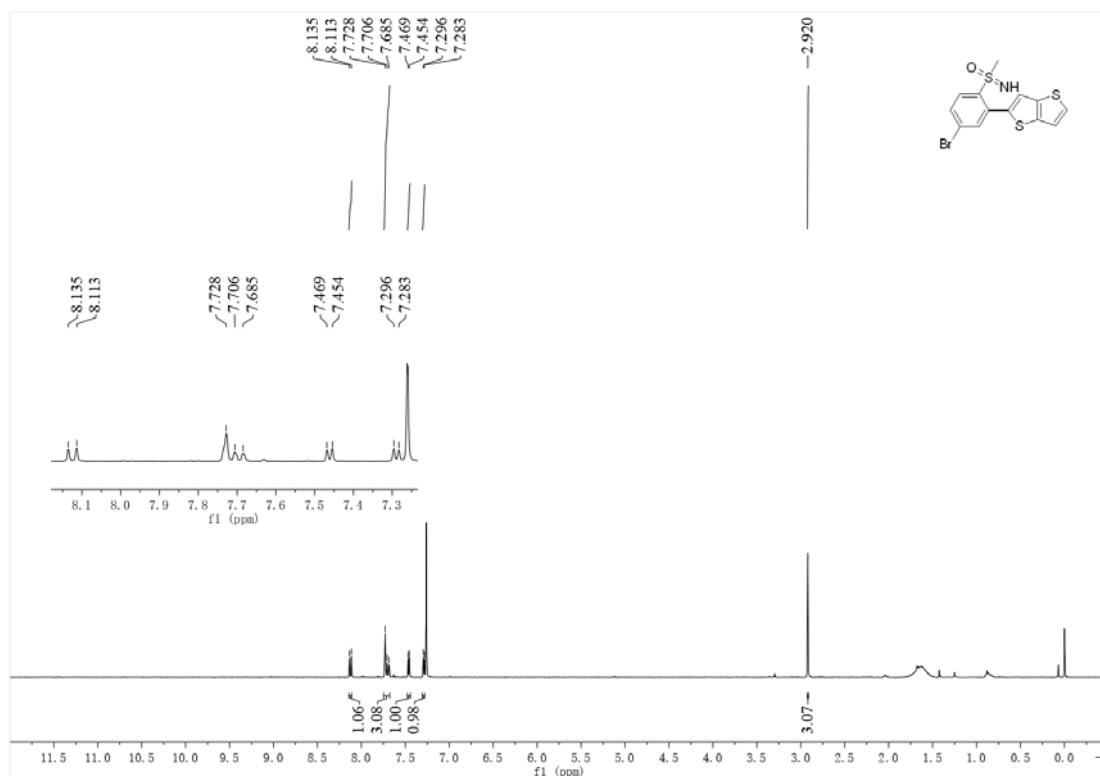

<sup>13</sup>C NMR (100 MHz) spectrum of **3i** in CDCl<sub>3</sub>

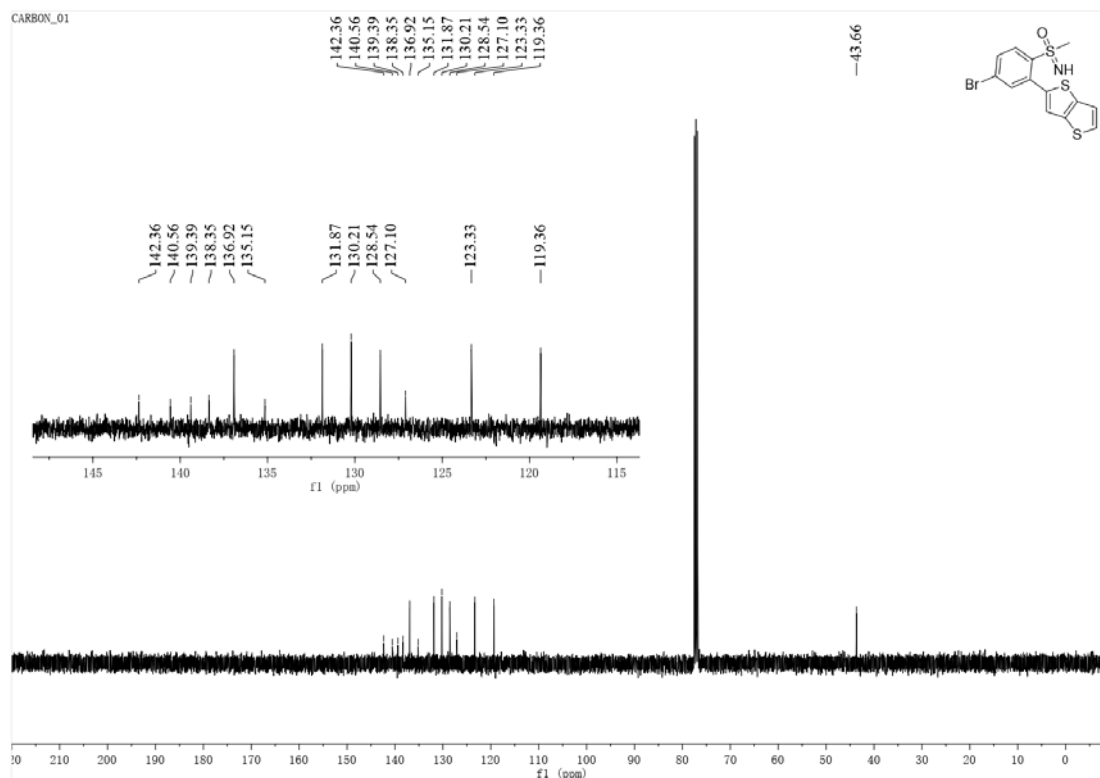



<sup>1</sup>H NMR (400 MHz) spectrum of **3j** in CDCl<sub>3</sub>

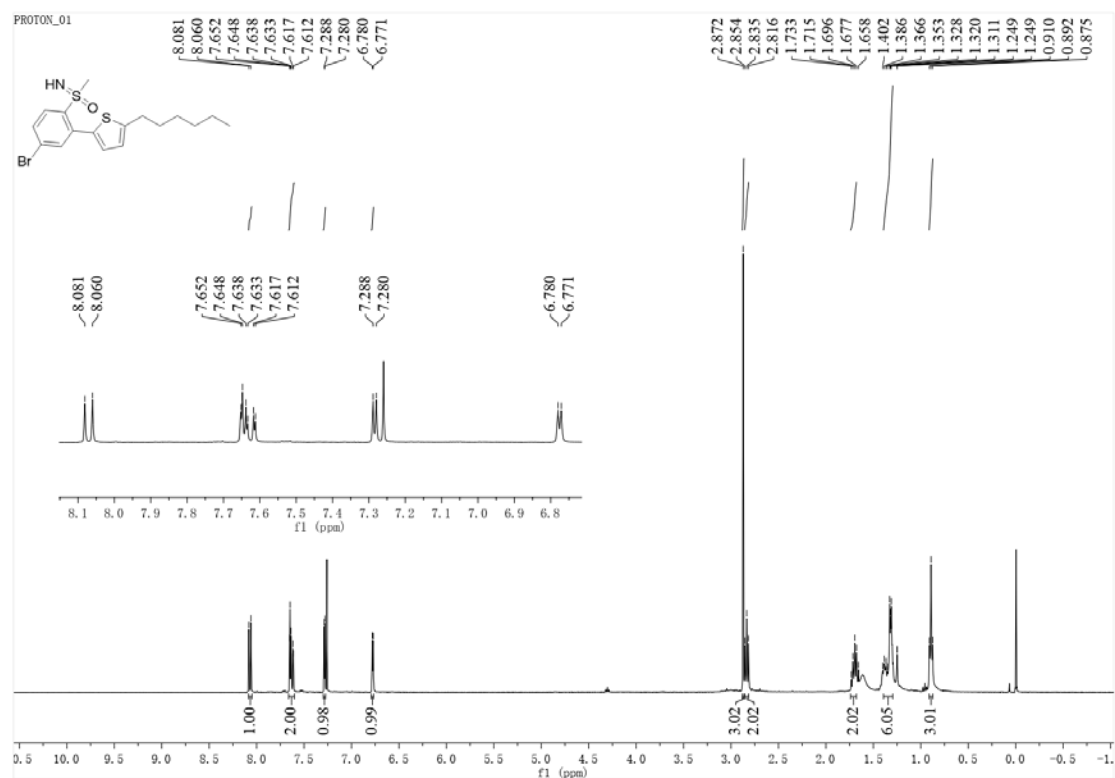

<sup>13</sup>C NMR (100 MHz) spectrum of **3j** in CDCl<sub>3</sub>

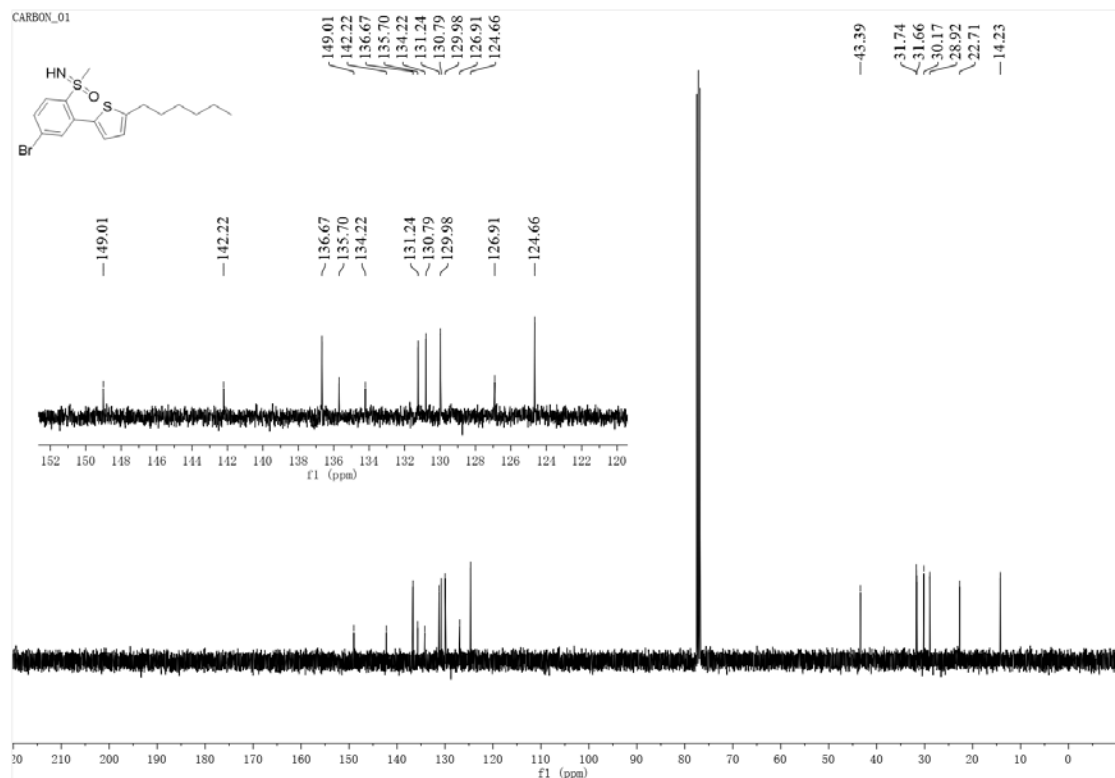

$^1\text{H}$  NMR (400 MHz) spectrum of **3k** in  $\text{CDCl}_3$

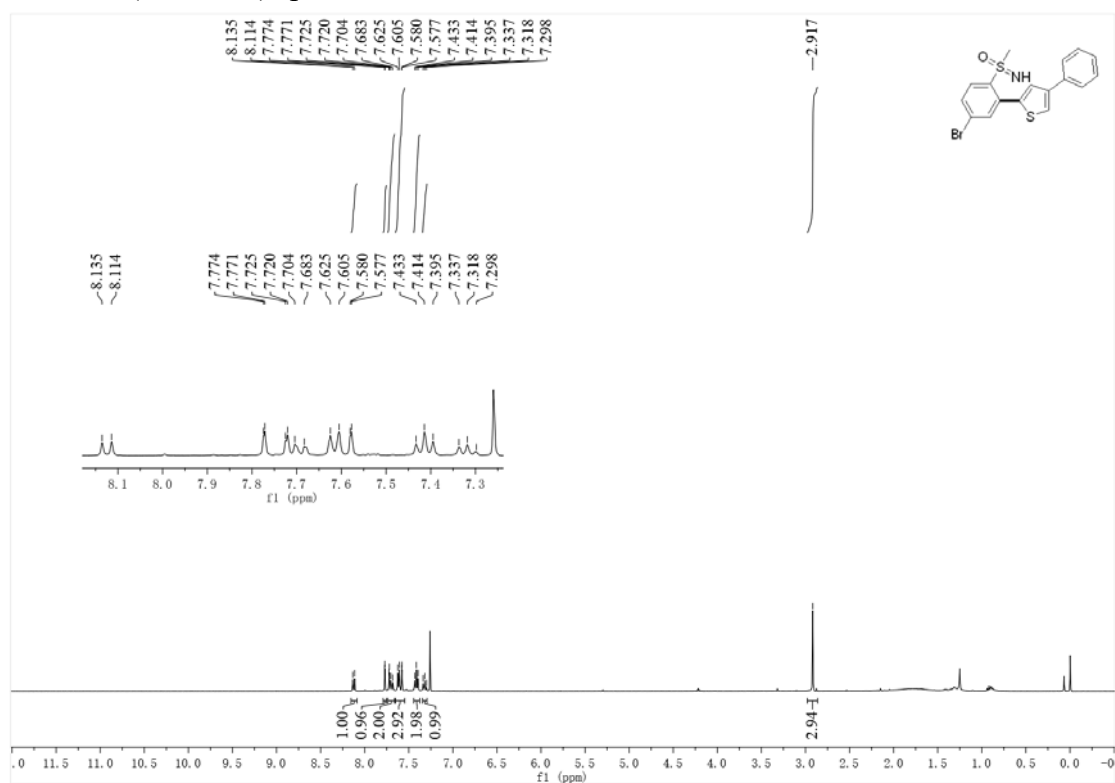

$^{13}\text{C}$  NMR (100 MHz) spectrum of **3k** in  $\text{CDCl}_3$

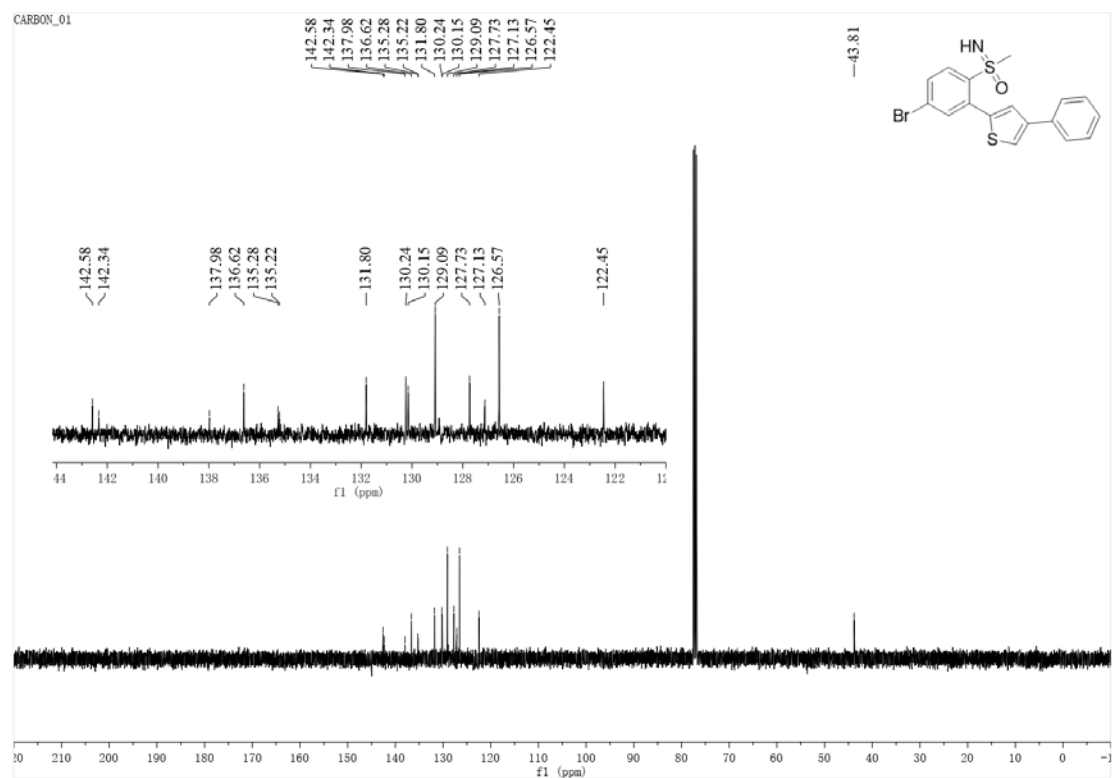

<sup>1</sup>H NMR (400 MHz) spectrum of **31** in CDCl<sub>3</sub>

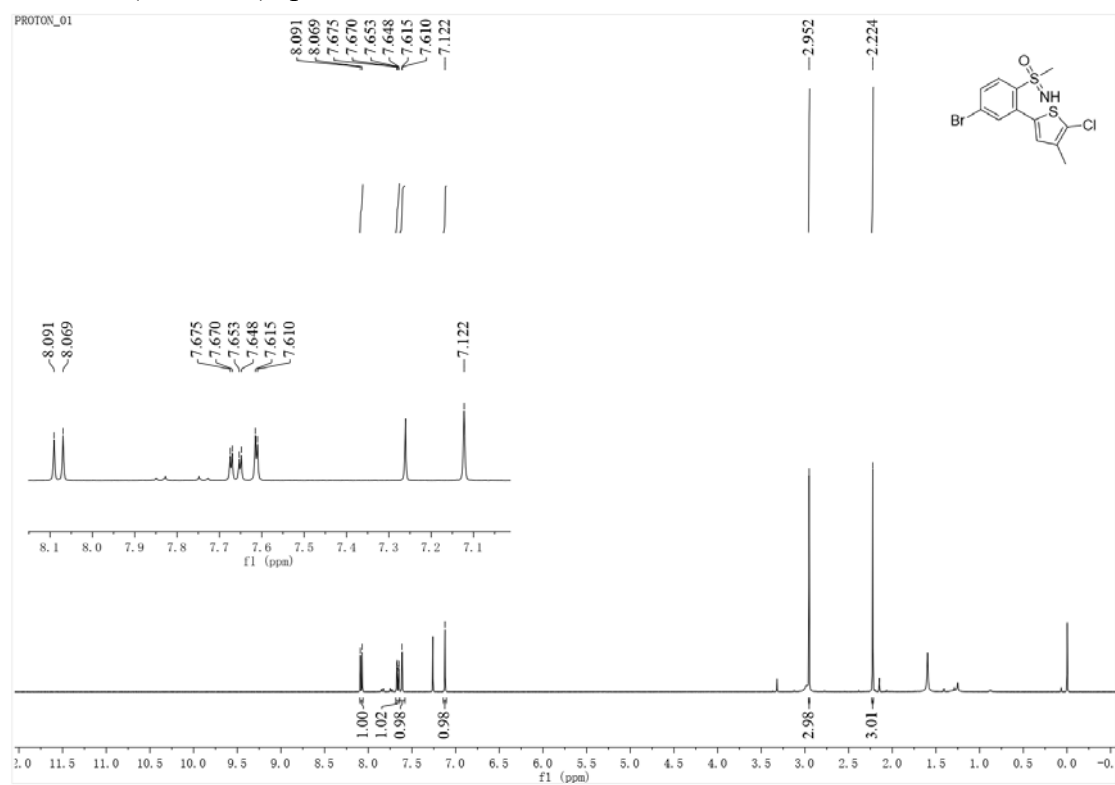

<sup>13</sup>C NMR (100 MHz) spectrum of **31** in CDCl<sub>3</sub>

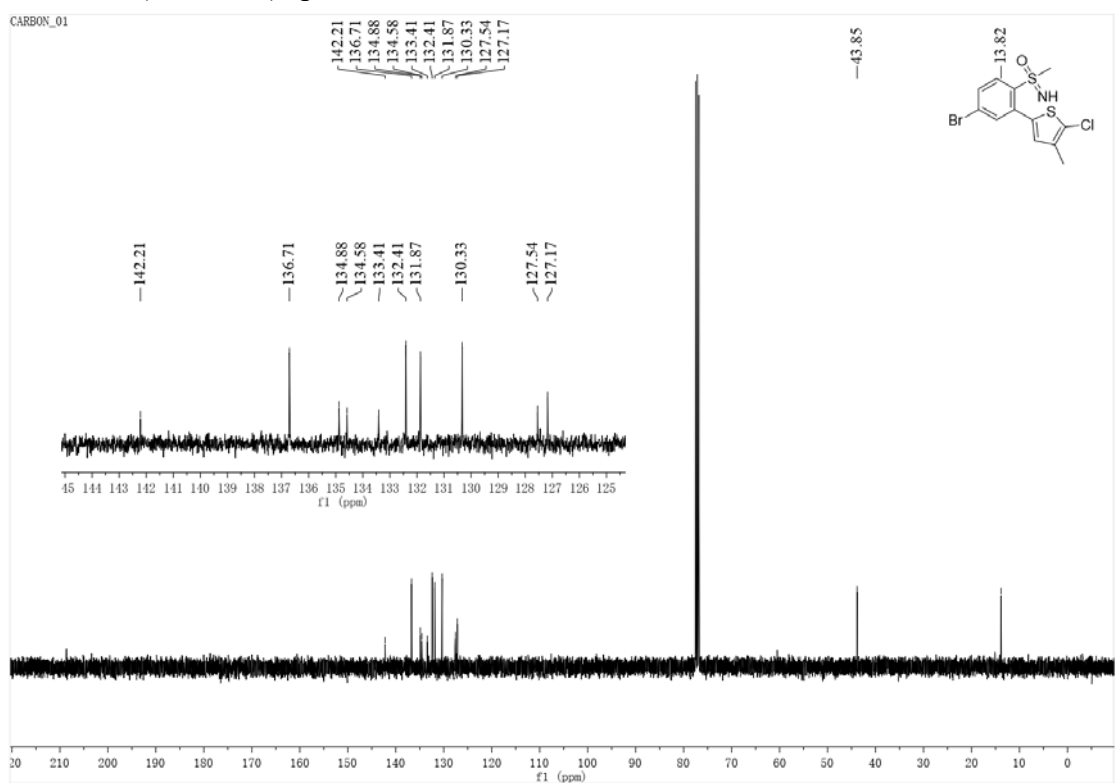

$^1\text{H}$  NMR (400 MHz) spectrum of **3m** in  $\text{CDCl}_3$

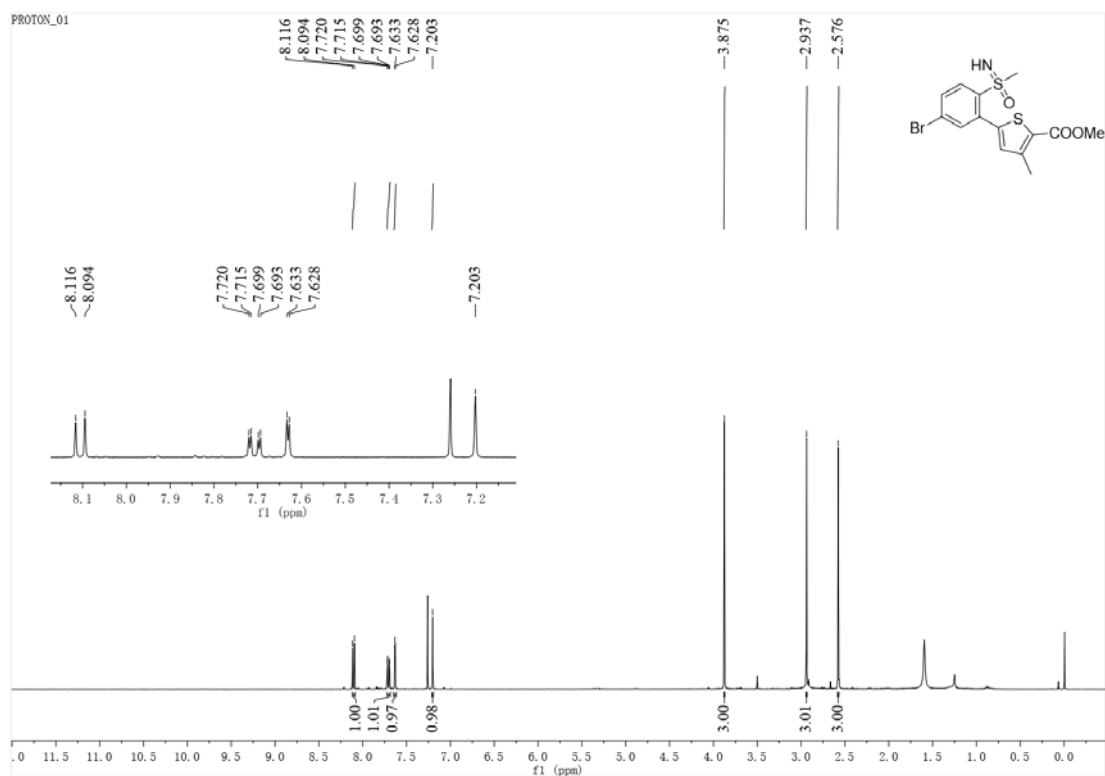

$^{13}\text{C}$  NMR (100 MHz) spectrum of **3m** in  $\text{CDCl}_3$

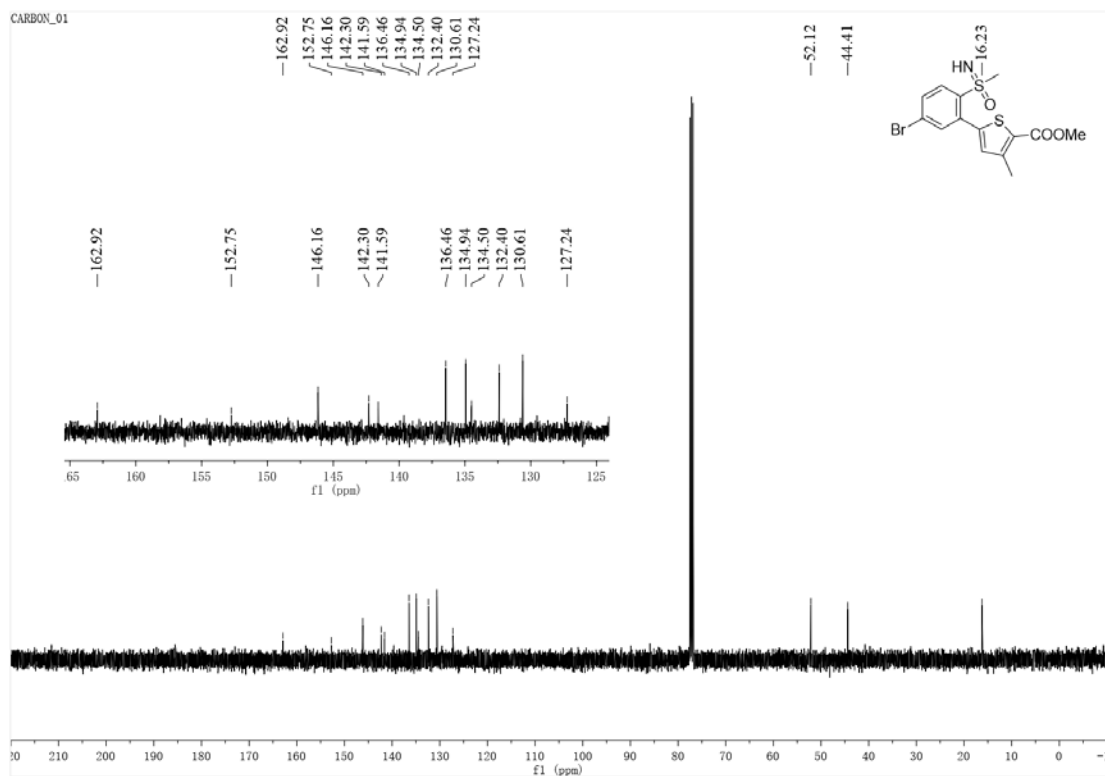

<sup>1</sup>H NMR (400 MHz) spectrum of **3n** in CDCl<sub>3</sub>

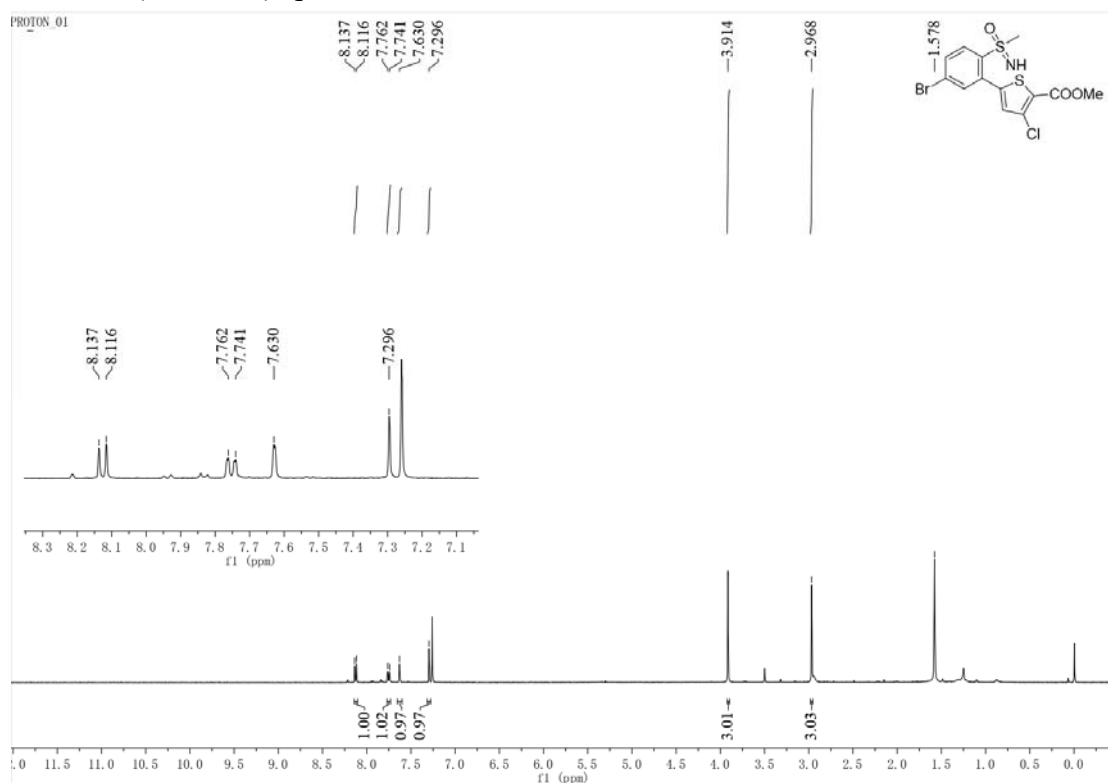

<sup>13</sup>C NMR (100 MHz) spectrum of **3n** in CDCl<sub>3</sub>

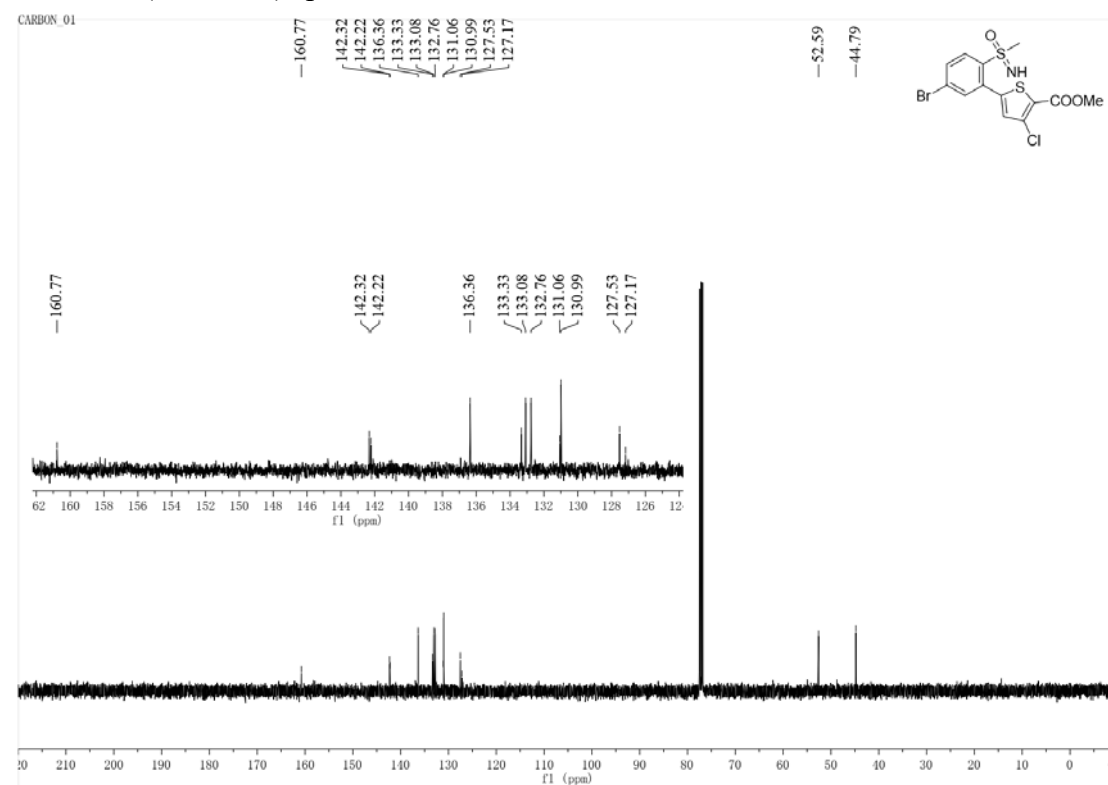

<sup>1</sup>H NMR (400 MHz) spectrum of **30** in CDCl<sub>3</sub>

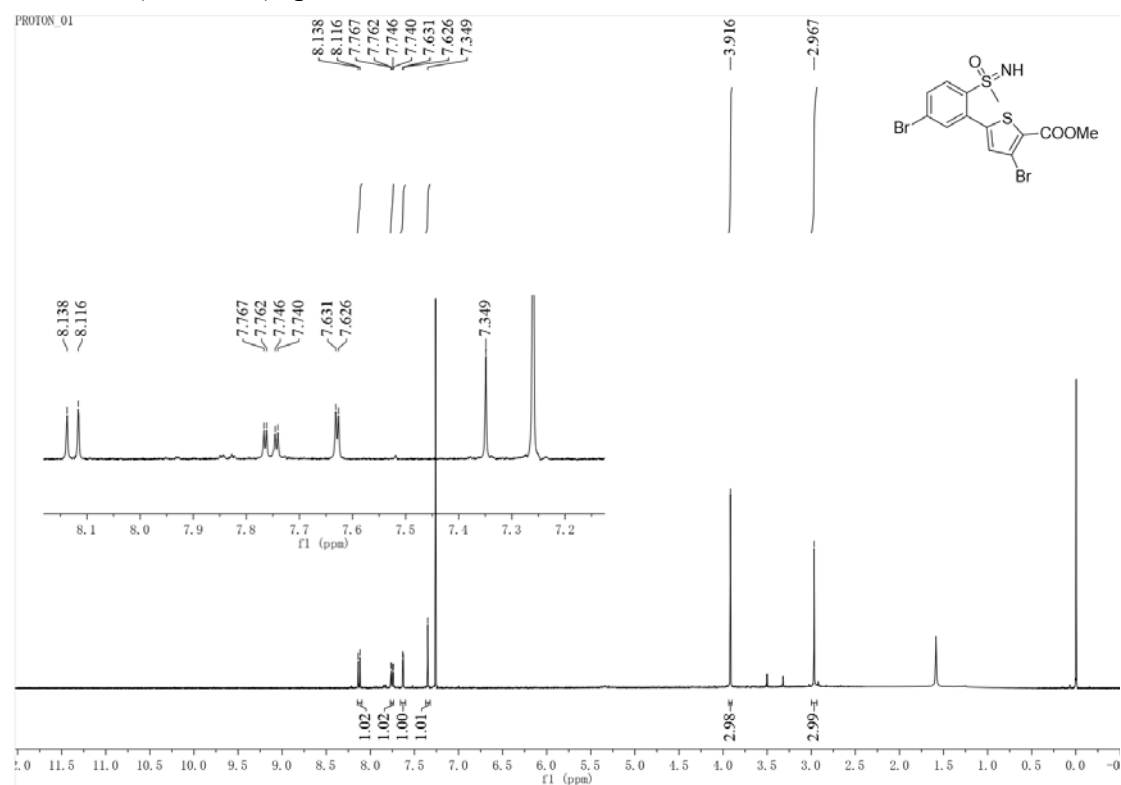

<sup>13</sup>C NMR (100 MHz) spectrum of **30** in CDCl<sub>3</sub>

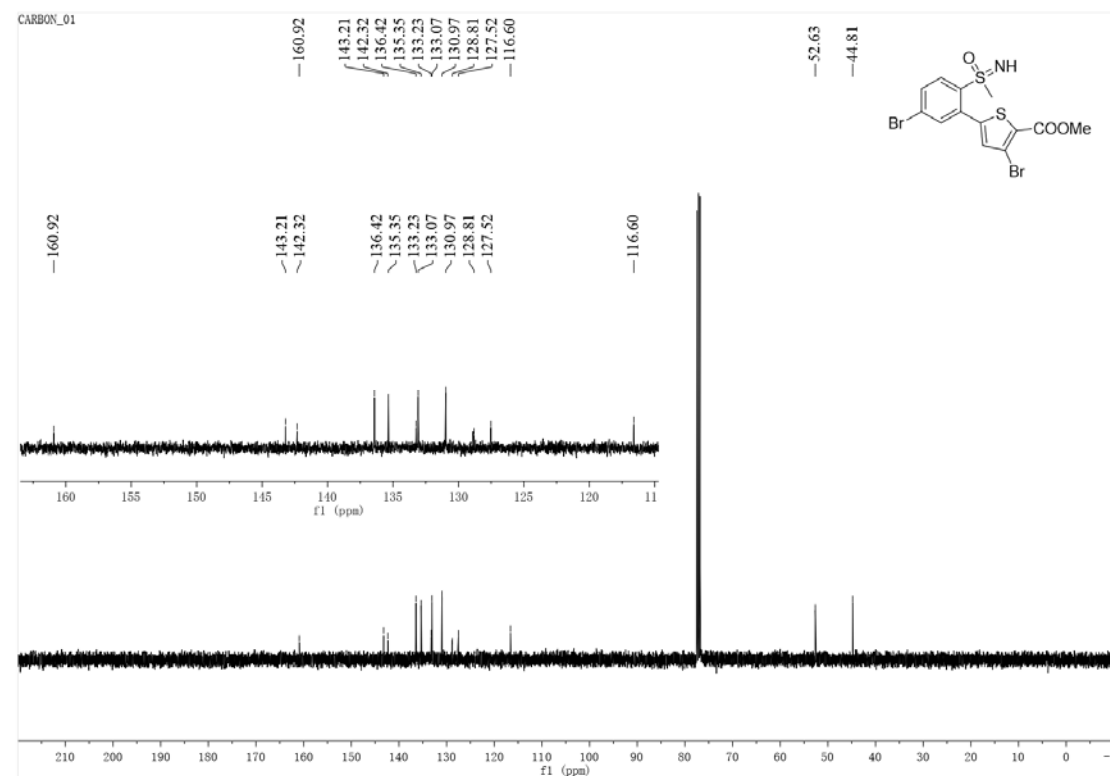

<sup>1</sup>H NMR (400 MHz) spectrum of **3p** in CDCl<sub>3</sub>

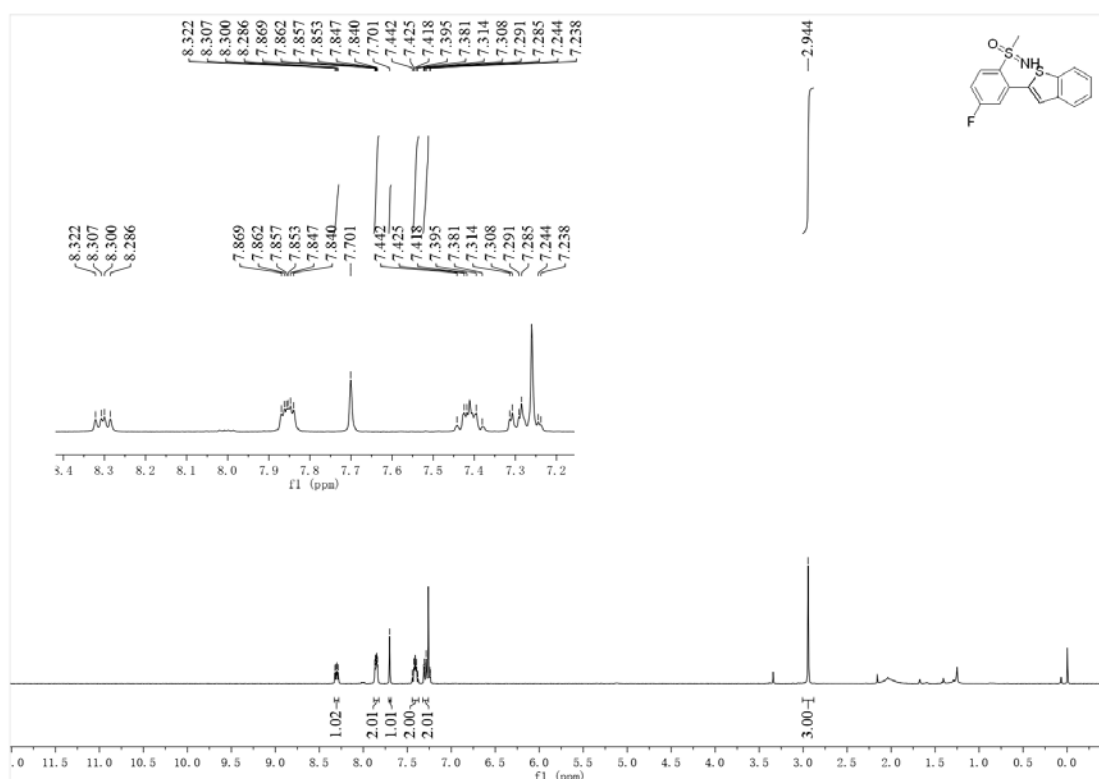

<sup>13</sup>C NMR (100 MHz) spectrum of **3p** in CDCl<sub>3</sub>

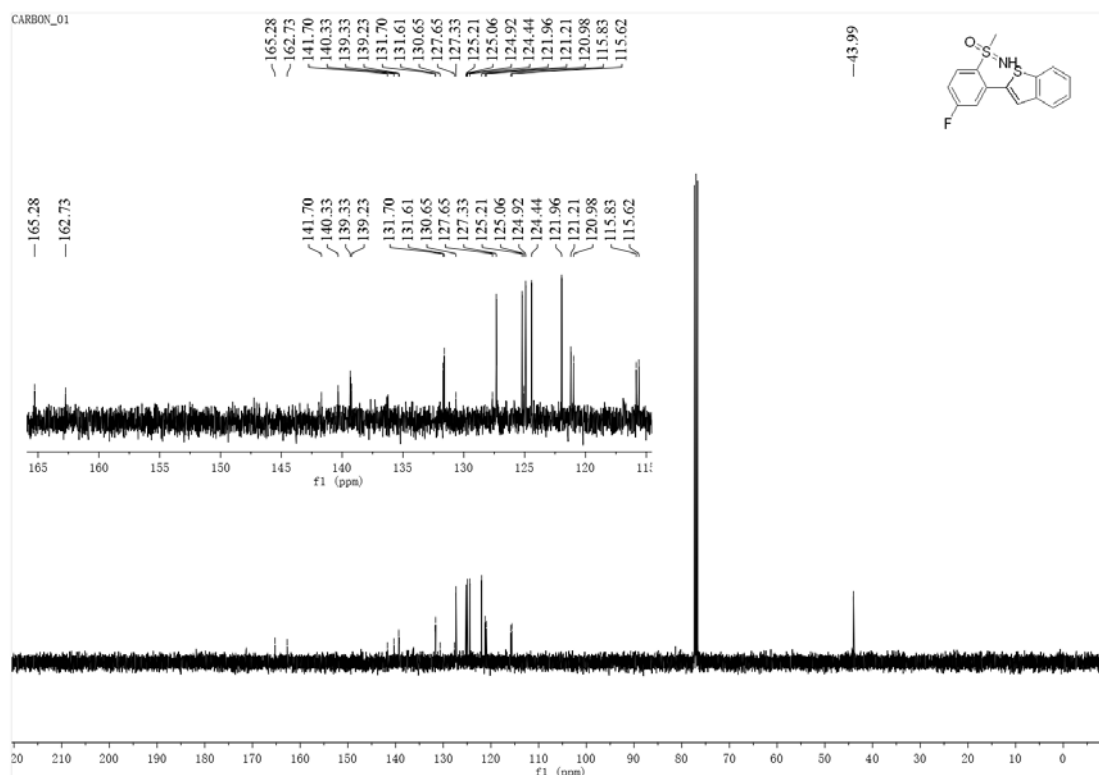

<sup>1</sup>H NMR (400 MHz) spectrum of **3q** in CDCl<sub>3</sub>

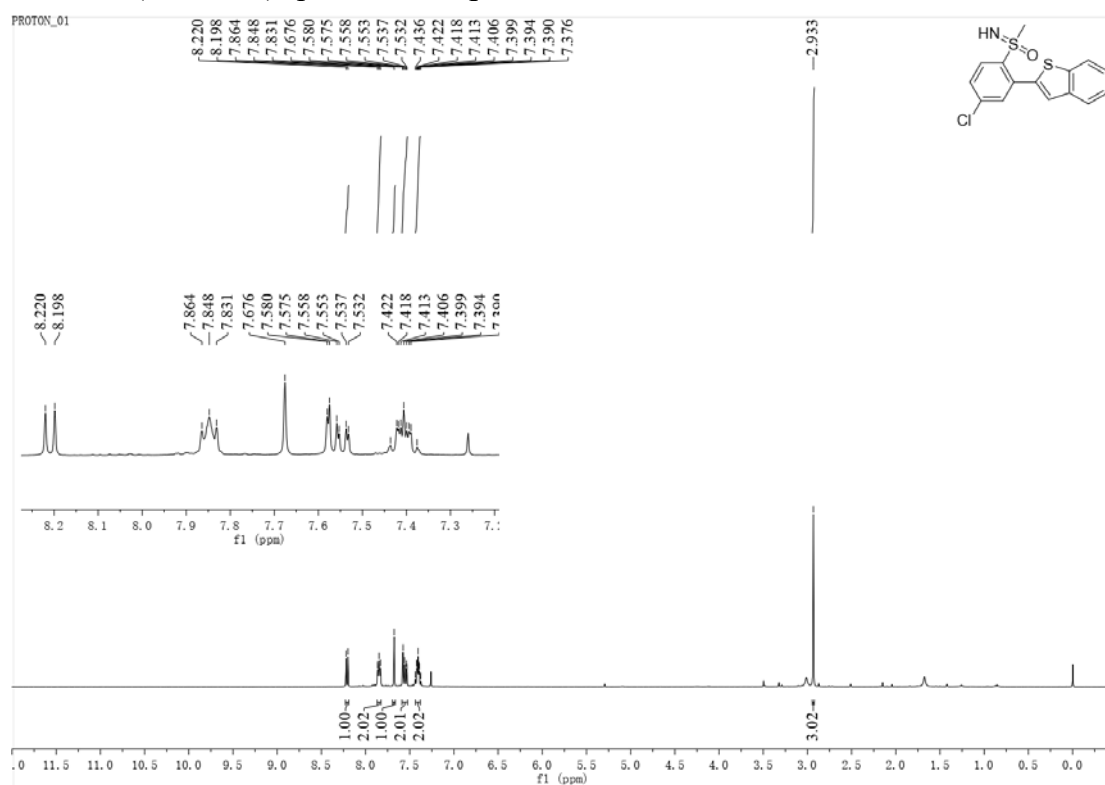

<sup>13</sup>C NMR (100 MHz) spectrum of **3q** in CDCl<sub>3</sub>

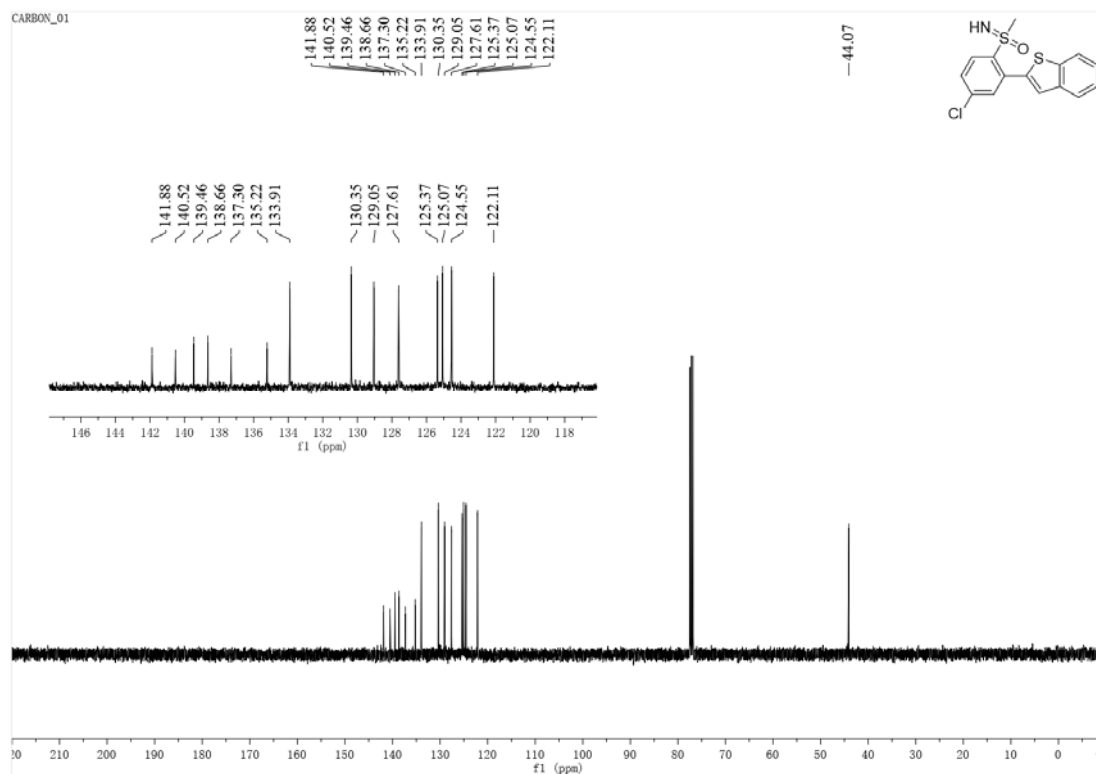



$^1\text{H}$  NMR (400 MHz) spectrum of **3r** in  $\text{CDCl}_3$

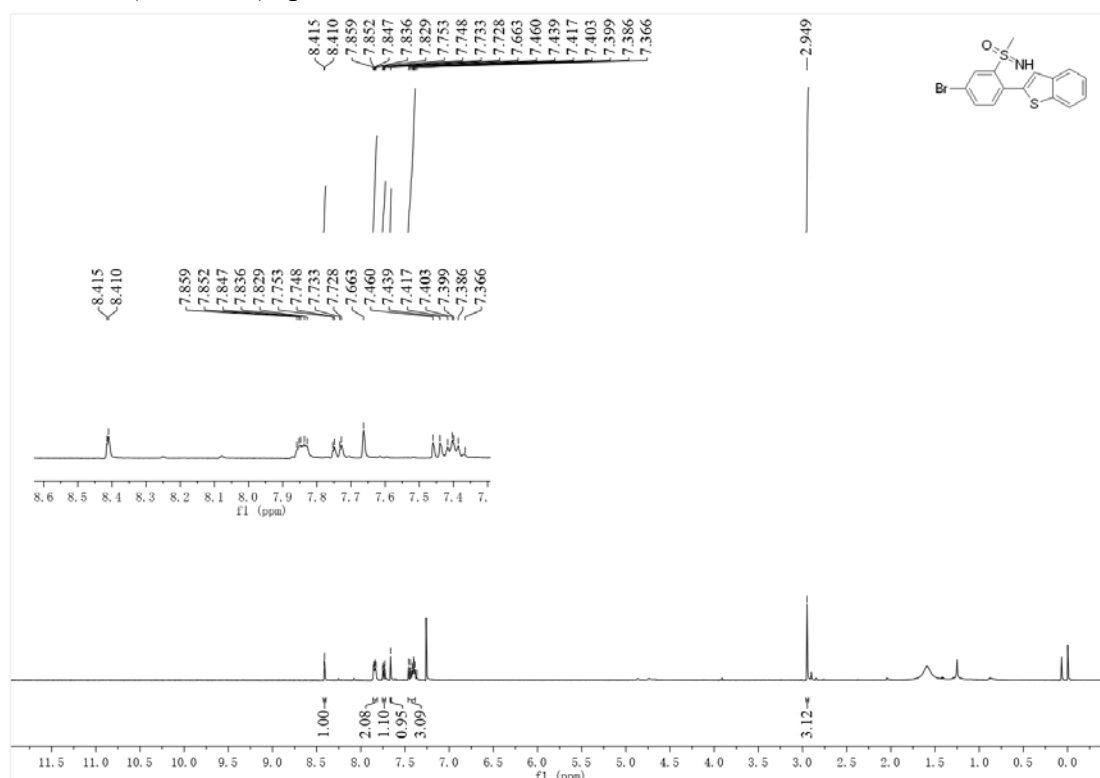

$^{13}\text{C}$  NMR (100 MHz) spectrum of **3r** in  $\text{CDCl}_3$

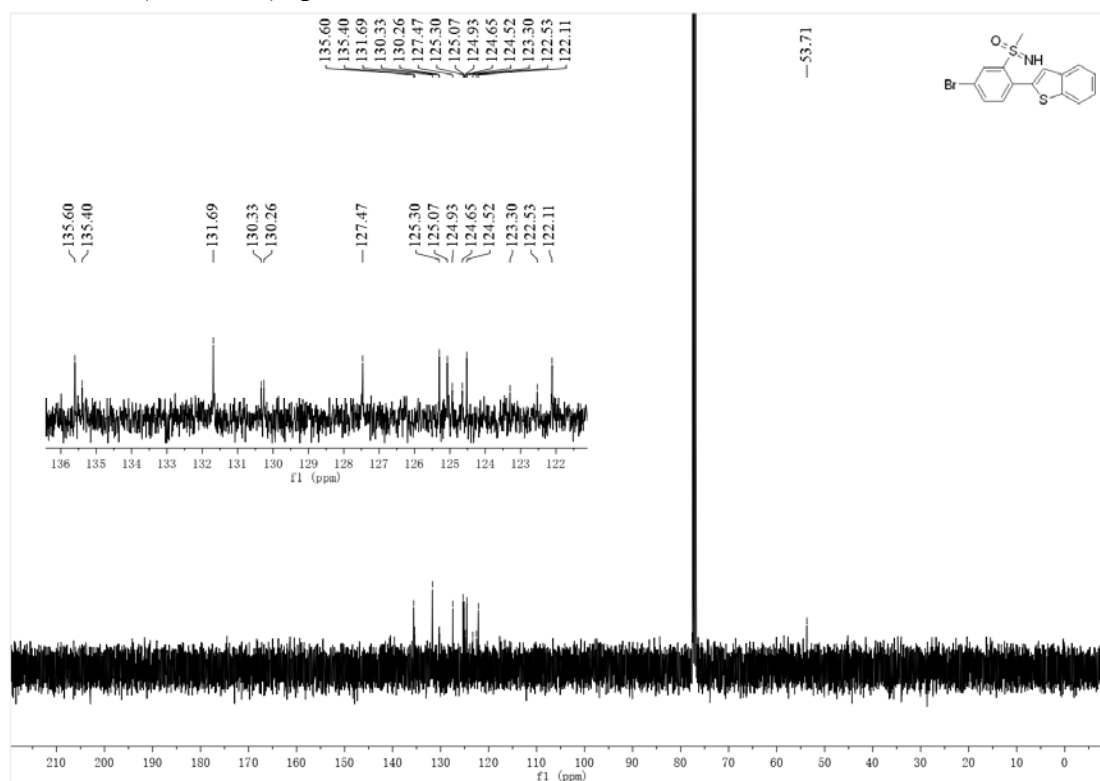

<sup>1</sup>H NMR (400 MHz) spectrum of **3s** in CDCl<sub>3</sub>

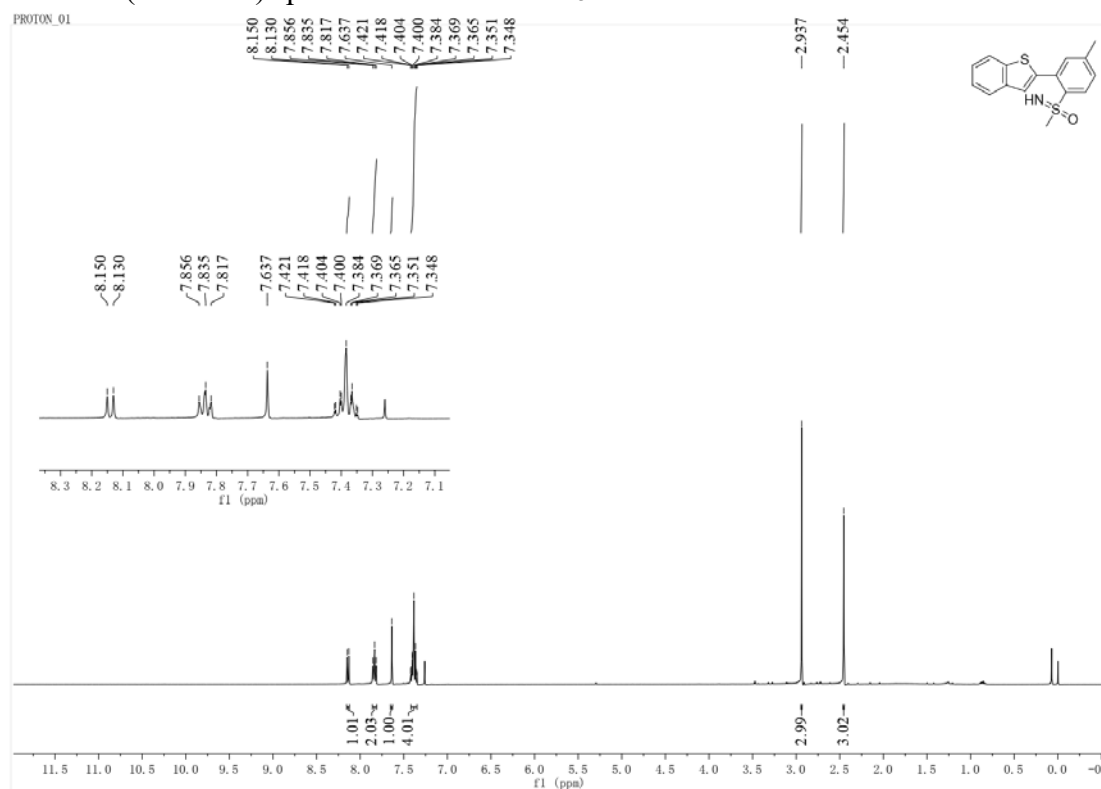

<sup>13</sup>C NMR (100 MHz) spectrum of **3s** in CDCl<sub>3</sub>

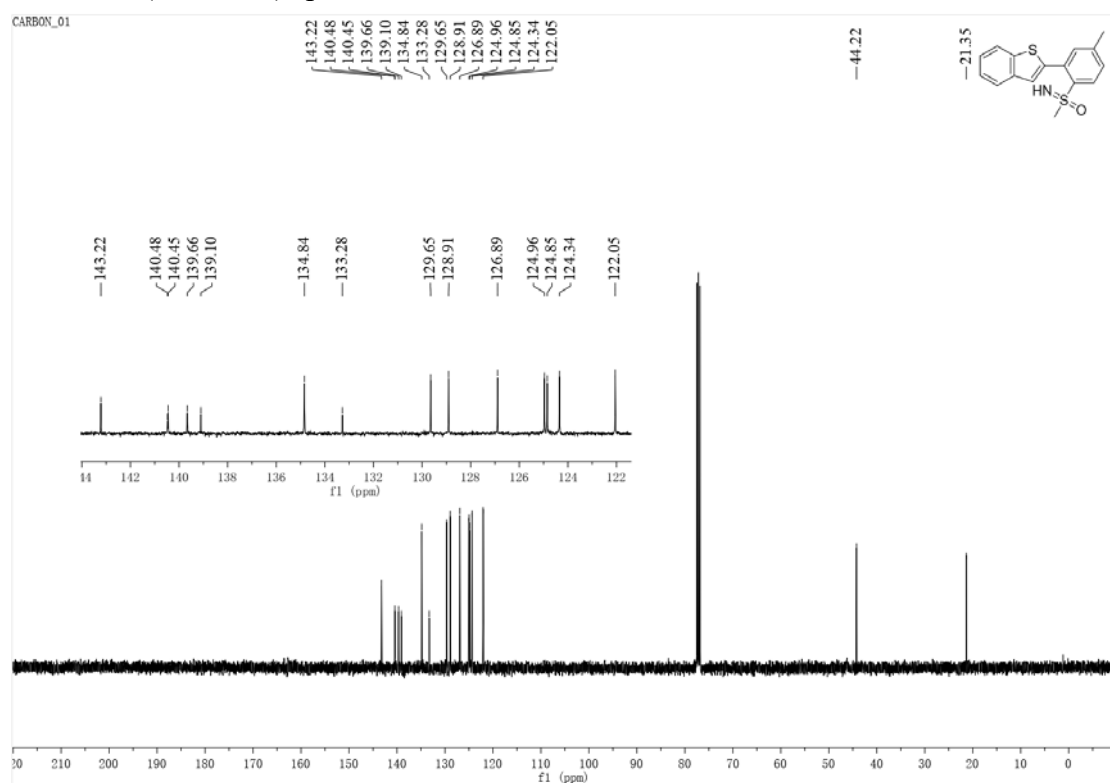

<sup>1</sup>H NMR (400 MHz) spectrum of **3t** in CDCl<sub>3</sub>

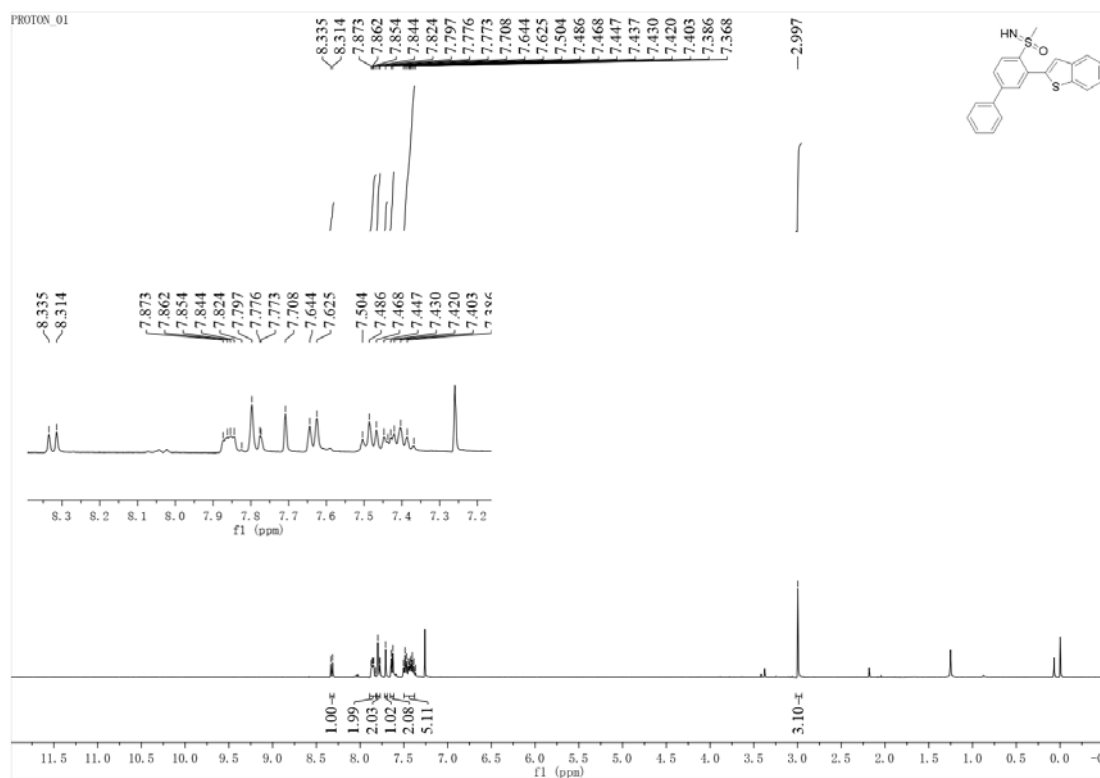

<sup>13</sup>C NMR (100 MHz) spectrum of **3t** in CDCl<sub>3</sub>

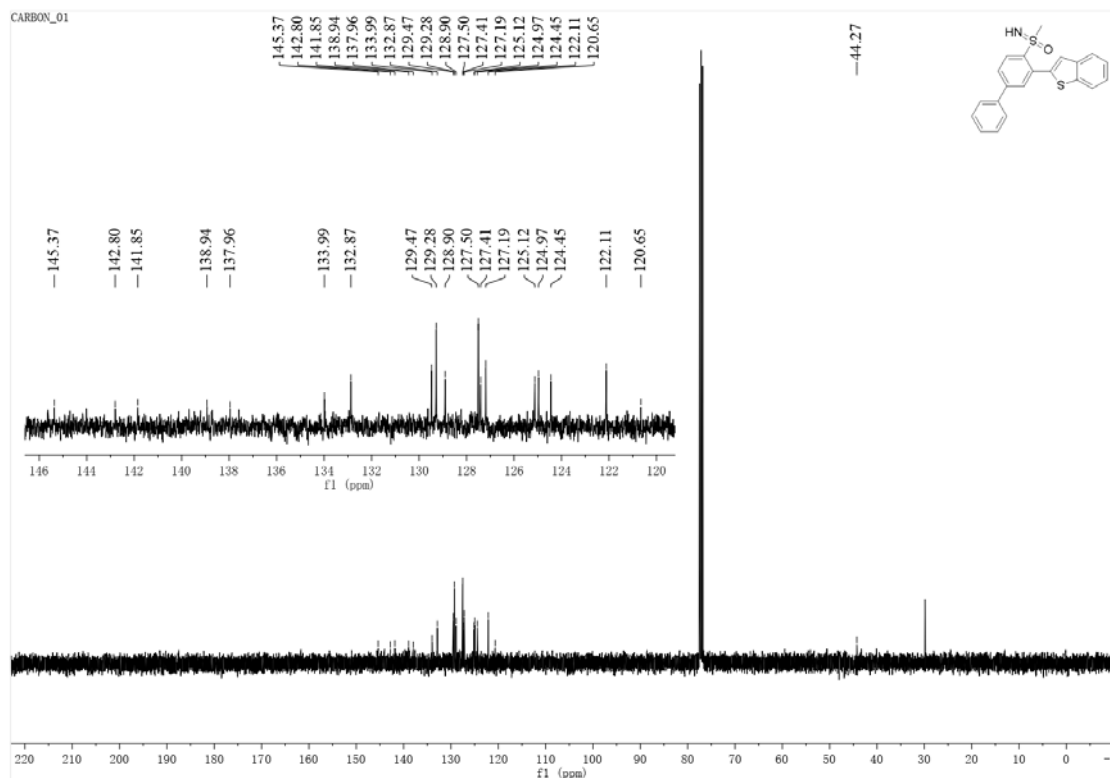



<sup>1</sup>H NMR (400 MHz) spectrum of **3v** in CDCl<sub>3</sub>

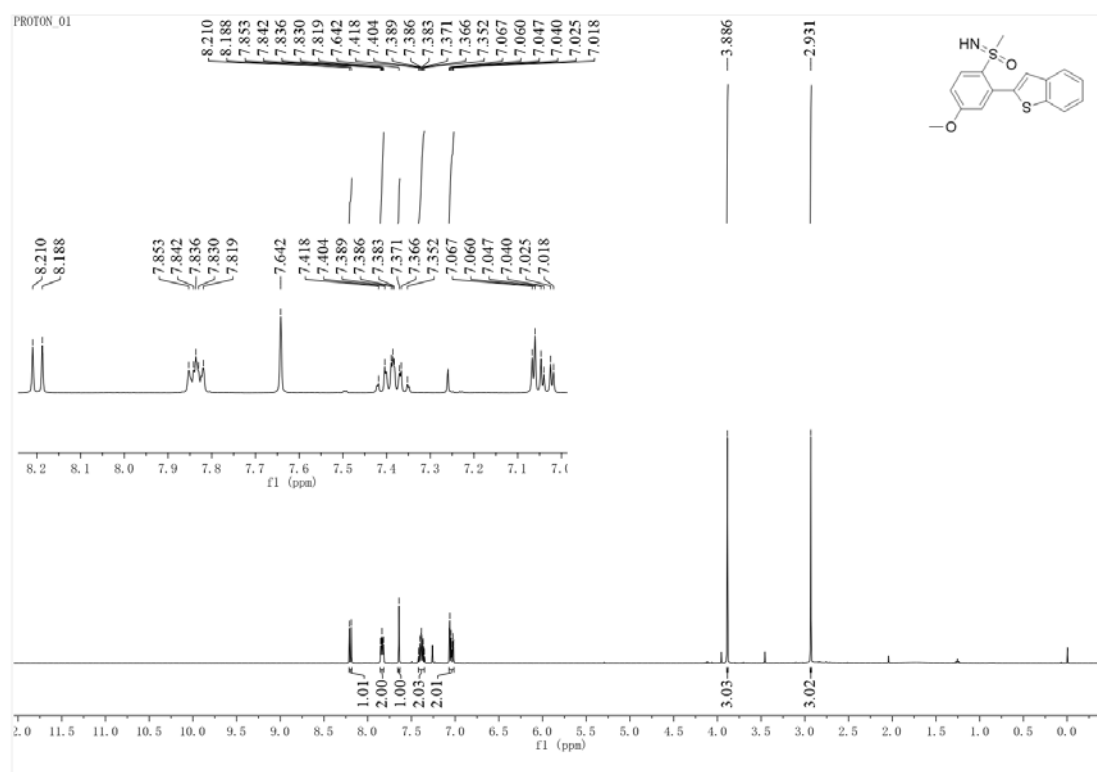

<sup>13</sup>C NMR (100 MHz) spectrum of **3v** in CDCl<sub>3</sub>

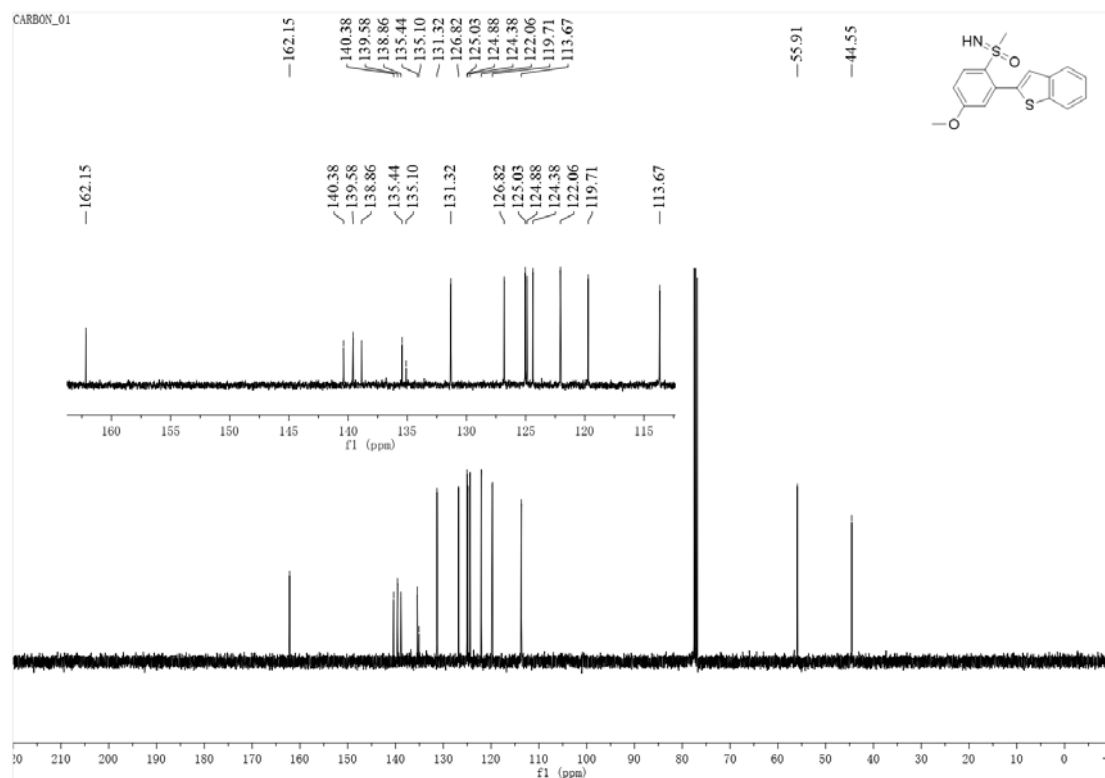

$^1\text{H}$  NMR (400 MHz) spectrum of  $[\text{D}_4]\text{-1a}$  in  $\text{CDCl}_3$

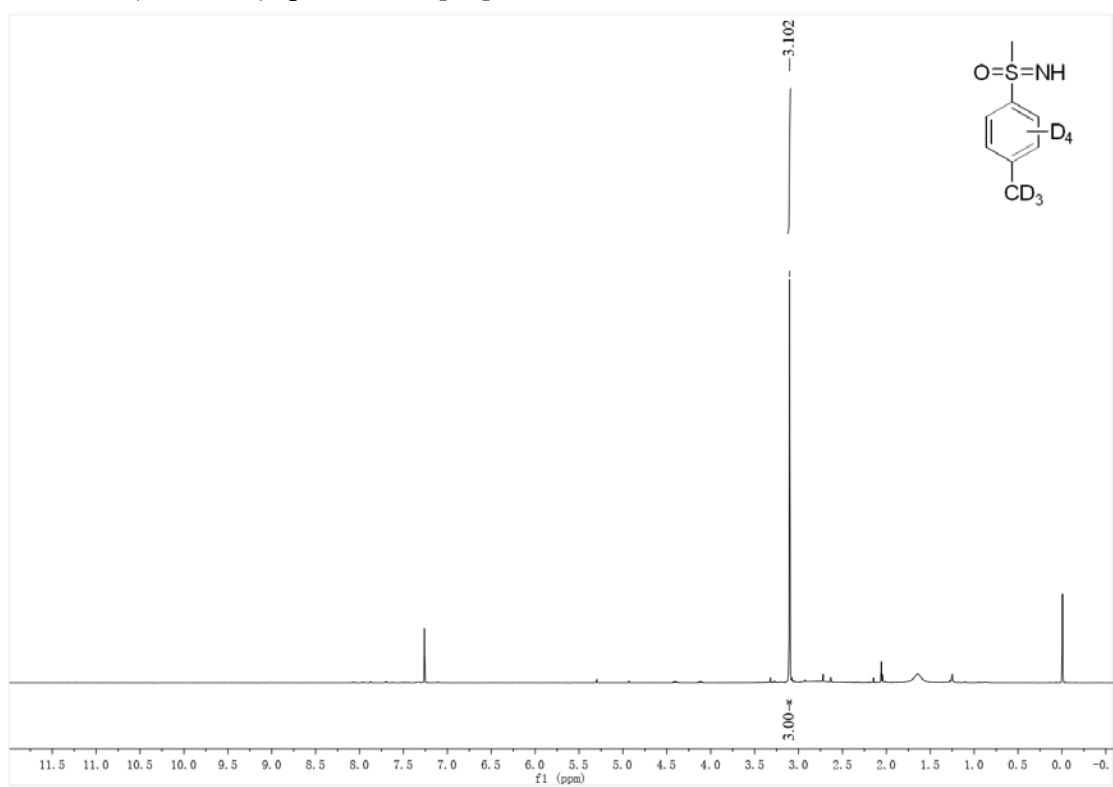

$^{13}\text{C}$  NMR (100 MHz) spectrum of  $[\text{D}_4]\text{-1a}$  in  $\text{CDCl}_3$

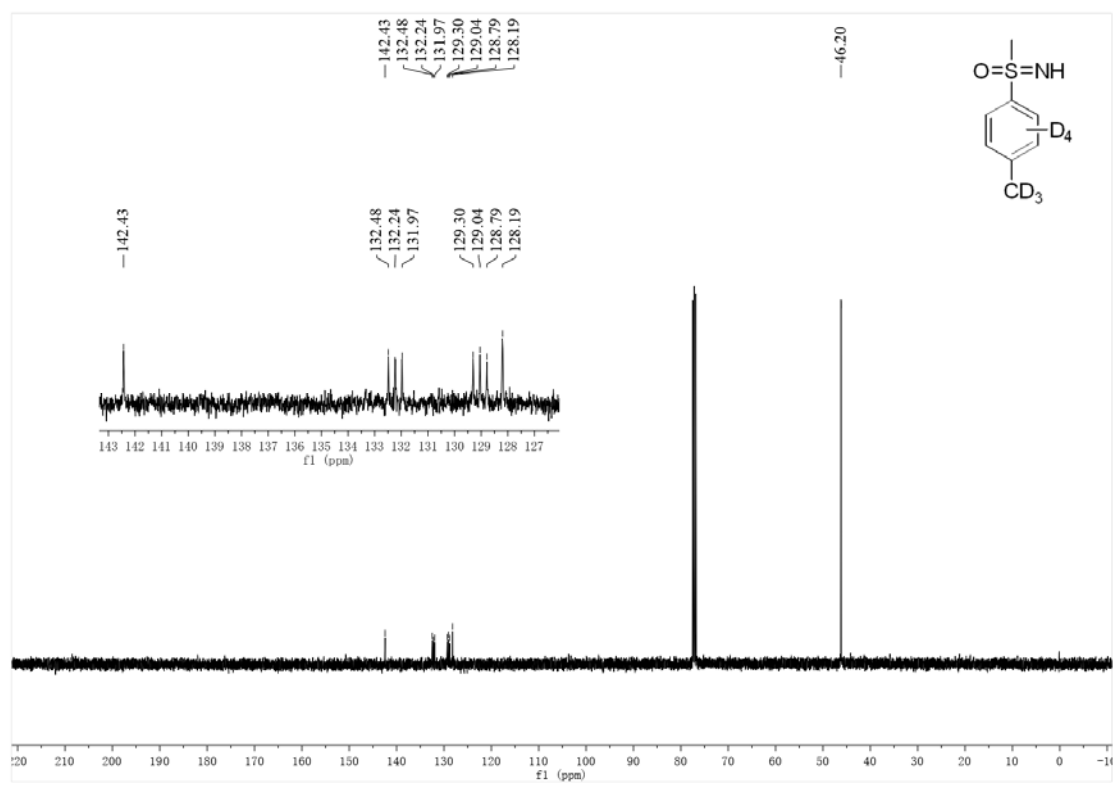

$^1\text{H}$  NMR (400 MHz) spectrum of **4a** in  $\text{CDCl}_3$

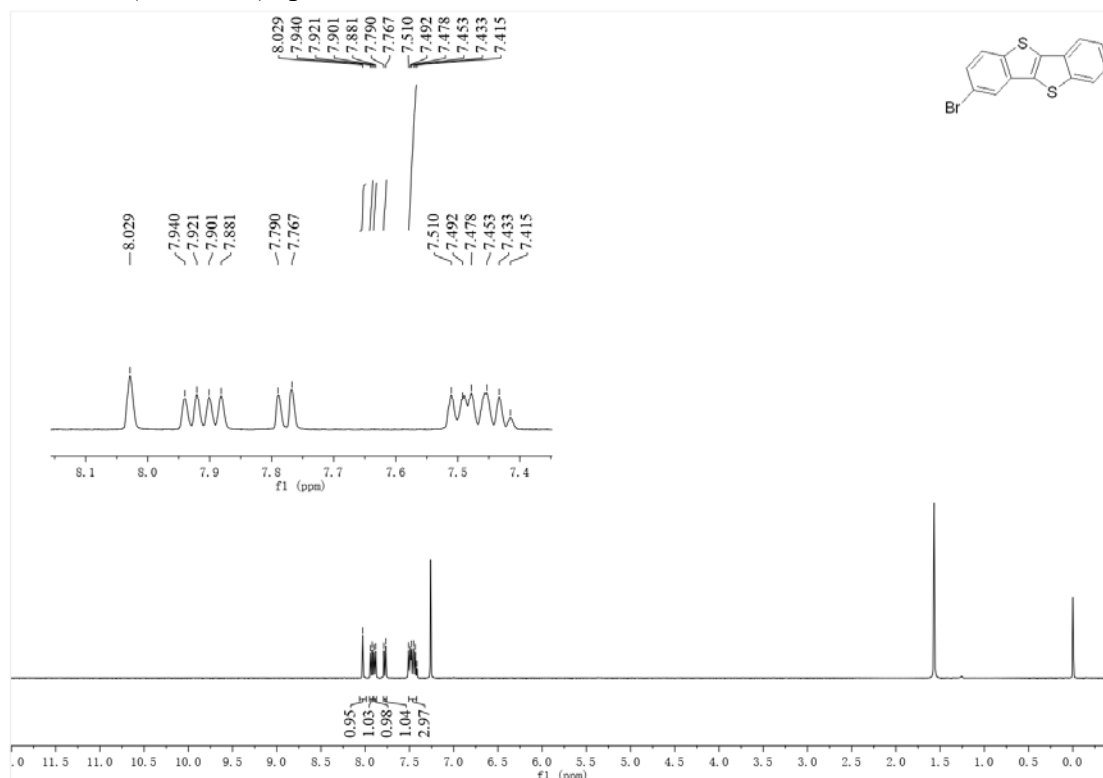

$^{13}\text{C}$  NMR (100 MHz) spectrum of **4a** in  $\text{CDCl}_3$

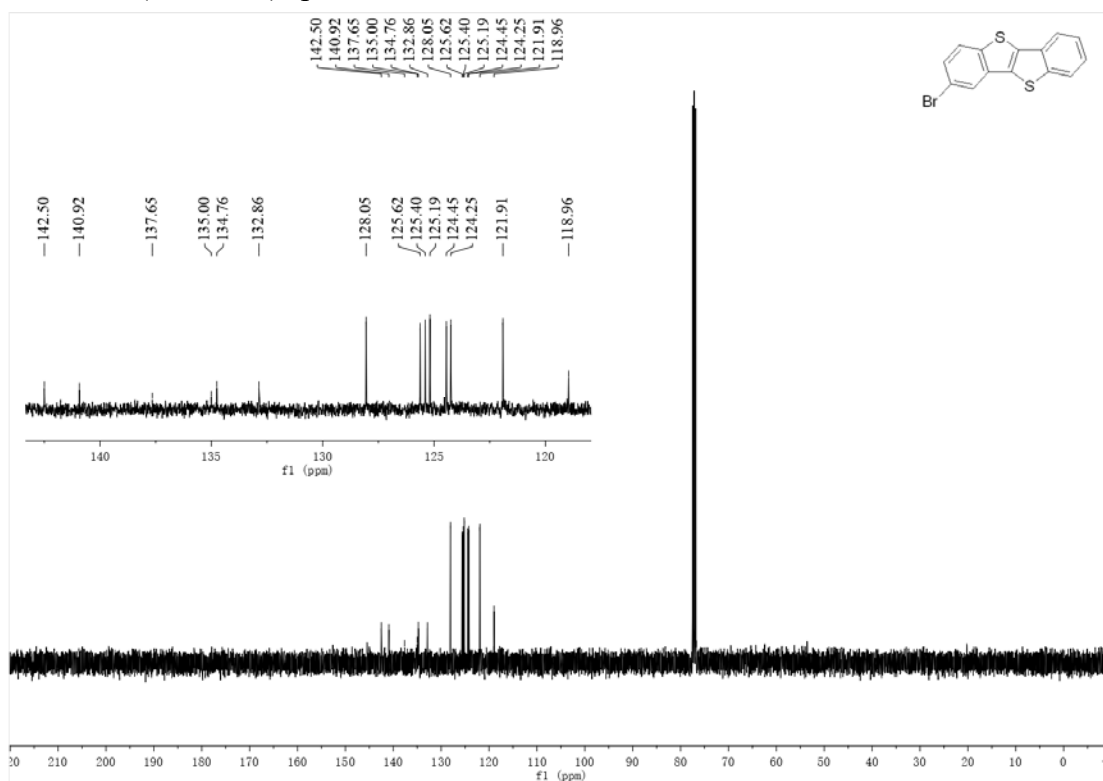

<sup>1</sup>H NMR (400 MHz) spectrum of **4b** in CDCl<sub>3</sub>

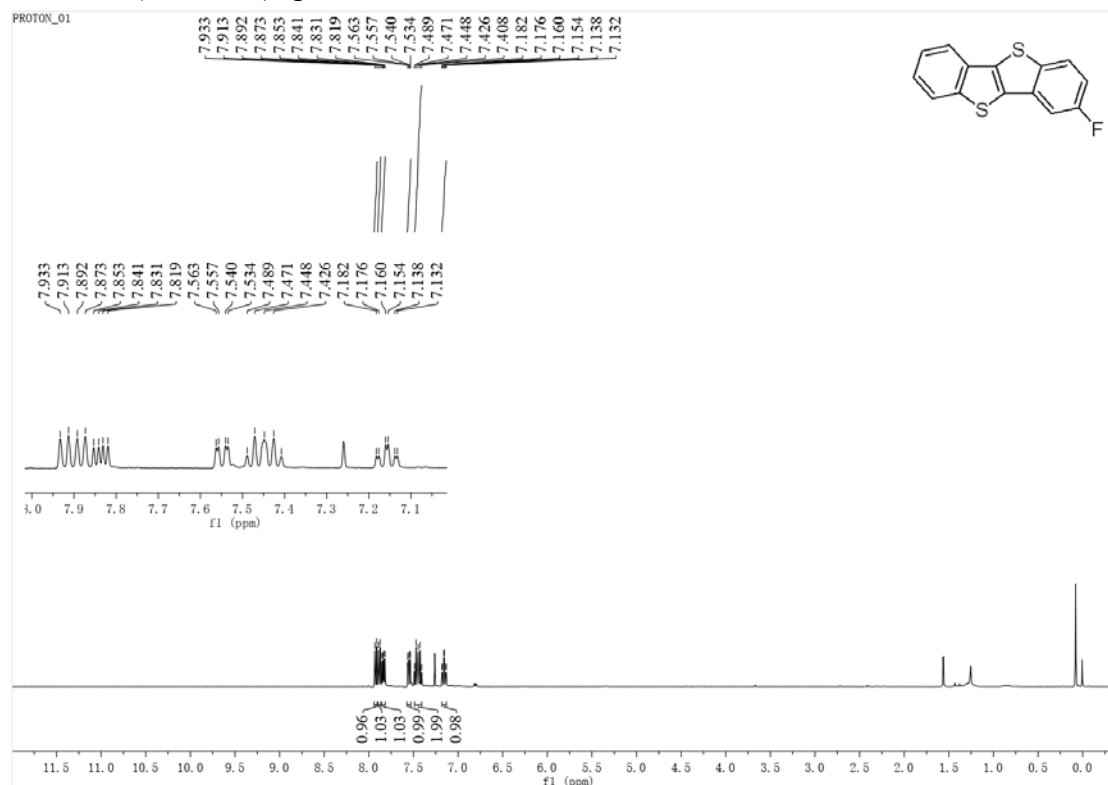

<sup>13</sup>C NMR (100 MHz) spectrum of **4b** in CDCl<sub>3</sub>

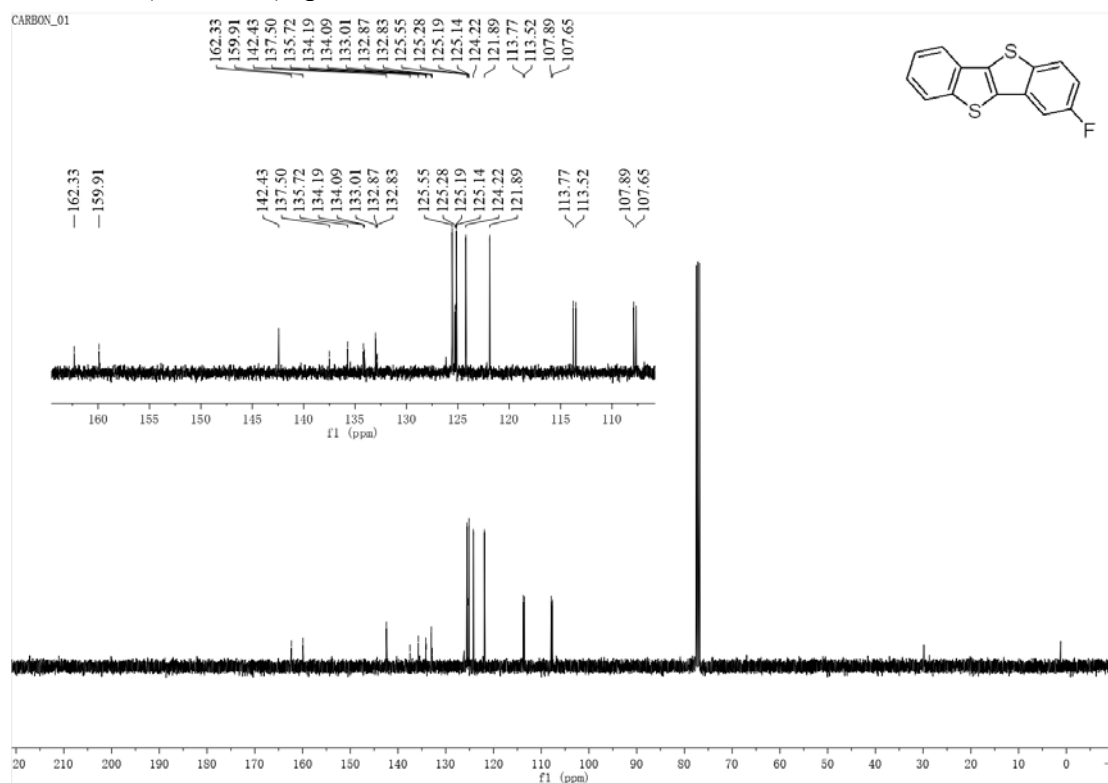



$^1\text{H}$  NMR (400 MHz) spectrum of **4c** in  $\text{CDCl}_3$

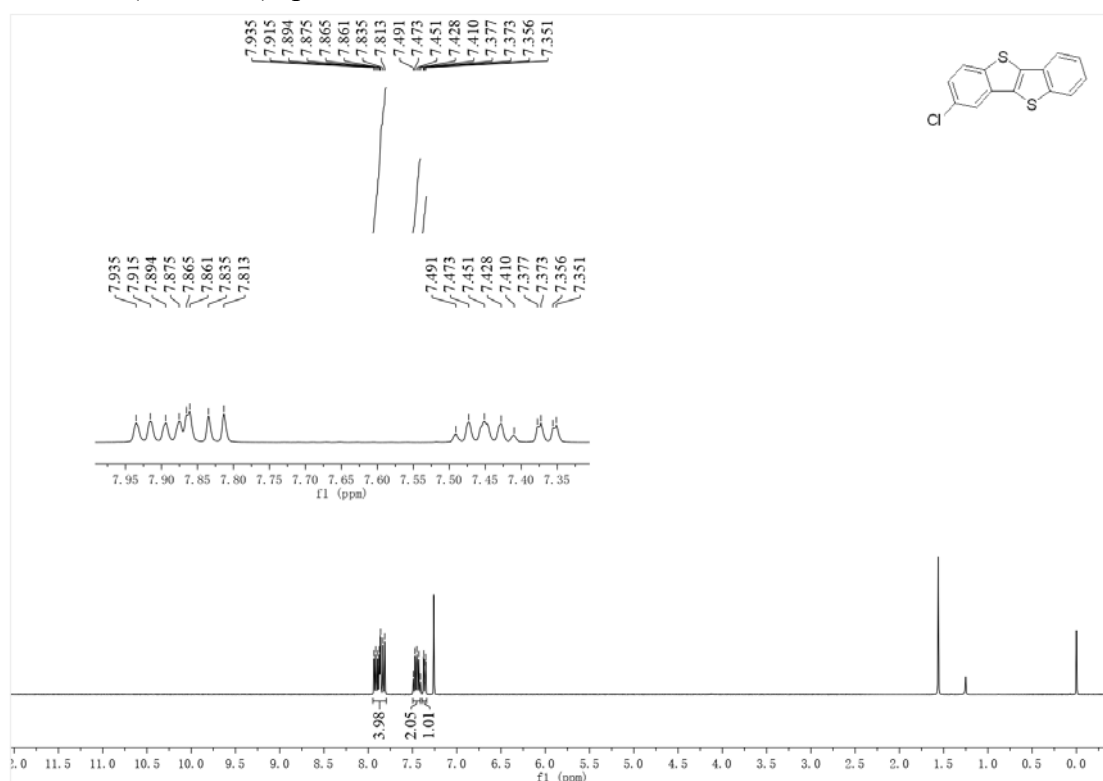

$^{13}\text{C}$  NMR (100 MHz) spectrum of **4c** in  $\text{CDCl}_3$

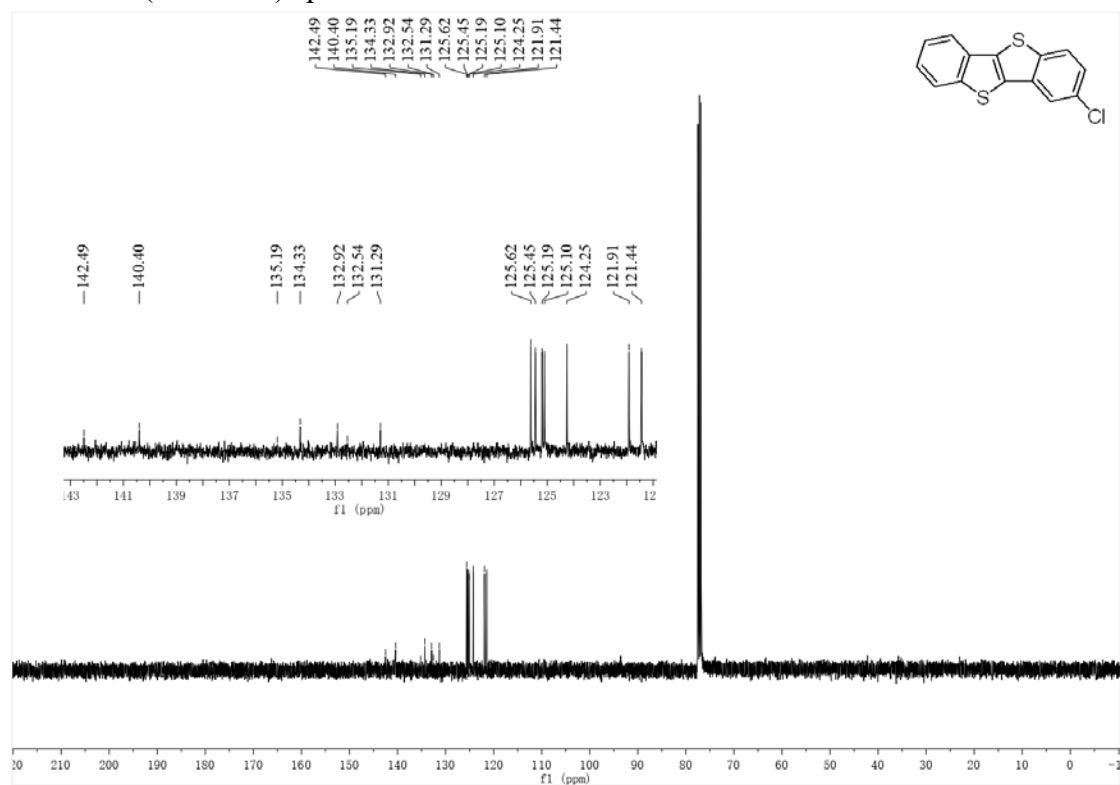

<sup>1</sup>H NMR (400 MHz) spectrum of **4d** in CDCl<sub>3</sub>

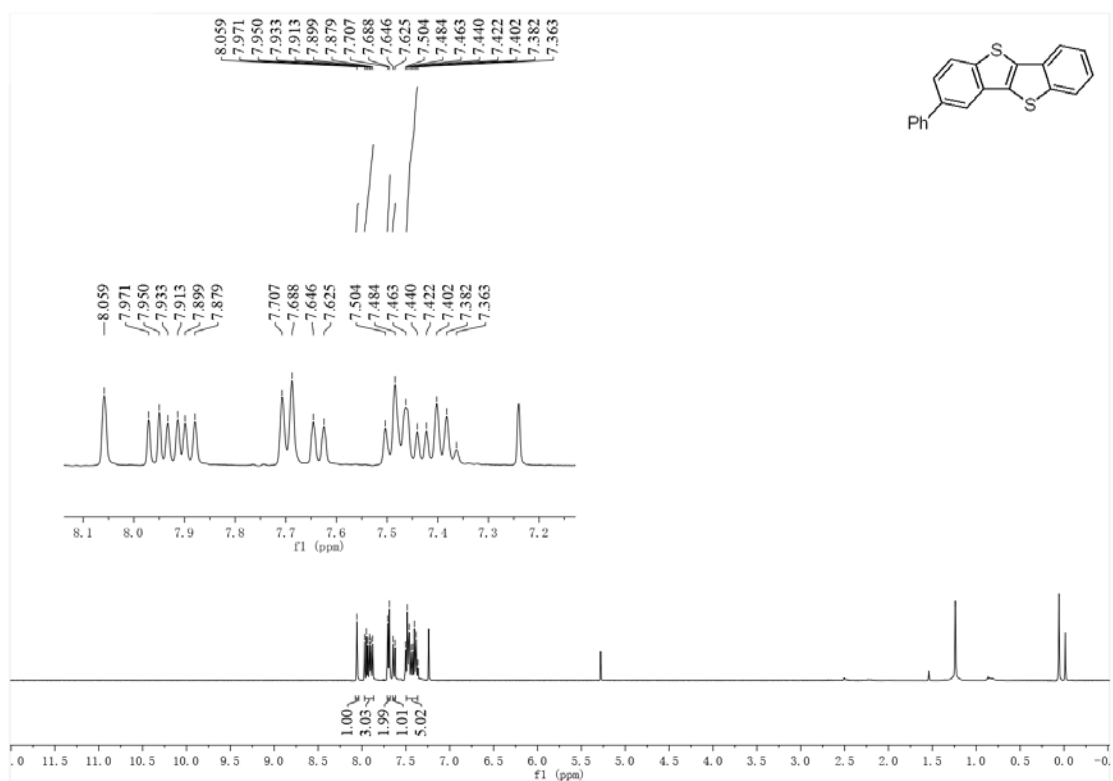

<sup>13</sup>C NMR (100 MHz) spectrum of **4d** in CDCl<sub>3</sub>

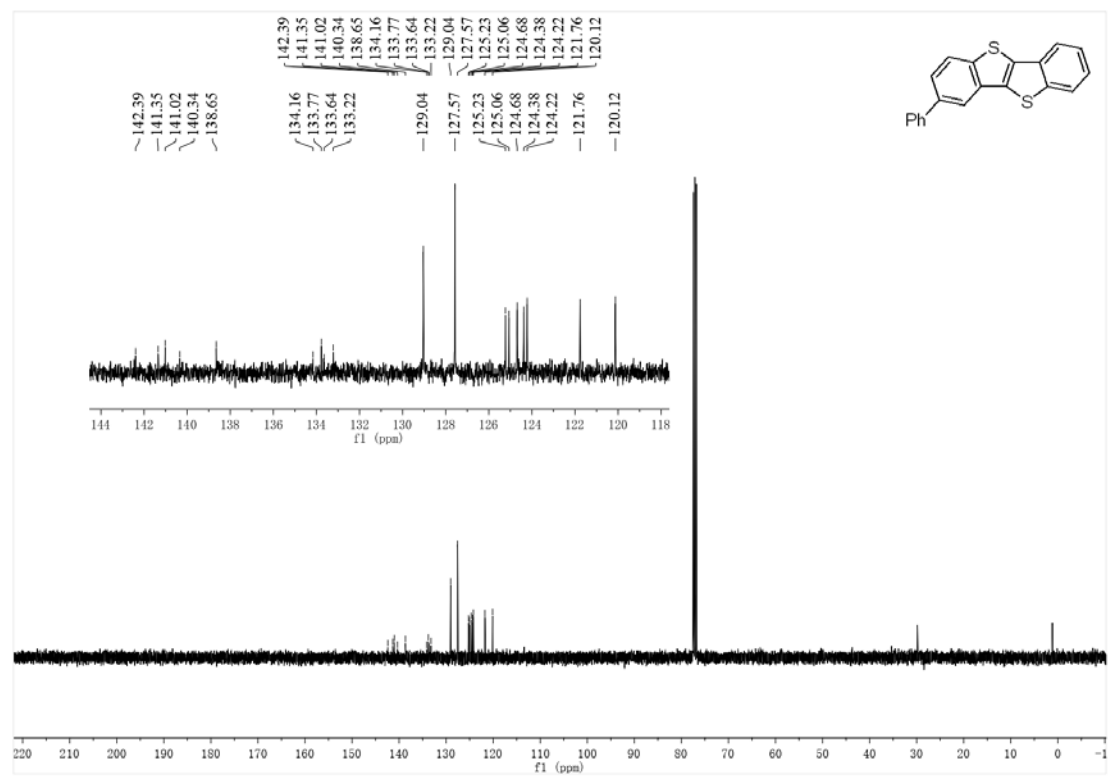

<sup>1</sup>H NMR (400 MHz) spectrum of **5a** in CDCl<sub>3</sub>

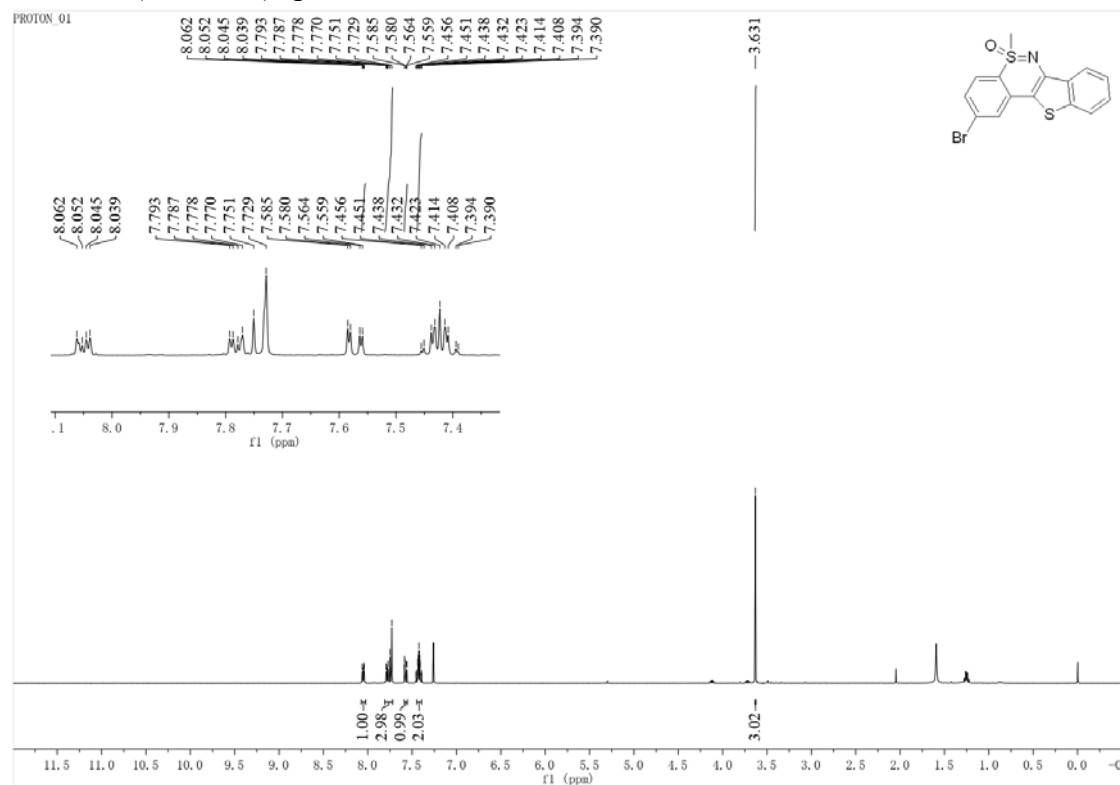

<sup>13</sup>C NMR (100 MHz) spectrum of **5a** in CDCl<sub>3</sub>

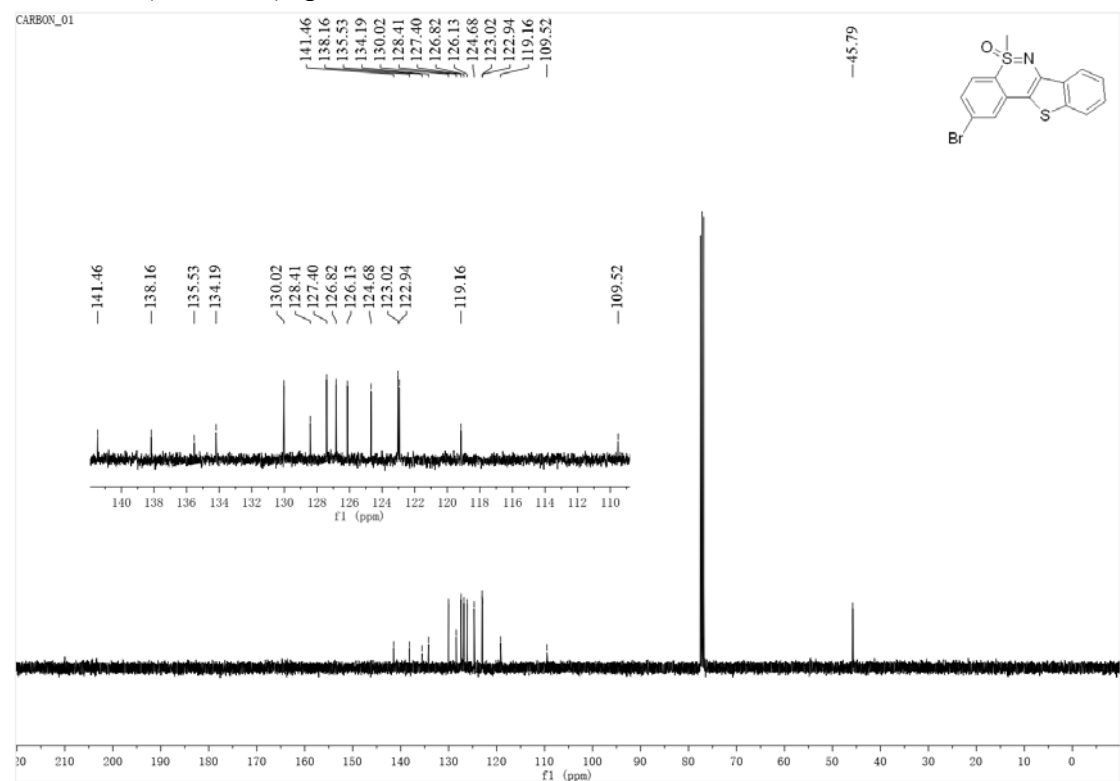

$^1\text{H}$  NMR (400 MHz) spectrum of **7a** in  $\text{CDCl}_3$

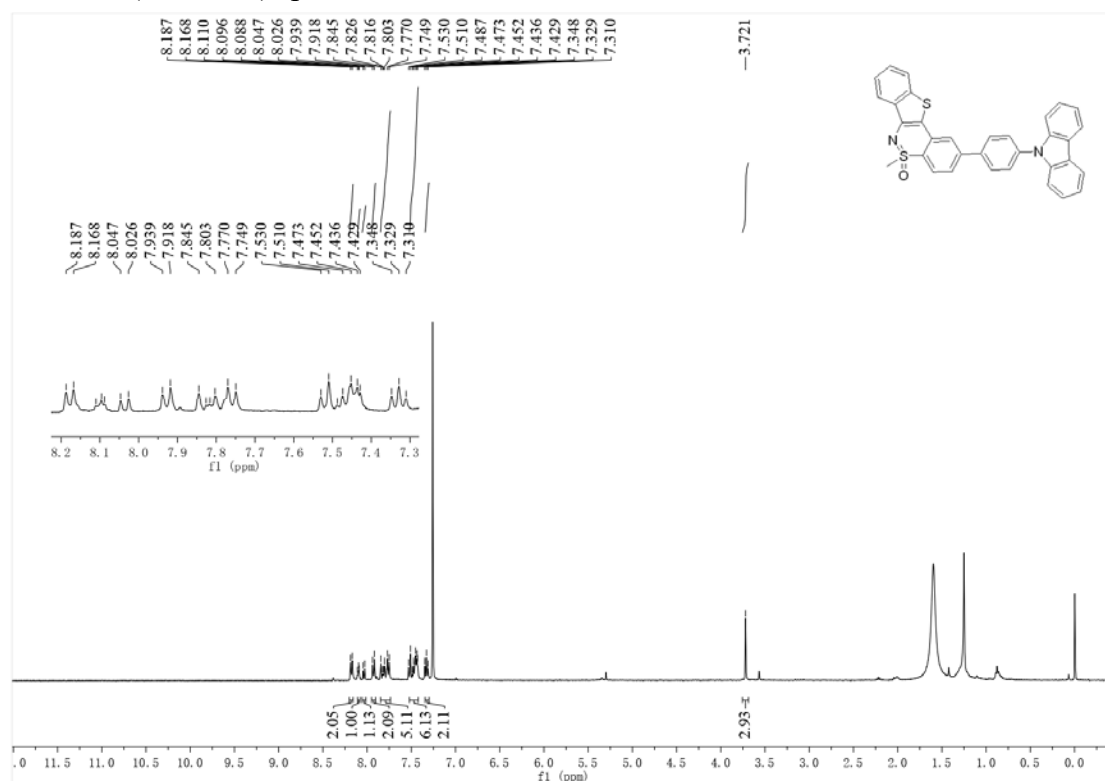

$^{13}\text{C}$  NMR (100 MHz) spectrum of **7a** in  $\text{CDCl}_3$

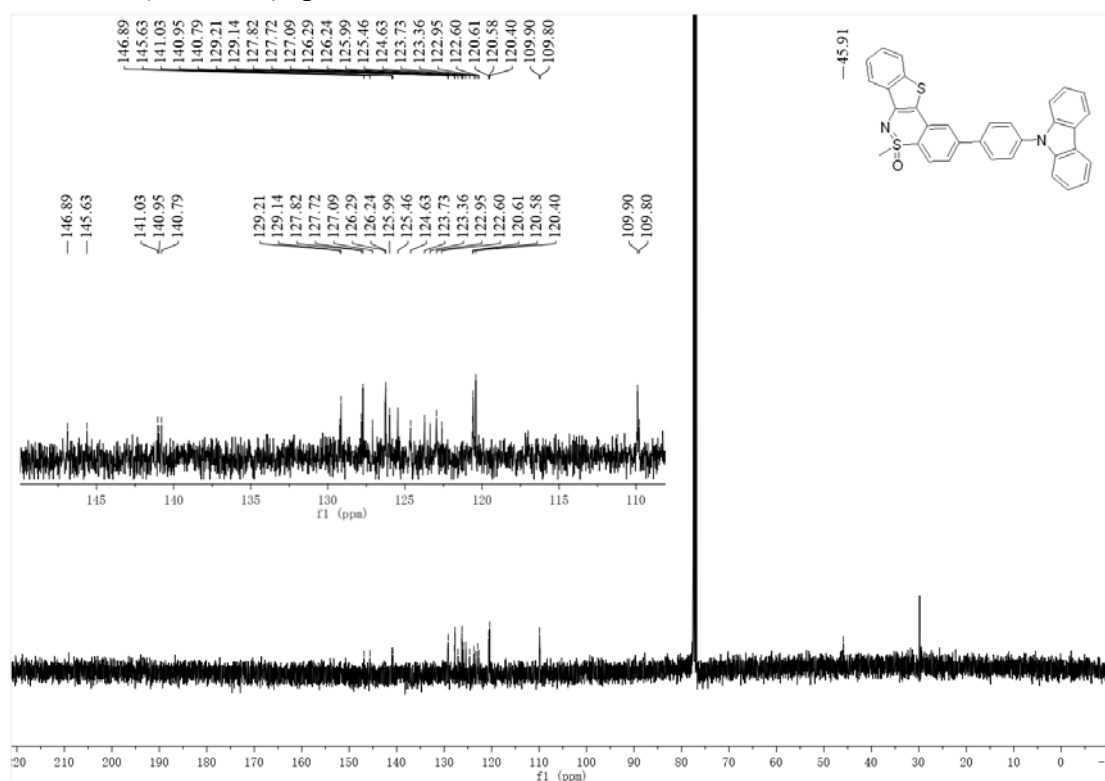

<sup>1</sup>H NMR (400 MHz) spectrum of **7b** in CDCl<sub>3</sub>

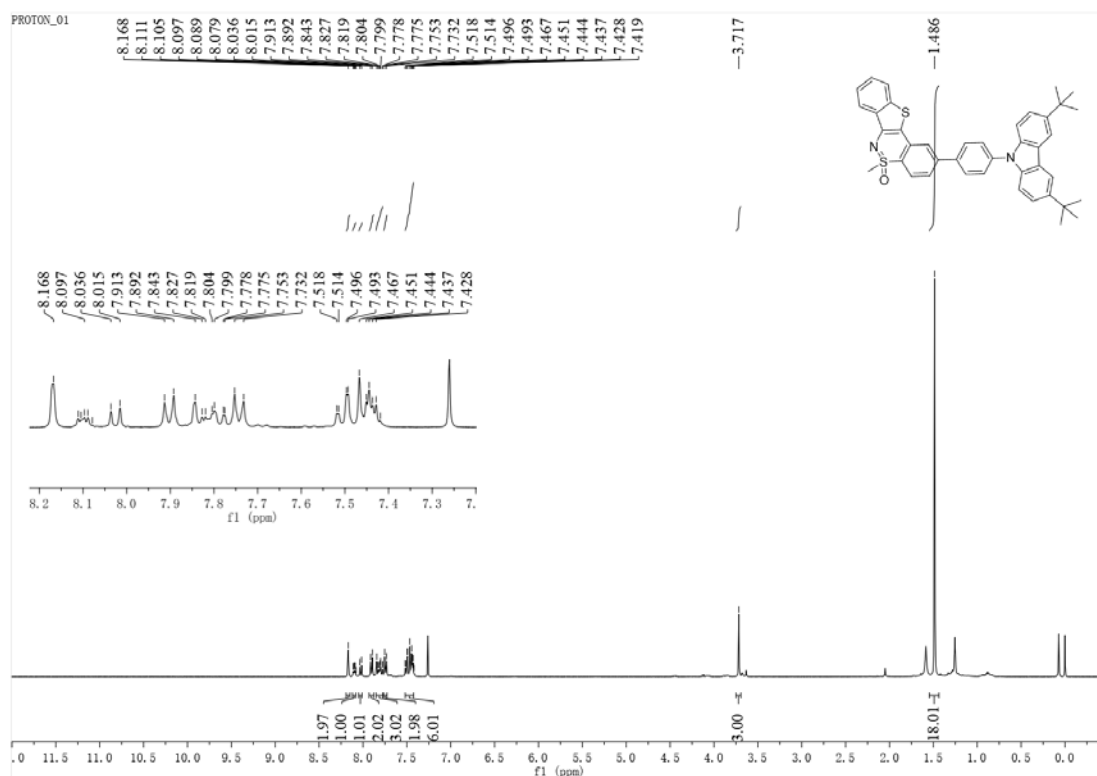

<sup>13</sup>C NMR (100 MHz) spectrum of **7b** in CDCl<sub>3</sub>

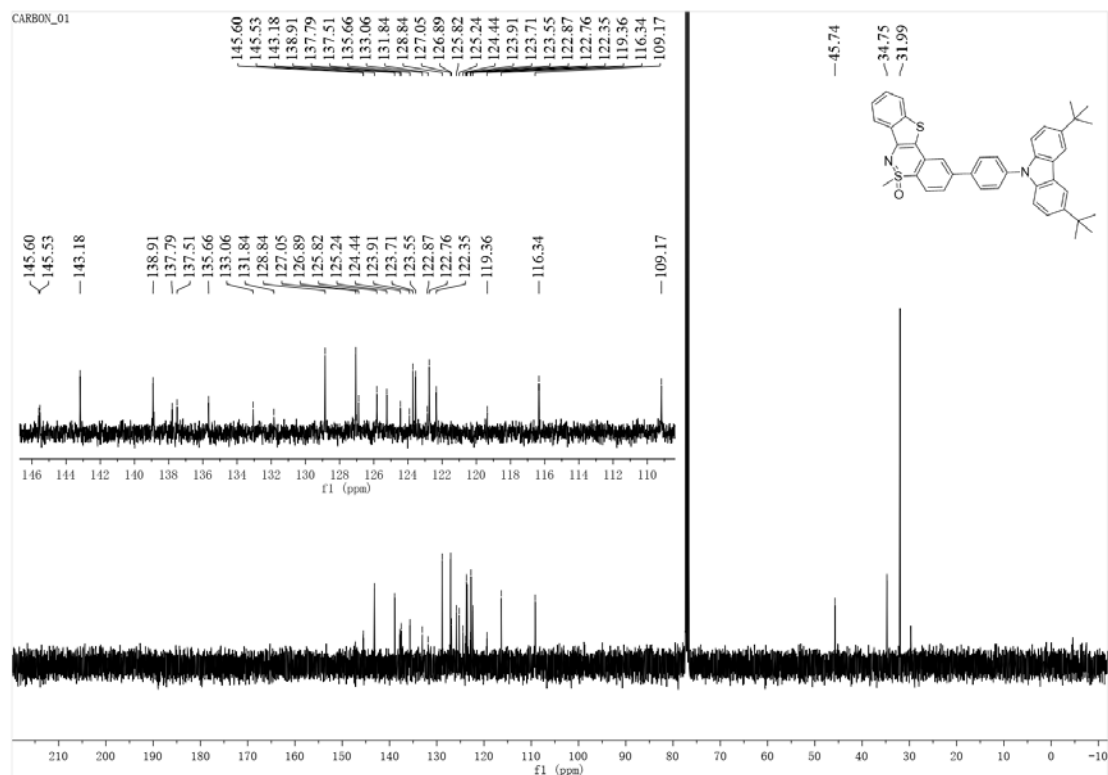

Supplement: d2cc02232j1.pdf [file d2cc02232j1.pdf]
